# Supplementary material
Source: publisher figshare collection journal article supplement (https://acs.figshare.com/ndownloader/files/4465693)
Supplement: Supplementary file 1 [file 4465693]

# Enantioselective $\alpha$ -Amination of 1,3-Dicarbonyl Compounds Using Squaramide Derivatives as Hydrogen Bonding Catalysts

Hideyuki Konishi, Tin Yiu Lam, Jeremiah P. Malerich, and Viresh H. Rawal\*

Department of Chemistry, University of Chicago, 5735 South Ellis Avenue, Chicago, IL 60637

Email: vrawal@uchicago.edu

## Supporting Information Table of Contents

|     |                                                                                                                                |
|-----|--------------------------------------------------------------------------------------------------------------------------------|
| S2  | General methods and materials                                                                                                  |
| S2  | Preparation of squaramide catalysts                                                                                            |
| S4  | General experimental procedure of $\alpha$ -hydrazination reactions                                                            |
| S4  | Analytical data of $\alpha$ -hydrazination products                                                                            |
| S10 | Synthesis of azodicarboxylate <b>7</b>                                                                                         |
| S11 | Determination of the absolute stereochemistry of hydrazination products <b>6b</b> and <b>6e</b><br>(a) Discussion              |
| S15 | Determination of the absolute stereochemistry of hydrazination products <b>6b</b> and <b>6e</b><br>(b) Experimental procedures |
| S16 | X-ray crystal structure of <b>22</b>                                                                                           |
| S17 | References                                                                                                                     |
| S19 | NMR spectra                                                                                                                    |
| S39 | HPLC traces                                                                                                                    |
| S57 | X-ray crystal structure data for <b>22</b>                                                                                     |

**General.** All reactions were performed in oven dried or flame dried glassware under N<sub>2</sub> atmosphere. Reactions were monitored by TLC on Whatman silica gel 60 Å F254 plates visualized by anisaldehyde and ceric ammonium molybdate staining solutions. Flash column chromatography was performed on Dynamic Adsorbents 32-63 µm Flash silica gel. NMR spectra were measured on Bruker DRX and DMX spectrometers at 500 MHz for <sup>1</sup>H spectra and 125 MHz for <sup>13</sup>C spectra and calibrated from residual solvent signal (chloroform at 7.26 ppm and DMSO at 2.50 ppm for <sup>1</sup>H spectra; chloroform at 77.0 ppm and DMSO at 39.51 ppm for <sup>13</sup>C spectra). Infrared spectra were measured on a Nicolet 6700 FT-IR spectrometer on NaCl plates. Mass spectral analysis was performed by the CUNY Mass Spectrometry Facility at Hunter College (New York, NY) directed by Dr. Clifford Soll. Enantiomeric excesses (ee) were determined by HPLC analysis using an Agilent 1100 Series instrument with Daicel Chiralpak IA or Chiralpak OD-H columns, as indicated. Melting point was measured using a Laboratory Devices MEL-TEMP Apparatus or a Thomas Hoover Uni-Melt Capillary Melting Point Apparatus. Optical rotation was measured on a Jasco DIP-1000 Digital Polarimeter at the indicated concentration with units g/100 mL.

**Materials.** All commercially available reagents were used as received unless otherwise stated. Methylene chloride (CH<sub>2</sub>Cl<sub>2</sub>), tetrahydrofuran (THF), and toluene were purified by passage over activated alumina. MeOH (99.8%, extra dry) was purchased from Acros Organics. 3,4-Dimethoxy-3-cyclobutene-1,2-dione (dimethyl squarate) is a generous gift from Professor Leo A. Paquette (Ohio State University). β-Ketoesters **1a**, **1b**, **1c**, **1g**, and 1,3-diketone **1h** were purchased from Aldrich and distilled prior to use. 1,3-Dicarbonyl compounds **1d**,<sup>1</sup> **1e**,<sup>2</sup> **1f**,<sup>3</sup> **1i**,<sup>4</sup> **1j-1k**,<sup>5</sup> **1l**,<sup>6</sup> **1m**,<sup>7</sup> **1n**,<sup>8</sup> and **1o**<sup>9</sup> were synthesized according to precedent literature. Azodicarboxylates **2** and **5** were purchased from Aldrich. Pyridine was AcroSeal™ anhydrous grade. *N*-Bromosuccinimide was recrystallized from H<sub>2</sub>O. Et<sub>3</sub>N was distilled from CaH<sub>2</sub>.

**Preparation of squaramide catalysts.** Squaramide catalysts **3a-3l** were synthesized according to previous reports<sup>10,11</sup> or by a representative experimental procedure shown below.

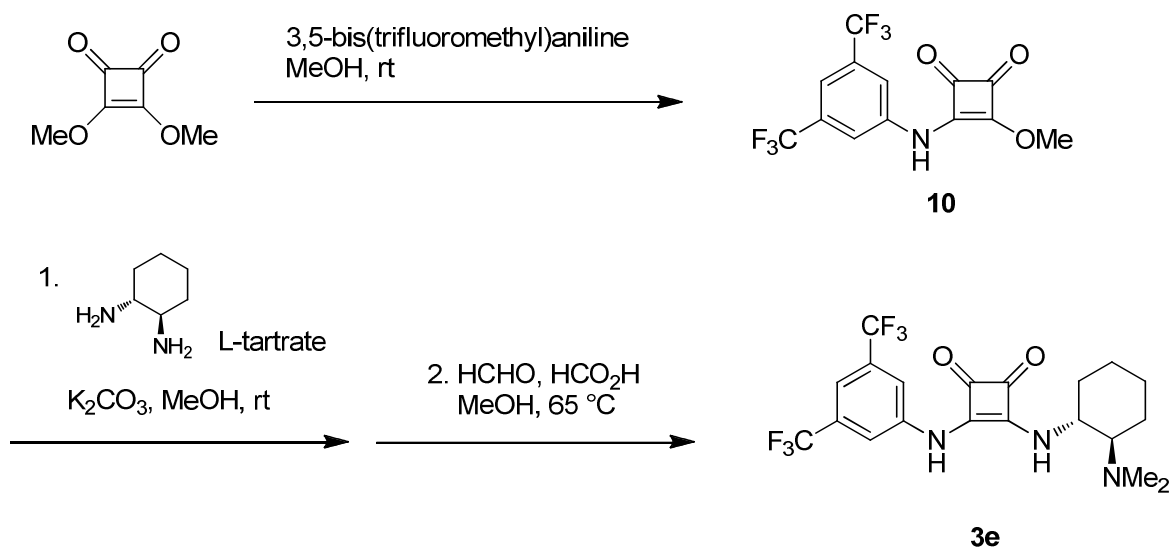

**Squaramide 3e.** To a solution of 3,4-dimethoxy-3-cyclobutene-1,2-dione (2.00 g, 14.1 mmol) in MeOH (20 mL) was added 3,5-bis(trifluoromethyl)aniline (2.40 mL, 15.5 mmol, 1.1 equiv). The mixture was

stirred at rt for 2d (yellow precipitate was generated). The reaction mixture was filtered with the aid of MeOH. Obtained yellow solid was dried *in vacuo* to give **10** (4.59 g, 13.5 mmol, 96%).

To a suspension of (*R,R*)-1,2-diaminocyclohexanes L-tartrate (857 mg, 3.24 mmol, 1.1 equiv) in MeOH (10 mL) was added K<sub>2</sub>CO<sub>3</sub> (896 mg, 6.49 mmol, 2.2 equiv). The reaction mixture was stirred at rt for 1h and then **10** (1.00 g, 2.95 mmol) was added. The resulting mixture was stirred at rt for 2h, diluted with CHCl<sub>3</sub> (100 mL) and then filtered through a pad of Celite with the aid of CHCl<sub>3</sub>. The filtrate and washings were combined and concentrated *in vacuo* to give the crude amine.

To a solution of the crude amine in MeOH (10 mL) was added 37% aqueous HCHO (5 mL, 67 mmol, 23 equiv) and HCO<sub>2</sub>H (5 mL, 133 mmol, 45 equiv) at rt. The reaction mixture was stirred under reflux for 12 h, then basified by 6 M aq NaOH to pH12 and extracted with CH<sub>2</sub>Cl<sub>2</sub>. The combined organic layers were dried over MgSO<sub>4</sub> and then concentrated. Obtained residue was purified by recrystallization from *i*-PrOH and H<sub>2</sub>O to give squaramide catalyst **3e** (663 mg, 1.48 mmol, 50%) as a white solid: Mp 196-198 °C (Decomp.); <sup>1</sup>H NMR (500 MHz, DMSO-*d*<sub>6</sub>) δ 10.36 (br s, 1H), 8.07 (s, 2H), 7.85 (br s, 1H), 7.65 (s, 1H), 3.78-3.93 (m, 1H), 2.36-2.46 (m, 1H), 2.19 (s, 6H), 2.04-2.14 (m, 1H), 1.80-1.90 (m, 1H), 1.71-1.79 (m, 1H), 1.63-1.70 (m, 1H), and 1.13-1.41 (m, 4H); <sup>13</sup>C NMR (125 MHz, DMSO-*d*<sub>6</sub>) δ 184.4, 179.9, 169.4, 162.2, 141.2, 131.7, 131.4, 131.1, 130.9, 126.4, 124.2, 122.0, 119.9, 117.9, 114.5, 66.1, 54.7, 39.9, 34.4, 24.3, and 21.2; IR (film) 3207, 3149, 2944, 2866, 2788, 1790, 1671, 1654, 1579, 1531, 1488, 1473, 1454, 1379, 1276, 1174, and 1121 cm<sup>-1</sup>; HRMS (ESI) [M+H]<sup>+</sup> calcd for C<sub>20</sub>H<sub>21</sub>F<sub>6</sub>N<sub>3</sub>O<sub>2</sub>: 450.1611; found 450.1605; [α]<sup>28</sup><sub>D</sub> -50.76 (*c* 1.00, DMSO).

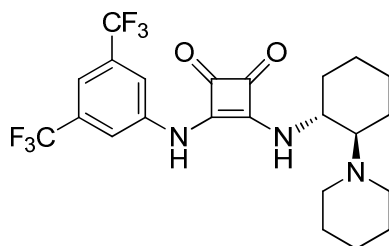

**Squaramide 3j:** Prepared according to published procedure<sup>11</sup> in 65% yield. Yellow solid. Mp 136-138 °C (Decomp.); <sup>1</sup>H NMR (500 MHz, DMSO-*d*<sub>6</sub>) δ 10.22 (br s, 1H), 8.06 (s, 2H), 7.65 (s, 1H), 7.61 (br s, 1H), 3.82-4.00 (m, 1H), 2.55-2.68 (m, 2H), 2.18-2.37 (m, 3H), 1.98-2.12 (m, 1H), 1.79-1.91 (m, 1H), 1.63-1.79 (m, 2H), and 1.17-1.43 (m, 10H); <sup>13</sup>C NMR (125 MHz, DMSO-*d*<sub>6</sub>) δ 184.6, 180.0, 170.1, 161.6, 141.2, 131.7, 131.4, 131.2, 130.9, 126.4, 124.2, 122.1, 119.9, 117.8, 114.5, 68.2, 54.4, 49.4, 33.8, 26.3, 24.7, 24.4, 24.3, and 23.3; IR (film) 3245, 3084, 2934, 2859, 2805, 1794, 1673, 1593, 1558, 1473, 1452, 1379, 1278, 1181, and 1134 cm<sup>-1</sup>; HRMS (ESI) [M+H]<sup>+</sup> calcd for C<sub>23</sub>H<sub>25</sub>F<sub>6</sub>N<sub>3</sub>O<sub>2</sub>: 490.1924; found 490.1930; [α]<sup>28</sup><sub>D</sub> -18.62 (*c* 0.43, DMSO).

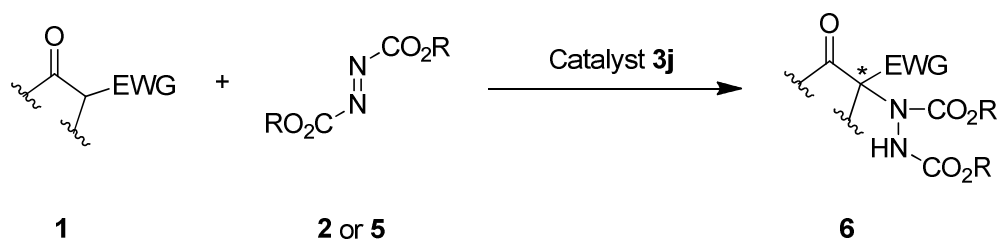

**Typical experimental procedure for  $\alpha$ -hydrazination reaction of 1,3-dicarbonyl compound using squaramide catalyst at room temperature.** To a solution of squaramide catalyst **3** (0.1–2 mol%) in toluene (0.500 mL) was added azodicarboxylate **2** or **5** (0.500 mmol, 1.0 equiv) and 1,3-dicarbonyl compound **1** (0.750 mmol, 1.5 equiv or 0.550 mmol, 1.1 equiv). The mixture was stirred at rt until TLC analysis showed that **2** or **5** was completely consumed. The reaction mixture was directly purified by silica gel chromatography to afford the desired product **4** or **6**. Enantiomeric excess was determined by HPLC analysis using IA or OD-H column.

**Representative experimental procedure for  $\alpha$ -hydrazination reaction of 1,3-dicarbonyl compound using squaramide catalyst at low temperature (Table 2, entry 14).** To a solution of squaramide catalyst **3j** (2.45 mg, 0.005 mmol, 1 mol%) in toluene (0.200 mL) was added azodicarboxylate **5** (127 mg, 0.500 mmol, 1.0 equiv) and the reaction mixture was cooled to the indicated temperature. A solution of  $\beta$ -ketoester **11** (115 mg, 0.550 mmol, 1.1 equiv) in toluene (0.200 mL) was slowly added to the reaction mixture, followed by a rinse with toluene (0.100 mL). The mixture was stirred at the indicated temperature until TLC analysis showed that **5** was completely consumed. The reaction mixture was directly purified by column chromatography on silica gel (hexanes/EtOAc 15/1 to 4/1) to afford the desired product **6l** (217 mg, 0.501 mmol, quant. yield). Enantiomeric excess was determined by HPLC analysis using IA column and found to be 90% ee.

**Note on spectroscopic data.** Due to restricted rotation around the carbamate C–N bonds, the hydrazination products exist as mixtures of rotamers at room temperature. As a result, complex  $^1\text{H}$  and  $^{13}\text{C}$  spectra with broad and/or multiple signals are obtained. Therefore, instead of listing the chemical shifts in the characterization data, the actual spectra reproduced below are indicated.

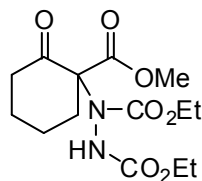

**Diethyl 1-(1-(methoxycarbonyl)-2-oxocyclohexyl)hydrazine-1,2-dicarboxylate (**4**):** Purification by column chromatography on silica gel (hexanes/EtOAc 15/1 to 8/1); colorless oil;  $^1\text{H}$  NMR (500 MHz,  $\text{CDCl}_3$ ) see below;  $^{13}\text{C}$  NMR (125 MHz,  $\text{CDCl}_3$ ) see below; IR (neat) 3296, 2952, 1728, 1444, 1375, 1326, 1278, 1219, 1120, 1093, 1061, 762, 567  $\text{cm}^{-1}$ ; HRMS (ESI)  $[\text{M} + \text{Na}]^+$  calcd for  $\text{C}_{14}\text{H}_{23}\text{N}_2\text{O}_7$ : 331.1500; found 331.1304;  $[\alpha]_D^{25} +12.92$  ( $c$  1.00,  $\text{CHCl}_3$ , 92% ee); HPLC (CHIRALPAC IA, 0.46  $\text{cm} \varnothing \times 25$   $\text{cmL}$ , hexanes/2-propanol = 95/5, flow rate 1.0 mL/min, UV detection at 220 nm)  $t_R$  = 22.4 min (minor),  $t_R$  = 25.9 min (major), 95% ee.

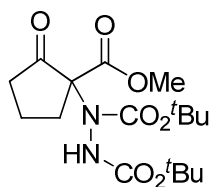

**Di-tert-butyl 1-(1-(methoxycarbonyl)-2-oxocyclopentyl)hydrazine-1,2-dicarboxylate (6b):** Purification by column chromatography on silica gel (hexaness to hexaness/EtOAc 4/1); colorless oil;  $^1\text{H}$  NMR (500 MHz,  $\text{CDCl}_3$ ) see below;  $^{13}\text{C}$  NMR (125 MHz,  $\text{CDCl}_3$ ) see below; IR (neat) 3328, 2978, 1734, 1456, 1367, 1244, 1154, 998, 756  $\text{cm}^{-1}$ ; HRMS (ESI)  $[\text{M} + \text{Na}]^+$  calcd for  $\text{C}_{17}\text{H}_{28}\text{N}_2\text{O}_7$ : 395.1789; found 395.1790;  $[\alpha]^{29}_{\text{D}} +5.74$  ( $c$  1.44,  $\text{CHCl}_3$ , 96% ee); HPLC (CHIRALPAC IA, 0.46  $\text{cm} \varnothing \times 25$   $\text{cmL}$ , hexanes/ethanol = 95/5, flow rate 1.0  $\text{mL/min}$ , UV detection at 210 nm)  $t_R = 7.1$  min (minor),  $t_R = 7.9$  min (major).

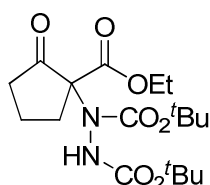

**Di-tert-butyl 1-(1-(ethoxycarbonyl)-2-oxocyclopentyl)hydrazine-1,2-dicarboxylate (6c)<sup>12</sup>:** Purification by column chromatography on silica gel (hexaness to hexaness/EtOAc 9/1); colorless oil. Analytical data matched previously reported values.<sup>12</sup>  $[\alpha]^{30}_{\text{D}} +3.52$  ( $c$  1.20,  $\text{CHCl}_3$ , 96% ee); Lit.<sup>12</sup>  $[\alpha]^{32}_{\text{D}} -3.47$  ( $c$  1.09,  $\text{CHCl}_3$ , 97% ee); HPLC (CHIRALPAC IA, 0.46  $\text{cm} \varnothing \times 25$   $\text{cmL}$ , hexanes/ethanol = 95/5, flow rate 1.0  $\text{mL/min}$ , UV detection at 210 nm)  $t_R = 6.0$  min (minor),  $t_R = 6.5$  min (major).

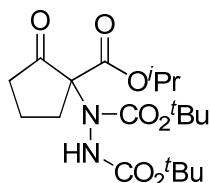

**Di-tert-butyl 1-(1-(isopropoxycarbonyl)-2-oxocyclopentyl)hydrazine-1,2-dicarboxylate (6d):** Purification by column chromatography on silica gel (hexaness to hexaness/EtOAc 9/1); colorless oil that solidified to white solid on standing at 4  $^{\circ}\text{C}$ ; Mp 68-70  $^{\circ}\text{C}$ ;  $^1\text{H}$  NMR (500 MHz,  $\text{CDCl}_3$ ) see below;  $^{13}\text{C}$  NMR (125 MHz,  $\text{CDCl}_3$ ) see below; IR (neat) 3331, 2979, 1725, 1457, 1367, 1241, 1155, 1104, 1033, 979, 918, 852, 758, 534  $\text{cm}^{-1}$ ; HRMS (ESI)  $[\text{M} + \text{Na}]^+$  calcd for  $\text{C}_{19}\text{H}_{32}\text{N}_2\text{O}_7$ : 423.2102; found 423.2104;  $[\alpha]^{28}_{\text{D}} +1.63^{\circ}$  ( $c$  1.10,  $\text{CHCl}_3$ , 96% ee); HPLC (CHIRALPAC IA, 0.46  $\text{cm} \varnothing \times 25$   $\text{cmL}$ , hexanes/2-propanol = 95/5, flow rate 1.0  $\text{mL/min}$ , UV detection at 210 nm)  $t_R = 7.9$  min (minor),  $t_R = 11.1$  min (major).

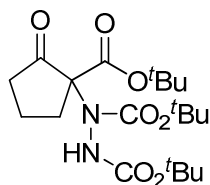

**Di-*tert*-butyl 1-(1-(*tert*-butoxycarbonyl)-2-oxocyclopentyl)hydrazine-1,2-dicarboxylate (6e)**<sup>13</sup> : Purification by column chromatography on silica gel (hexaness to hexaness/EtOAc 9/1); colorless oil. Analytical data matched previously reported values.<sup>13</sup>  $[\alpha]_D^{29} +2.40$  (*c* 0.91, CHCl<sub>3</sub>, 94% ee); Lit.<sup>13</sup>  $[\alpha]_D^{rt} -2.7$  (*c* 1.0, CHCl<sub>3</sub>, 89% ee); HPLC (CHIRALPAC IA, 0.46 cm $\phi$   $\times$  25 cmL, hexanes/2-propanol = 98/2, flow rate 1.0 mL/min, UV detection at 210 nm)  $t_R$  = 14.9 min (minor),  $t_R$  = 19.4 min (major).

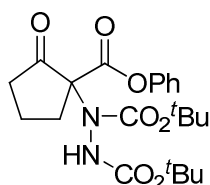

**Di-*tert*-butyl 1-(1-(phenoxycarbonyl)-2-oxocyclopentyl)hydrazine-1,2-dicarboxylate (6f)**: Purification by column chromatography on silica gel (hexaness to hexaness/EtOAc 4/1); white flakes; Mp 35 - 37 °C; <sup>1</sup>H NMR (500 MHz, CDCl<sub>3</sub>) see below; <sup>13</sup>C NMR (125 MHz, CDCl<sub>3</sub>) see below; IR (neat) 3342, 2978, 2933, 1747, 1711, 1592, 1492, 1457, 1368, 1245, and 1160 cm<sup>-1</sup>; HRMS (ESI) [M + Na]<sup>+</sup> calcd for C<sub>22</sub>H<sub>30</sub>N<sub>2</sub>O<sub>7</sub>: 457.1945; found 457.1954;  $[\alpha]_D^{27} +1.83$  (*c* 1.00, CHCl<sub>3</sub>, 95% ee); HPLC (CHIRALPAC IA, 0.46 cm $\phi$   $\times$  25 cmL, hexanes/2-propanol = 97/3, flow rate 1.0 mL/min, UV detection at 210 nm)  $t_R$  = 18.2 min (minor),  $t_R$  = 27.1 min (major).

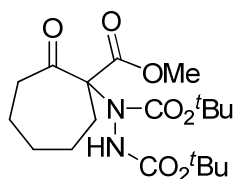

**Di-*tert*-butyl 1-(1-(methoxycarbonyl)-2-oxocycloheptyl)hydrazine-1,2-dicarboxylate (6g)**: Purification by column chromatography on silica gel (hexaness to hexaness/EtOAc 9/1); white flakes; Mp 45 - 46 °C; <sup>1</sup>H NMR (500 MHz, CDCl<sub>3</sub>) see below; <sup>13</sup>C NMR (125 MHz, CDCl<sub>3</sub>) see below; IR (neat) 3306, 2978, 2934, 1723, 1477, 1456, 1368, 1238, and 1152 cm<sup>-1</sup>; HRMS (ESI) [M + Na]<sup>+</sup> calcd for C<sub>19</sub>H<sub>32</sub>N<sub>2</sub>O<sub>7</sub>: 423.2102; found 423.2106;  $[\alpha]_D^{30} +11.67$  (*c* 1.02, CHCl<sub>3</sub>, 94% ee); HPLC (CHIRALPAC OD-H, 0.46 cm $\phi$   $\times$  25 cmL, hexanes/2-propanol = 97/3, flow rate 1.0 mL/min, UV detection at 210 nm)  $t_R$  = 5.9 min (major),  $t_R$  = 7.9 min (minor).

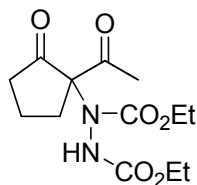

**Diethyl 1-(1-(acetyl-2-oxocyclopentyl)hydrazine-1,2-dicarboxylate (6h)**: Purification by column chromatography on silica gel (hexaness/EtOAc 4/1 to 2/1); colorless oil; <sup>1</sup>H NMR (500 MHz, CDCl<sub>3</sub>) see below; <sup>13</sup>C NMR (125 MHz, CDCl<sub>3</sub>) see below; IR (neat) 3298, 2982, 1750, 1717, 1510, 1404, 1377, 1335, and 1235 cm<sup>-1</sup>; HRMS (ESI) [M + Na]<sup>+</sup> calcd for C<sub>13</sub>H<sub>20</sub>N<sub>2</sub>O<sub>6</sub>: 323.1214; found 323.1214;  $[\alpha]_D^{30} -119.29$  (*c* 0.54, CHCl<sub>3</sub>, 91% ee); HPLC (CHIRALPAC OD-H, 0.46 cm $\phi$   $\times$  25 cmL, hexanes/ethanol = 95/5, flow rate 1.0 mL/min, UV detection at 210 nm)  $t_R$  = 9.2 min (major),  $t_R$  = 10.8 min (minor).

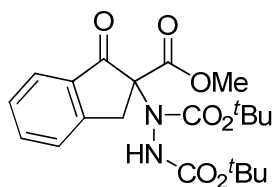

**Di-tert-butyl 1-(2-(methoxycarbonyl)-1-oxo-2,3-dihydro-1H-inden-2-yl)hydrazine-1,2-dicarboxylate (6i):** Purification by column chromatography on silica gel (hexaness/EtOAc 15/1 to 4/1); colorless oil;  $^1\text{H}$  NMR (500 MHz,  $\text{CDCl}_3$ ) see below;  $^{13}\text{C}$  NMR (125 MHz,  $\text{CDCl}_3$ ) see below; IR (neat) 3328, 2978, 1728, 1608, 1477, 1367, 1247, 1151, 1082, 1007, 853, 752  $\text{cm}^{-1}$ ; HRMS (ESI)  $[\text{M} + \text{Na}]^+$  calcd for  $\text{C}_{21}\text{H}_{28}\text{N}_2\text{O}_7$ : 443.1789; found 443.1793;  $[\alpha]_D^{25} +93.64$  (c 1.00,  $\text{CHCl}_3$ , 88% ee); HPLC (CHIRALPAC IA, 0.46  $\text{cm}\varnothing \times 25$  cmL, hexanes/2-propanol = 90/10, flow rate 1.0 mL/min, UV detection at 220 nm)  $t_R$  = 12.3 min (minor),  $t_R$  = 15.8 min (major).

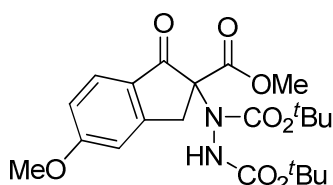

**Di-tert-butyl 1-(5-methoxy-2-(methoxycarbonyl)-1-oxo-2,3-dihydro-1H-inden-2-yl)hydrazine-1,2-dicarboxylate (6j):** Purification by column chromatography on silica gel (hexaness/EtOAc 20/1); pale yellow oil;  $^1\text{H}$  NMR (500 MHz,  $\text{CDCl}_3$ ) see below;  $^{13}\text{C}$  NMR (125 MHz,  $\text{CDCl}_3$ ) see below; IR (neat) 2978, 1717, 1600, 1490, 1367, 1257, 1151, 1082, 1007, 756  $\text{cm}^{-1}$ ; HRMS (ESI)  $[\text{M} + \text{Na}]^+$  calcd for  $\text{C}_{22}\text{H}_{30}\text{N}_2\text{O}_8$ : 473.1894; found 473.1904;  $[\alpha]_D^{25} +116.28$  (c 1.00,  $\text{CHCl}_3$ , 90% ee); HPLC (CHIRALPAC IA, 0.46  $\text{cm}\varnothing \times 25$  cmL, hexanes/2-propanol = 90/10, flow rate 0.5 mL/min, UV detection at 220 nm)  $t_R$  = 35.5 min (minor),  $t_R$  = 40.8 min (major).

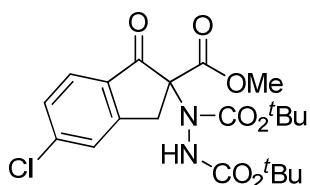

**Di-tert-butyl 1-(5-chloro-2-(methoxycarbonyl)-1-oxo-2,3-dihydro-1H-inden-2-yl)hydrazine-1,2-dicarboxylate (6k):** Purification by column chromatography on silica gel (hexaness/EtOAc 40/1 to 4/1); pale yellow oil;  $^1\text{H}$  NMR (500 MHz,  $\text{CDCl}_3$ ) see below;  $^{13}\text{C}$  NMR (125 MHz,  $\text{CDCl}_3$ ) see below; IR (neat) 3329, 2979, 1732, 1600, 1456, 1368, 1248, 1205, 1151, 1070, 1008, 901, 851, 756  $\text{cm}^{-1}$ ; HRMS (ESI)  $[\text{M} + \text{Na}]^+$  calcd for  $\text{C}_{21}\text{H}_{27}\text{ClN}_2\text{O}_7$ : 477.1399; found 477.1403;  $[\alpha]_D^{25} +88.96$  (c 1.00,  $\text{CHCl}_3$ , 88% ee); HPLC (CHIRALPAC IA, 0.46  $\text{cm}\varnothing \times 25$  cmL, hexanes/2-propanol = 97/3, flow rate 0.8 mL/min, UV detection at 220 nm)  $t_R$  = 29.9 min (major),  $t_R$  = 41.9 min (minor).

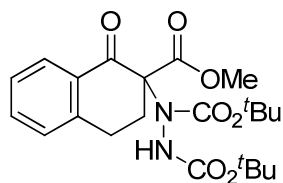

**Di-tert-butyl 1-(2-(methoxycarbonyl)-1-oxo-1,2,3,4-tetrahydronaphthalen-2-yl)hydrazine-1,2-dicarboxylate (6l):** Purification by column chromatography on silica gel (hexaness/EtOAc 15/1 to 4/1); white needles; Mp 120-121 °C;  $^1\text{H}$  NMR (500 MHz,  $\text{CDCl}_3$ ) see below;  $^{13}\text{C}$  NMR (125 MHz,  $\text{CDCl}_3$ ) see below; IR (neat) 2978, 1721, 1602, 1481, 1455, 1368, 1298, 1238, 1155, 1054, 853, 756, 573  $\text{cm}^{-1}$ ; HRMS (ESI)  $[\text{M} + \text{Na}]^+$  calcd for  $\text{C}_{22}\text{H}_{30}\text{N}_2\text{O}_7$ : 457.1945; found 457.1950;  $[\alpha]^{23}_{\text{D}} +24.04$  (c 1.00,  $\text{CHCl}_3$ , 90% ee); HPLC (CHIRALPAC IA, 0.46  $\text{cm}\varnothing \times 25 \text{ cmL}$ , hexanes/2-propanol = 80/20, flow rate 1.0 mL/min, UV detection at 220 nm)  $t_R = 8.8 \text{ min}$  (major),  $t_R = 12.8 \text{ min}$  (minor).

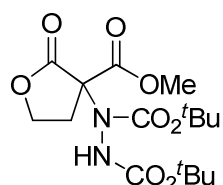

**Di-tert-butyl 1-(3-(methoxycarbonyl)-2-oxotetrahydrofuran-3-yl)hydrazine-1,2-dicarboxylate (6m):** Purification by column chromatography on silica gel (hexaness/EtOAc 15/1 to 9/1); white solid; Mp 151-152 °C;  $^1\text{H}$  NMR (500 MHz,  $\text{CDCl}_3$ ) see below;  $^{13}\text{C}$  NMR (125 MHz,  $\text{CDCl}_3$ ) see below; IR (neat) 3385, 2977, 1786, 1741, 1495, 1456, 1367, 1246, 1164, 1020, 853, 757  $\text{cm}^{-1}$ ; HRMS (ESI)  $[\text{M} + \text{Na}]^+$  calcd for  $\text{C}_{16}\text{H}_{26}\text{N}_2\text{O}_8$ : 397.1581; found 397.1583;  $[\alpha]^{24}_{\text{D}} +48.00$  (c 1.00,  $\text{CHCl}_3$ , 98% ee); HPLC (CHIRALPAC OD-H, 0.46  $\text{cm}\varnothing \times 25 \text{ cmL}$ , hexanes/2-propanol = 97/3, flow rate 0.5 mL/min, UV detection at 220 nm)  $t_R = 16.7 \text{ min}$  (minor),  $t_R = 19.1 \text{ min}$  (major).

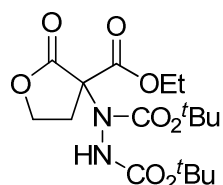

**Di-tert-butyl 1-(3-(ethoxycarbonyl)-2-oxotetrahydrofuran-3-yl)hydrazine-1,2-dicarboxylate (6n):** Purification by column chromatography on silica gel (hexaness/EtOAc 9/1 to 4/1); colorless oil;  $^1\text{H}$  NMR (500 MHz,  $\text{CDCl}_3$ ) see below;  $^{13}\text{C}$  NMR (125 MHz,  $\text{CDCl}_3$ ) see below; IR (neat) 3332, 2979, 1789, 1739, 1480, 1368, 1260, 1155, 1091, 1027, 802  $\text{cm}^{-1}$ ; HRMS (ESI)  $[\text{M} + \text{Na}]^+$  calcd for  $\text{C}_{17}\text{H}_{28}\text{N}_2\text{O}_8$ : 411.1738; found 411.1741;  $[\alpha]^{25}_{\text{D}} +37.10$  (c 0.63,  $\text{CHCl}_3$ , 95% ee); HPLC (CHIRALPAC IA, 0.46  $\text{cm}\varnothing \times 25 \text{ cmL}$ , hexanes/2-propanol = 97/3, flow rate 1.0 mL/min, UV detection at 220 nm)  $t_R = 13.4 \text{ min}$  (minor),  $t_R = 15.7 \text{ min}$  (major).

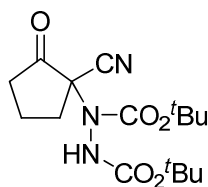

**Di-tert-butyl 1-(1-cyano-2-oxocyclopentyl)hydrazine-1,2-dicarboxylate (60):** Purification by column chromatography on silica gel (hexaness/EtOAc 15/1); white needles; Mp 139-140 °C;  $^1\text{H}$  NMR (500 MHz,  $\text{CDCl}_3$ ) see below;  $^{13}\text{C}$  NMR (125 MHz,  $\text{CDCl}_3$ ) see below; IR (neat) 3310, 2979, 1772, 1711, 1506, 1369, 1257, 1153, 955, 848, 759  $\text{cm}^{-1}$ ; HRMS (ESI)  $[\text{M} + \text{Na}]^+$  calcd for  $\text{C}_{16}\text{H}_{25}\text{N}_3\text{O}_5$ : 362.1686; found 362.1692;  $[\alpha]_D^{24} +8.96$  (c 1.00,  $\text{CHCl}_3$ , 90% ee); HPLC (CHIRALPAC IA, 0.46  $\text{cm} \times 25 \text{ cmL}$ , hexanes/2-propanol = 90/10, flow rate 1.0 mL/min, UV detection at 220 nm)  $t_R = 7.7 \text{ min}$  (major),  $t_R = 10.9 \text{ min}$  (minor).

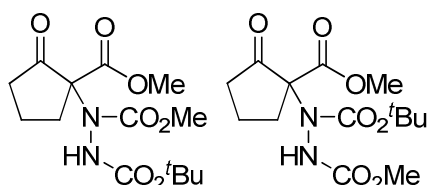

**2-tert-Butyl 1-methyl 1-(1-(methoxycarbonyl)-2-oxocyclopentyl)hydrazine-1,2-dicarboxylate (8) and 1-tert-Butyl 2-methyl 1-(1-(methoxycarbonyl)-2-oxocyclopentyl)hydrazine-1,2-dicarboxylate (9):** Purification by column chromatography on silica gel (hexaness/EtOAc 9/1 to 4/1); colorless oil; a 66:34 mixture of two regioisomers (determined by HPLC analysis, see below);  $^1\text{H}$  NMR (500 MHz,  $\text{CDCl}_3$ ) see below;  $^{13}\text{C}$  NMR (125 MHz,  $\text{CDCl}_3$ ) see below; IR (neat) 3328, 2978, 1734, 1456, 1367, 1244, 1154, 998, 756  $\text{cm}^{-1}$ ; HRMS (ESI)  $[\text{M} + \text{Na}]^+$  calcd for  $\text{C}_{14}\text{H}_{22}\text{N}_2\text{O}_7$ : 353.1319; found 353.1326; HPLC (CHIRALPAC IA, 0.46  $\text{cm} \times 25 \text{ cmL}$ , hexanes/ethanol = 95/5, flow rate 1.0 mL/min, UV detection at 210 nm) major regioisomer:  $t_R = 10.3 \text{ min}$  (minor),  $t_R = 13.3 \text{ min}$  (major); minor regioisomer:  $t_R = 11.3 \text{ min}$  (minor),  $t_R = 18.8 \text{ min}$  (major).

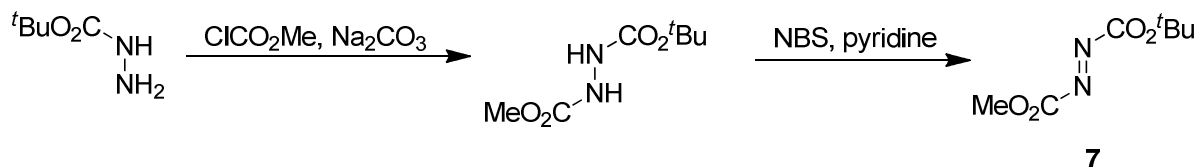

**Synthesis of *tert*-butyl methyl azodicarboxylate (7).**<sup>14</sup> A solution of *tert*-butyl carbazate (1.0 g, 7.6 mmol, 1.0 equiv) in 15 mL of CH<sub>2</sub>Cl<sub>2</sub> was cooled at -78 °C while methyl chloroformate (0.70 mL, 0.86 g, 9.1 mmol, 1.2 equiv) was added dropwise over 5 min. Sodium carbonate (0.802 g, 7.6 mmol, 1.0 equiv) was then added in one portion. The reaction mixture was allowed to warm to rt and stirred for 24 h, then filtered through a pad of Celite with the aid of CH<sub>2</sub>Cl<sub>2</sub> and concentrated to give 1.297 g (90% yield) of *tert*-butyl methyl hydrazinedicarboxylate<sup>15</sup> as a white solid: Mp 102-104 °C (Lit.<sup>15</sup> 101-101.5 °C); <sup>1</sup>H NMR (500 MHz, CDCl<sub>3</sub>) δ 6.37 (br s, 1H), 6.26 (br s, 1H), 3.76 (s, 3H), and 1.48 (s, 9H); <sup>13</sup>C NMR (125 MHz, CDCl<sub>3</sub>) δ 157.4, 155.9, 81.4, 52.7, and 27.9; IR (neat) 3307, 2979, 1715, 1508, 1368, 1245, 1161, and 1062 cm<sup>-1</sup>; HRMS (ESI) [M + Na]<sup>+</sup> calcd for C<sub>7</sub>H<sub>14</sub>N<sub>2</sub>O<sub>4</sub>: 213.0846; found 213.0847. To a solution of *tert*-butyl methyl hydrazinedicarboxylate (0.476 g, 2.50 mmol, 1.0 equiv) and pyridine (0.20 mL, 0.20 g, 2.5 mmol, 1.0 equiv) in 6 mL of CH<sub>2</sub>Cl<sub>2</sub> was added *N*-bromosuccinimide (0.445 g, 2.50 mmol, 1.0 equiv). The reaction mixture was stirred at rt for 20 min and then diluted with 30 mL of CH<sub>2</sub>Cl<sub>2</sub>. This was then washed with two 40-mL portions of H<sub>2</sub>O, 40 mL of 1M NaOH solution, 40 mL of sat NaCl solution, dried over MgSO<sub>4</sub>, filtered, and then concentrated to 0.394 g (84% yield) of *tert*-butyl methyl azodicarboxylate (7) as an orange oil: <sup>1</sup>H NMR (500 MHz, CDCl<sub>3</sub>) δ 4.07 (s, 3H), and 1.63 (s, 9H); <sup>13</sup>C NMR (125 MHz, CDCl<sub>3</sub>) δ 160.9, 158.9, 87.1, 55.3, and 27.6; IR (neat) 2986, 1778, 1458, 1438, 1398, 1373, 1249, and 1150 cm<sup>-1</sup>; HRMS (ESI) [2M + Na]<sup>+</sup> calcd for C<sub>7</sub>H<sub>12</sub>N<sub>2</sub>O<sub>4</sub>: 399.1486; found 399.1468.

## Determination of the absolute stereochemistry of hydrazination products **6b** and **6e**.

### (a) Discussion

We are interested in the determination of the absolute stereochemistry of our hydrazination products to aid our study on the mechanism of asymmetric induction by the squaramide catalysts. A survey of the literature showed that a number of X-ray crystal structures have been solved to assign absolute configurations of these types of compounds. These reports are the following: (a) Jørgensen et al.<sup>16</sup> reported (*R*) configuration for compound **11** by solving the X-ray crystal structure of derivative **12**. In the same work, cyclic  $\beta$ -keto esters were also used as substrates but the absolute stereochemistry of those products was not discussed; (b) Ma et al.<sup>17</sup> analyzed the X-ray crystal structure of pyrazolidine derivative **13**, of which the stereochemistry at C-3 was controlled by the same Lewis acid catalyst as in Jørgensen's work, to get to the same conclusion of (*R*) configuration at the aminated carbon (3*R*); (c) Vallribera et al.<sup>18</sup> examined these reactions with related catalysts and cyclic  $\beta$ -keto esters as substrates. Absolute stereochemistry of (*R*) for compound **6e** was assigned based on X-ray crystal structure of hydrazone **14**. In the same paper, the authors also studied reaction of  $\beta$ -keto ester **15** and the X-ray crystal structure of the hydrazination product was reported to show (*R*) configuration at the amino center.

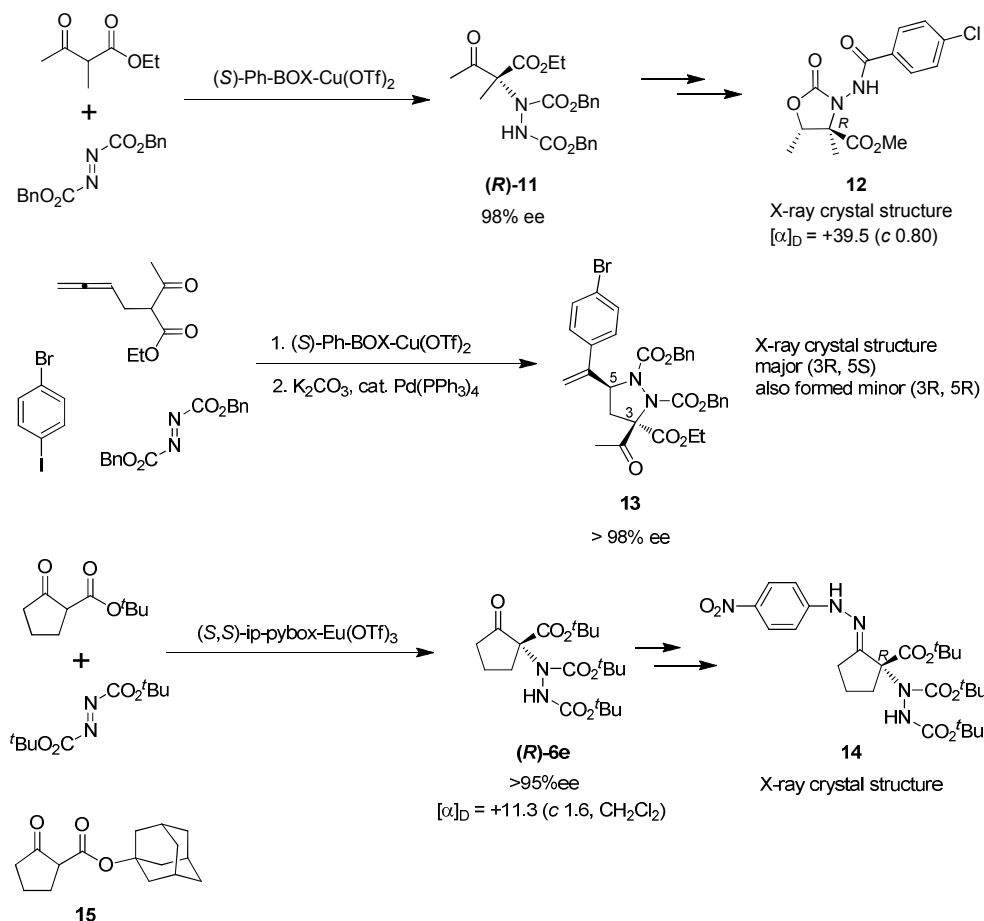

A number of papers have since assigned the absolute stereochemistry of these amination products from their respective studies by correlation of optical rotation. Of these reports two showed the detail of their analysis including optical rotation data. The work of Terada et al.<sup>12</sup> used both acyclic and cyclic  $\beta$ -

keto esters as substrates and the absolute stereochemistry of both types of products was assigned. For product **6c** from a cyclic substrate, derivative **16** was synthesized for the assignment of stereochemistry. To obtain the optical rotation value for compound **16** of known absolute stereochemistry, compound **18** was independently synthesized from amination product **17**, which was assigned (*R*) configuration by comparison of optical rotation data reported by Jørgensen et al.. This assignment is based on the assumption that acyclic and cyclic  $\beta$ -keto esters received the same sense of asymmetric induction in Jørgensen's work. This assignment for compound **17** allowed the amino center of derivative **16** to be assigned (*R*) configuration by correlation and similarly for compound **6c**. Intriguingly, product **19** from an acyclic  $\beta$ -keto ester substrate was converted to derivative **20** and assigned (*S*) configuration based on correlation with compound **12** in Jørgensen's report. As a result, Terada et al. reported that acyclic and cyclic  $\beta$ -keto esters provided products with opposite enantioselection under chiral guanadine catalysis, whereas this conclusion was based on the assumption that acyclic and cyclic  $\beta$ -keto esters produced products with the same enantioselection under chiral Lewis acid catalysis. Maruoka et al.<sup>19</sup> later reported both compounds **6c** and **6e** and their optical rotation data. Compound **6c** generated from chiral phosphonium salt PTC conditions was assigned (*S*) configuration by correlation to Terada's results.

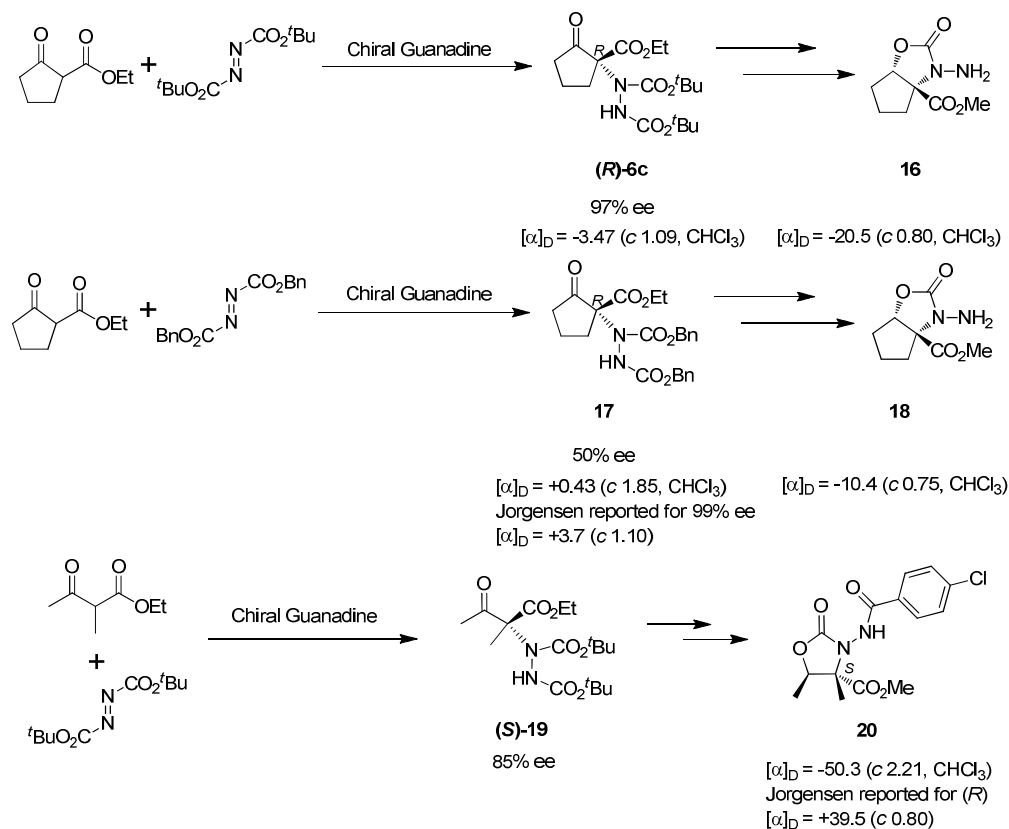

The relevant optical rotation data from literature and our work is summarized in Table 1. This comparison suggests (*S*) configuration for compound **6c** and (*R*) configuration for compound **6e** in the squaramide catalyzed reactions. We are skeptical that the steric difference of the ester groups should result in opposite enantioselection. Furthermore, there are uncertainties in both of the reported assignments. For the assignment of compound **6c** there was the assumption of analogy for fundamentally different substrate types (acyclic and cyclic). The assignment of compound **6e** relied on the X-ray

structure analysis of compound **14** which contains C, H, N, and O atoms but no heavy atoms at all. In view of these questions, we decided to assign the absolute stereochemistry of our products unambiguously.

**Table 1. Comparison of Optical Rotation Data**

| $[\alpha]$ and assignment<br>Compound                                                          | Terada                                                                              | Vallribera                                                                                         | Maruoka                                                                                            | Rawal                                                                                                                                                    |
|------------------------------------------------------------------------------------------------|-------------------------------------------------------------------------------------|----------------------------------------------------------------------------------------------------|----------------------------------------------------------------------------------------------------|----------------------------------------------------------------------------------------------------------------------------------------------------------|
| 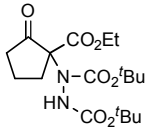<br><b>6c</b> | 97% ee, ( <i>R</i> )<br>$[\alpha]_D = -3.47$<br><i>(c</i> 1.09, CHCl <sub>3</sub> ) | NA                                                                                                 | 73% ee, ( <i>S</i> ) by correlation<br>$[\alpha]_D = +2.25$<br><i>(c</i> 1.22, CHCl <sub>3</sub> ) | 96% ee<br>$[\alpha]_D^{30} +3.52$<br><i>(c</i> 1.20, CHCl <sub>3</sub> )                                                                                 |
| 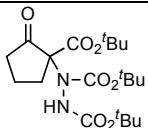<br><b>6e</b> | NA                                                                                  | > 95% ee, ( <i>R</i> )<br>$[\alpha]_D = +11.3$<br><i>(c</i> 1.6, CH <sub>2</sub> Cl <sub>2</sub> ) | 95% ee<br>$[\alpha]_D = +2.42$<br><i>(c</i> 0.88, CHCl <sub>3</sub> )                              | 94% ee<br>$[\alpha]_D^{29} +2.40$<br><i>(c</i> 0.91, CHCl <sub>3</sub> )<br>$[\alpha]_D^{31} +1.62$<br><i>(c</i> 1.60, CH <sub>2</sub> Cl <sub>2</sub> ) |

We have synthesized hydrazination products **6b** from the methyl ester and **6e** from the *tert*-butyl ester in high ee's. In preliminary work, samples of **6b** with 94% ee were obtained in reactions of  $\beta$ -keto ester **1b** with 1.1 equivalence of azodicarboxylate **5** in the presence of 0.5-1.0 mol% of catalyst **3e** in toluene at room temperature. These were used in the studies of absolute stereochemistry assignment. Initially, we attempted derivatization of **6b** by well-known chiral agents including 10-camphorsulfonyl chloride, Mosher's acid chloride, and camphanic chloride (Scheme 1). These agents are known to form crystalline (sulfonyl)esters or (sulfonyl)amides to aid the assignment of absolute configuration by X-ray crystal structure analysis. However, the synthesis and crystallization of these desired products have proven difficult.

**Scheme 1. Initial Studies for the Assignment of Absolute Stereochemistry**

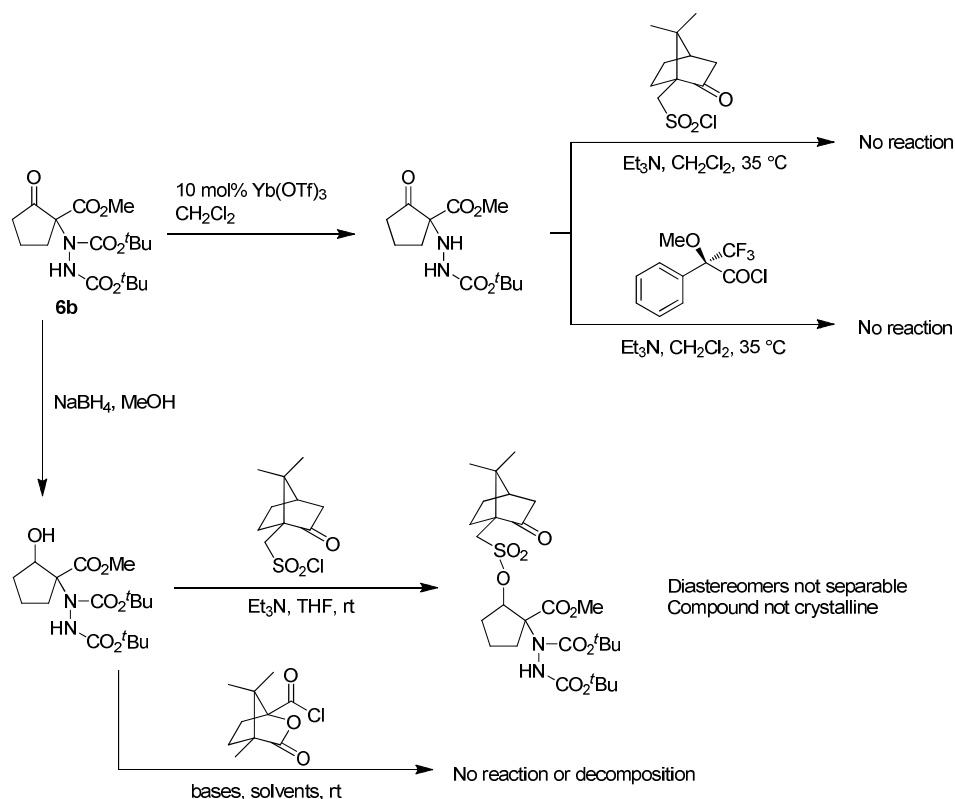

Eventually, we converted **6b** to amine **21**, then to amide **22** with (1*S*)-camphanic chloride. The X-ray crystal structure of amide **22** revealed (*S*) configuration at the quaternary amino center of **6b**. The optical rotation of amine **21** is correlated to Terada's report and thus confirms their assignment of (*R*) configuration for their product (–)-**6c** (which then affirms (*S*) configuration for (+)-**6c** from our squaramide catalyzed reactions, see Table 1). This also concludes that Jørgensen's hydrazination products derived from cyclic substrates indeed have (*R*) stereochemistry (from correlation of compounds **21** and **18**, then extension to compound **17**).

For compound (+)-**6e**, a similar sequence of transformation also led to amine **23**. (*S*) configuration for (+)-**6e** was then confirmed by correlation of derivative **23** to compound **21**. As a result, we can conclude that in our and Maruoka's work, both the ethyl and *tert*-butyl ester substrates provided products with (*S*) configuration at the newly formed stereocenter (Table 1). We also suggest that based on the optical rotation reported for compound **6e** by Vallribera et al.:  $[\alpha]_D = +11.3$  (*c* 1.6,  $\text{CH}_2\text{Cl}_2$ ),<sup>18</sup> their product should have (*S*) instead of the reported (*R*) configuration.

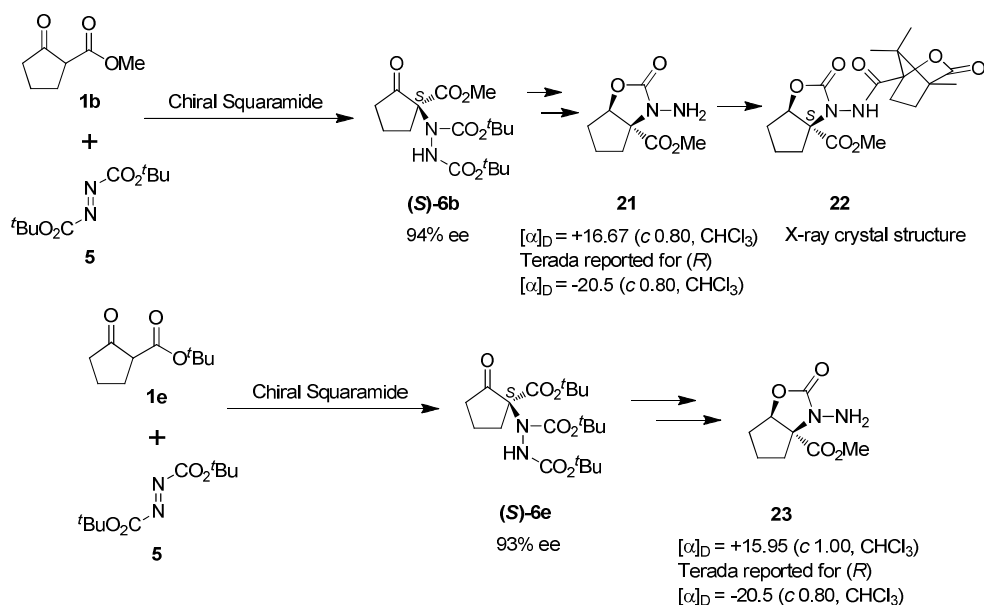

## (b) Experimental procedures

### Synthesis of amide **22** from **6b** (unoptimized).

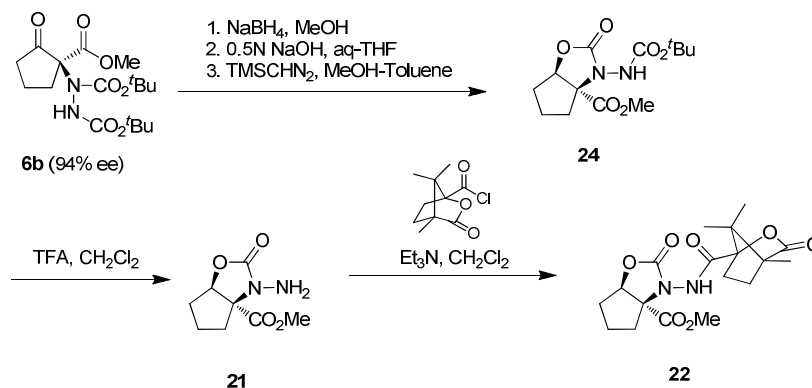

**6b** (0.390 g, 1.05 mmol, 94% ee) was converted to 0.217 g (69% yield) of known compound **24** via published procedure.<sup>12</sup> To a solution of **24** (0.190 g, 0.63 mmol) in 5 mL of CH<sub>2</sub>Cl<sub>2</sub> was added trifluoroacetic acid (1.0 mL, 1.5 g, 13 mmol). The reaction mixture was heated at 40 °C for 5 min and then stirred at rt for 30 min. The volatile was removed and the residue was diluted with 5 mL of H<sub>2</sub>O. This solution was neutralized with 10 mL of sat NaHCO<sub>3</sub> solution and then extracted with five 15-mL portions of EtOAc. The combined organic layers were washed with 15 mL of sat NaCl solution, dried over Na<sub>2</sub>SO<sub>4</sub>, filtered, and concentrated to 0.058 g of a yellow oil. This was purified by column chromatography on silica gel (hexaness/EtOAc 1/1 to 2/3) to afford 0.033 g (26% yield) of amine **21** as a very pale yellow oil. Analytical data matched previously reported values.<sup>12</sup>  $[\alpha]_D^{24} +16.67$  (c 0.80, CHCl<sub>3</sub>); Lit.<sup>12</sup>  $[\alpha]_D^{32} -20.5$  (c 0.80, CHCl<sub>3</sub>).

A solution of **21** (0.033g, 0.16 mmol, 1 equiv) in 1.6 mL of CH<sub>2</sub>Cl<sub>2</sub> was cooled at 0 °C and treated with (1S)-(-)-camphanic chloride (0.071 g, 0.33 mmol, 2 equiv) followed by Et<sub>3</sub>N (0.046 mL, 0.033 g, 0.33 mmol, 2 equiv). The resulting solution was stirred at rt for 5 h, quenched with 5 mL of sat NH<sub>4</sub>Cl

solution and then extracted with five 10-mL portions of EtOAc. The combined organic phases were washed with 10 mL of sat NaCl solution, dried over Na<sub>2</sub>SO<sub>4</sub>, filtered, and concentrated to 0.088 g of a yellow paste. This was purified by column chromatography on silica gel (hexaness/EtOAc 4/1 to 2/1) to provide 0.036 g (57% yield) of amide **22** as a white solid: Mp 142-143 °C; <sup>1</sup>H NMR (500 MHz, CDCl<sub>3</sub>) δ 8.25 (s, 1H), 4.95 (d, 1H, J = 5.6 Hz), 3.83 (s, 3H), 2.46-2.58 (m, 1H), 2.05-2.30 (m, 3H), 1.87-2.00 (m, 5H), 1.63-1.75 (m, 1H), 1.12 (s, 3H), 1.11 (s, 3H), and 1.08 (s, 3H); <sup>13</sup>C NMR (125 MHz, CDCl<sub>3</sub>) δ 177.7, 171.8, 166.9, 153.7, 91.7, 83.4, 73.5, 55.0, 54.6, 53.3, 34.4, 30.3, 28.7, 23.5, 16.3, 16.3, and 9.6; IR (film) 3296, 2967, 2881, 1784, 1740, 1707, 1497, 1446, 1397, 1317, 1284, 1243, 1125, and 1110 cm<sup>-1</sup>; HRMS (ESI) [M+H]<sup>+</sup> calcd for C<sub>18</sub>H<sub>24</sub>N<sub>2</sub>O<sub>7</sub>: 381.1656; found 381.1663; [α]<sub>D</sub><sup>24</sup> -66.54 (c 0.80, CHCl<sub>3</sub>).

### Synthesis of **23** from **6e** (unoptimized).

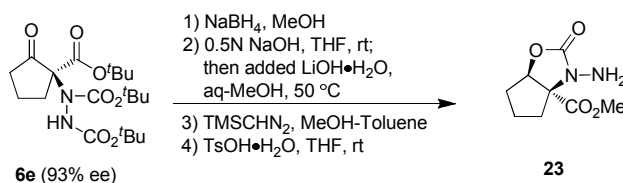

Amine **23** (0.010 g, 9% overall yield) was prepared from **6e** (0.238 g, 0.57 mmol, 93% ee) in a similar manner as the reported procedure.<sup>12</sup> Stronger basic conditions and elevated temperature was required in step 2 for the hydrolysis of the *tert*-butyl ester. Analytical data matched previously reported values.<sup>12</sup> [α]<sub>D</sub><sup>25</sup> +15.95 (c 1.00, CHCl<sub>3</sub>); Lit.<sup>12</sup> [α]<sub>D</sub><sup>32</sup> -20.5 (c 0.80, CHCl<sub>3</sub>).

**X-ray crystal structure of **22**.** Crystallization from MeOH and H<sub>2</sub>O yielded crystals of suitable quality for X-ray diffraction analysis.

### Data Collection

An irregular broken fragment (0.40 x 0.40 x 0.40 mm) was selected under a stereo-microscope while immersed in Fluorolube oil to avoid possible reaction with air. The crystal was removed from the oil using a tapered glass fiber that also served to hold the crystal for data collection. The crystal was mounted and centered on a Bruker SMART APEX system at 100 K. Rotation and still images showed the diffractions to be sharp. Frames separated in reciprocal space were obtained and provided an orientation matrix and initial cell parameters. Final cell parameters were obtained from the full data set.

A “full sphere” data set was obtained which samples approximately all of reciprocal space to a resolution of 0.75 Å using 0.3° steps in ω using 10 second integration times for each frame. Data collection was made at 100 K. Integration of intensities and refinement of cell parameters were done using SAINT.<sup>20</sup> Absorption corrections were applied using SADABS<sup>20</sup> based on redundant diffractions.

### Structure solution and refinement

The space group was determined as P2<sub>1</sub> based on systematic absences and intensity statistics. Direct methods were used to locate most C atoms from the E-map. Repeated difference Fourier maps

allowed recognition of all expected C, O and N atoms. Following anisotropic refinement of all non-H atoms, ideal H-atom positions were calculated. Final refinement was anisotropic for all non-H atoms, and isotropic-riding for H atoms. No anomalous bond lengths or thermal parameters were noted. All ORTEP diagrams have been drawn with 50% probability ellipsoids.

#### Equations of interest:

$$R_{\text{int}} = \Sigma |F_o^2 - \langle F_o^2 \rangle| / \Sigma |F_o^2|$$

$$R1 = \Sigma ||F_o| - |F_c|| / \Sigma |F_o|$$

$$wR2 = [\Sigma [w (F_o^2 - F_c^2)^2] / \Sigma [w (F_o^2)^2]]^{1/2}$$

$$\text{GooF} = S = [\Sigma [w (F_o^2 - F_c^2)^2] / (n-p)]^{1/2}$$

$$\text{where: } w = q / \sigma^2 (F_o^2) + (aP)^2 + bP;$$

$$n = \text{number of independent reflections};$$

$$q, a, b, P \text{ as defined in [1]}$$

$$p = \text{number of parameters refined.}$$

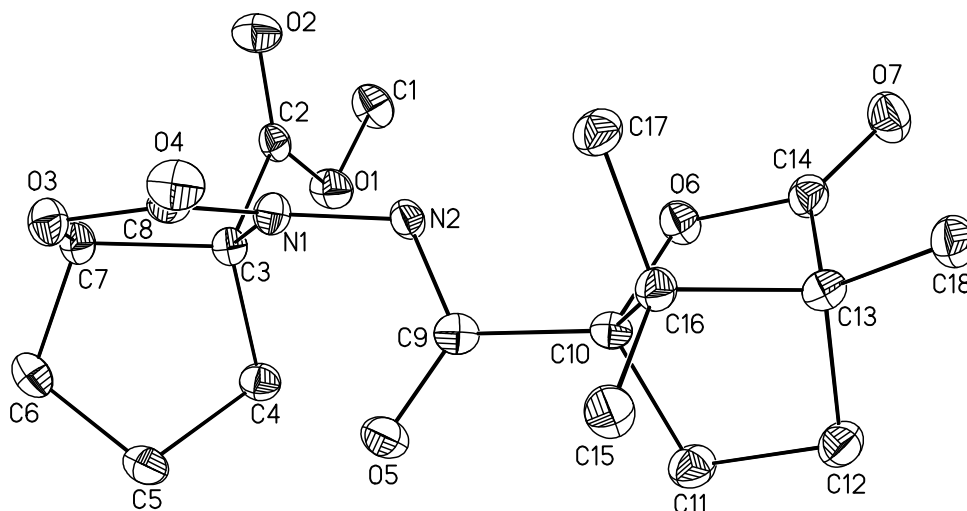

#### References

- (1) Christoffers, J.; Rößler, U.; Werner, T. *Eur. J. Org. Chem.* **2000**, 701-705.
- (2) Henderson, D.; Richardson, K. A.; Taylor, R. J. K. *Synthesis* **1983**, 996-997.
- (3) Presset, M.; Coquerel, Y.; Rodriguez, J. *J. Org. Chem.* **2009**, 74, 415-418.
- (4) Emelen, K. V.; Wit, T. D.; Hoornaert, G. J.; Compennolle, F. *Tetrahedron* **2002**, 58, 4225-4236.
- (5) Kobayashi, S.; Gustafsson, T.; Shimizu, Y.; Kiyohara, H.; Matsubara, R. *Org. Lett.* **2006**, 8, 4923-4925.
- (6) Chakrabarty, M.; Sarkar, S.; Harigaya, Y. *Synthesis* **2003**, 2292-2294.
- (7) Quesada, M. L.; Schlessinger, R. H. *J. Org. Chem.* **1978**, 43, 346-347.
- (8) Bukowska, M.; Prejzner, J. *Pol. J. Chem.* **1986**, 60, 957-959.

- (9) Liu, H.-J.; Ly, T. W.; Tai, C.-L.; Wu, J.-D.; Liang, J.-K.; Guo, J.-C.; Tseng, N.-W.; Shia, K.-S. *Tetrahedron* **2003**, *59*, 1209-1226.
- (10) Malerich, J. P.; Hagihara, K.; Rawal, V. H. *J. Am. Chem. Soc.* **2008**, *130*, 14416-14417.
- (11) Zhu, Y.; Malerich, J. P.; Rawal, V. H. *Angew. Chem. Int. Ed.* **2010**, *49*, 153-156.
- (12) Terada, M.; Nakano, M.; Ube, H. *J. Am. Chem. Soc.* **2006**, *126*, 16044-16045.
- (13) Saaby, S.; Bella, M.; Jørgensen, K. A. *J. Am. Chem. Soc.* **2004**, *126*, 8120-8121.
- (14) This procedure is a modification of the method reported in: Mackay, D.; McIntyre, D. D. *Can. J. Chem.* **1984**, *62*, 335-360.
- (15) Zecchini, G. P.; Torrini, I.; Paradisi, M. P.; Lucente, G.; Mastropietro, G.; Spisani, S. *Amino Acids* **1998**, *14*, 301-309.
- (16) Marigo, M.; Juhl, K.; Jørgensen, K. A. *Angew. Chem. Int. Ed.* **2003**, *42*, 1367-1369.
- (17) Ma, S.; Jiao, N.; Zheng, Z.; Ma, Z.; Lu, Z.; Ye, L.; Deng, Y.; Chen, G. *Org. Lett.* **2004**, *6*, 2193-2196.
- (18) Comelles, J.; Pericas, À.; Moreno-Mañas, M.; Vallribera, A.; Drudis-Solé, G.; Lledos, A.; Parella, T.; Roglans, A.; García-Granda, S.; Rocas-Fernández, L. *J. Org. Chem.* **2007**, *72*, 2077-2087.
- (19) He, R.; Wang, X.; Hashimoto, T.; Maruoka, K. *Angew. Chem. Int. Ed.* **2008**, *47*, 9466-9468.
- (20) All software and sources of scattering factors are contained in the SHELXTL (version 5.1) program library (G. Sheldrick, Bruker Analytical X-ray Systems, Madison, WI).

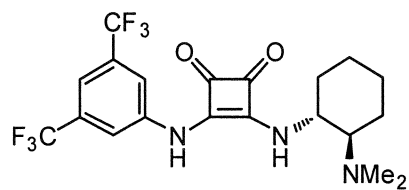

**3e** (in DMSO- $d_6$ )

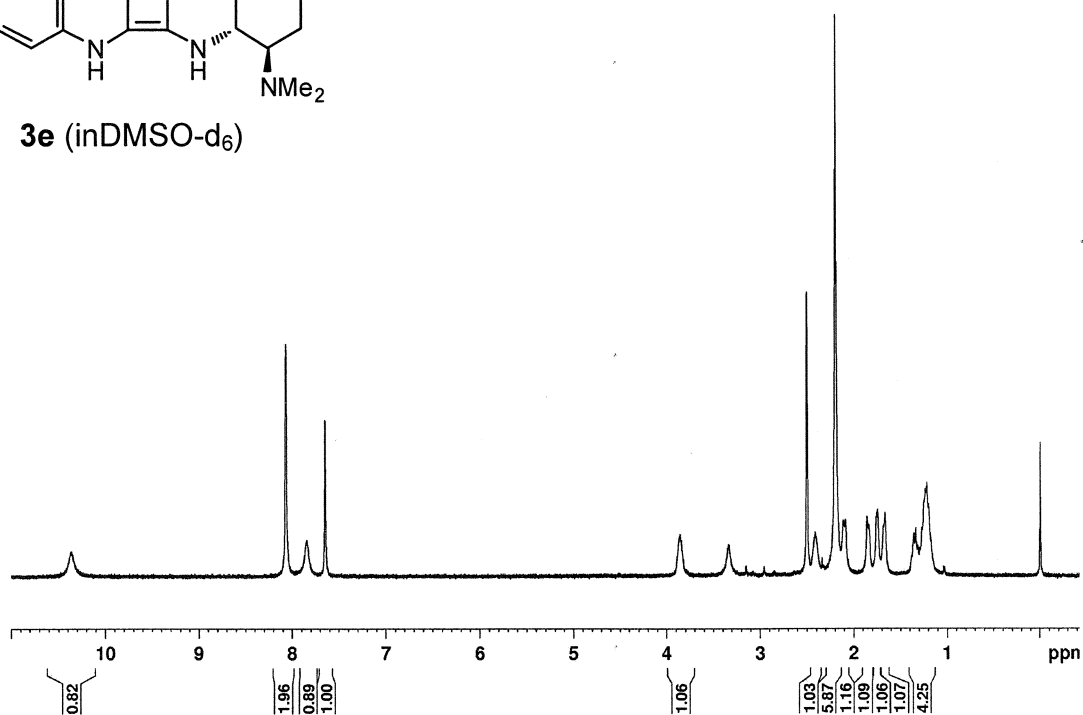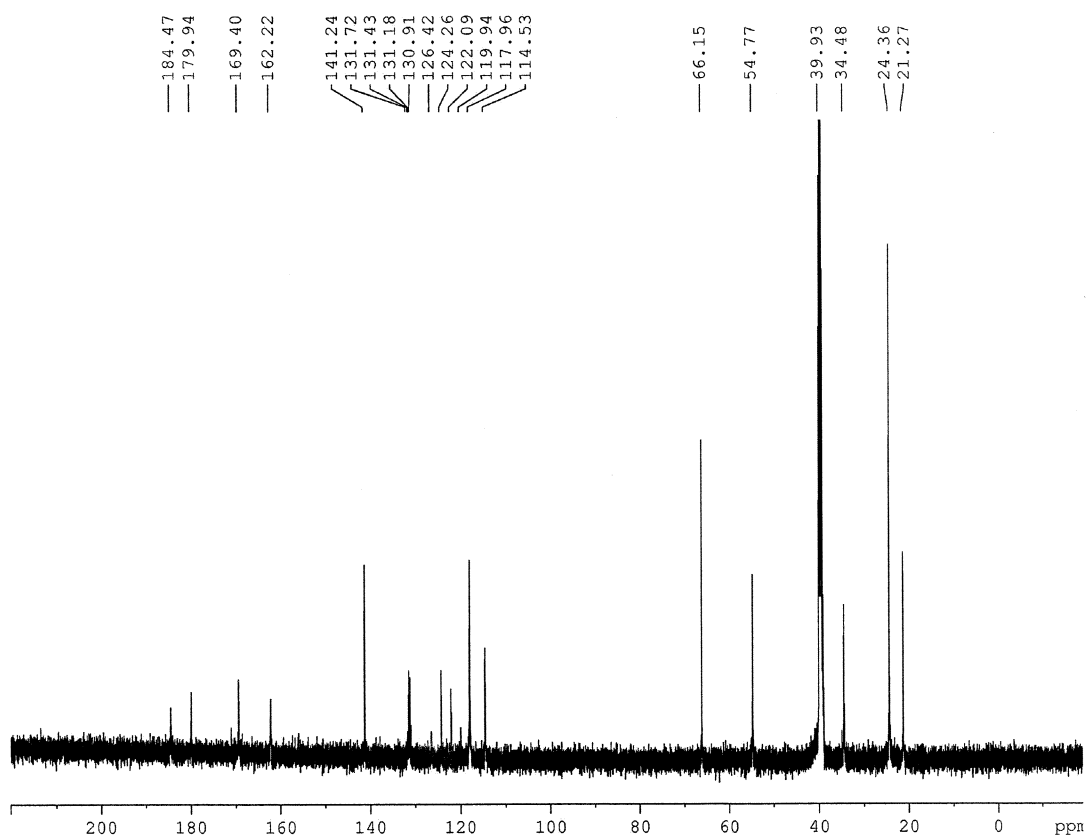

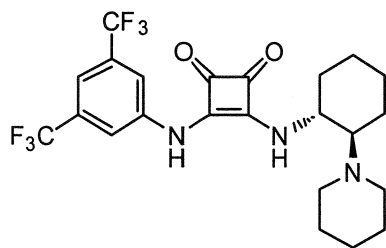

**3j** (inDMSO-d<sub>6</sub>)

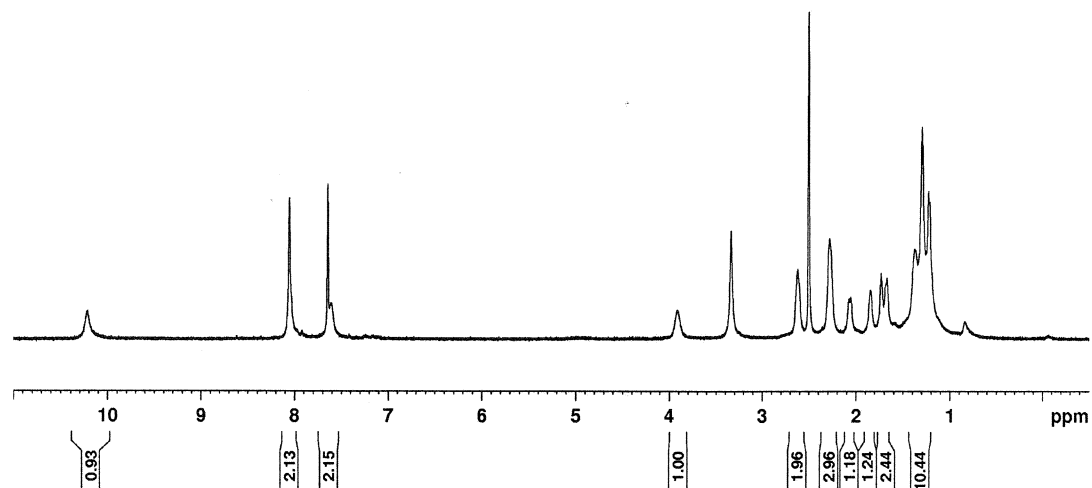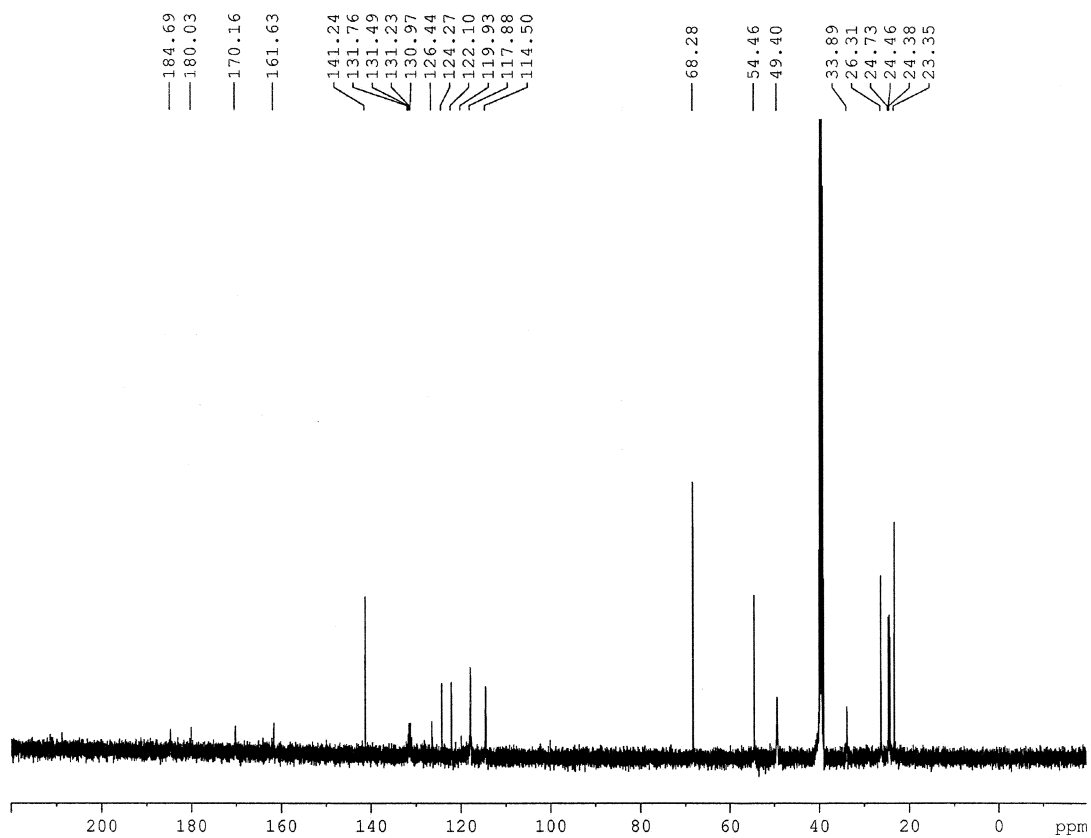

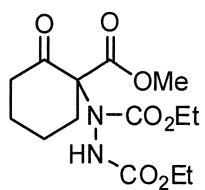

4

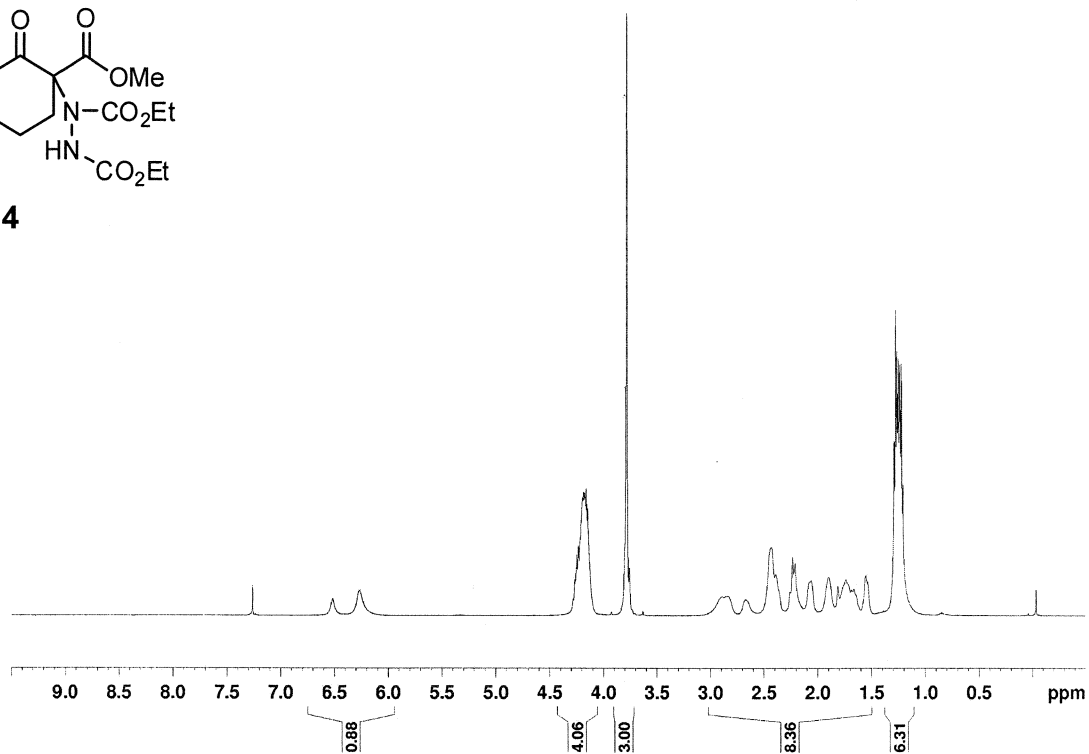

203.70  
201.61

169.60  
157.81  
156.96  
156.50

79.02  
78.30  
63.69  
63.22  
62.18  
62.11  
53.04  
52.80  
39.92  
39.77  
34.75  
28.81  
27.38  
20.70  
20.07  
14.32  
14.09

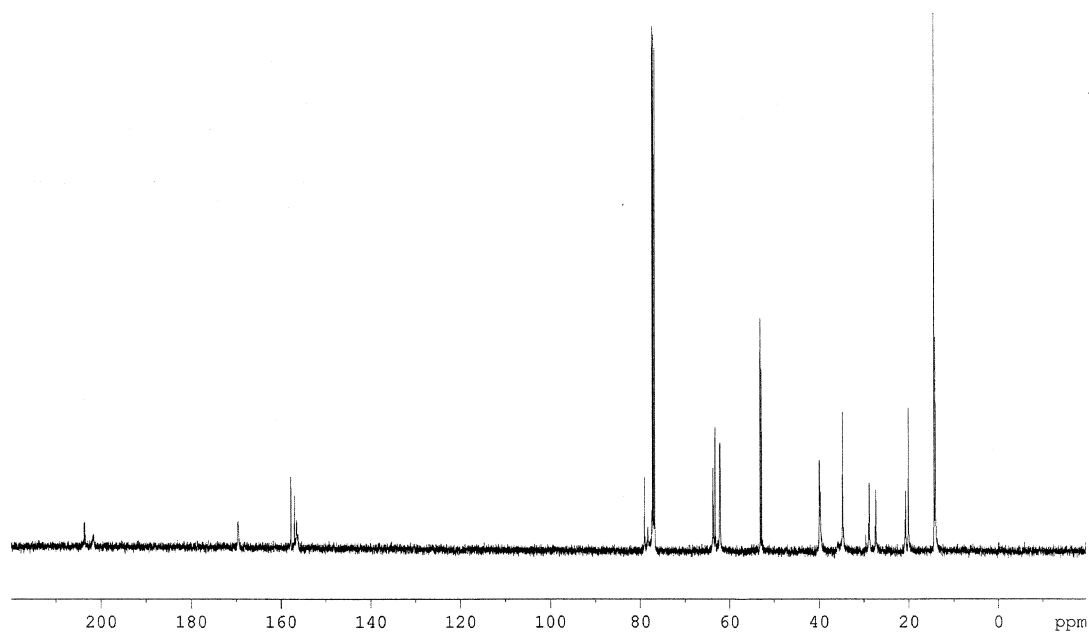

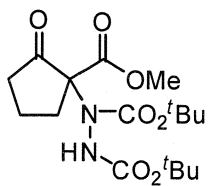

**6b**

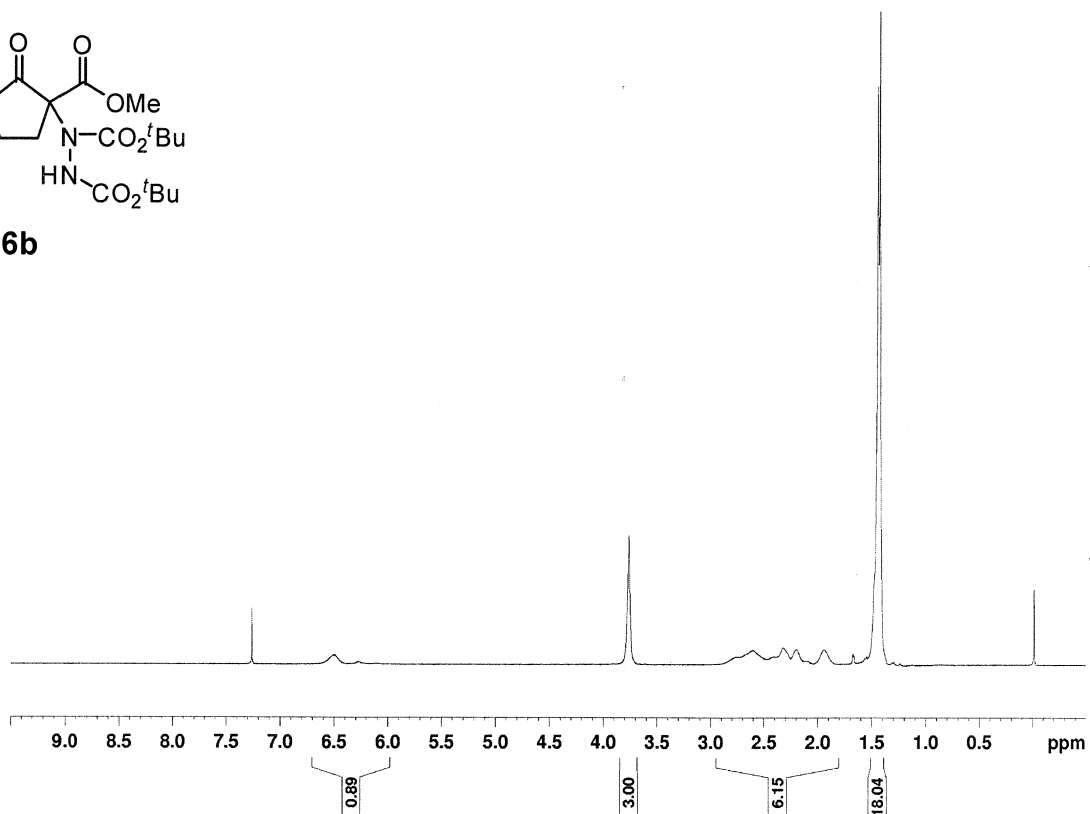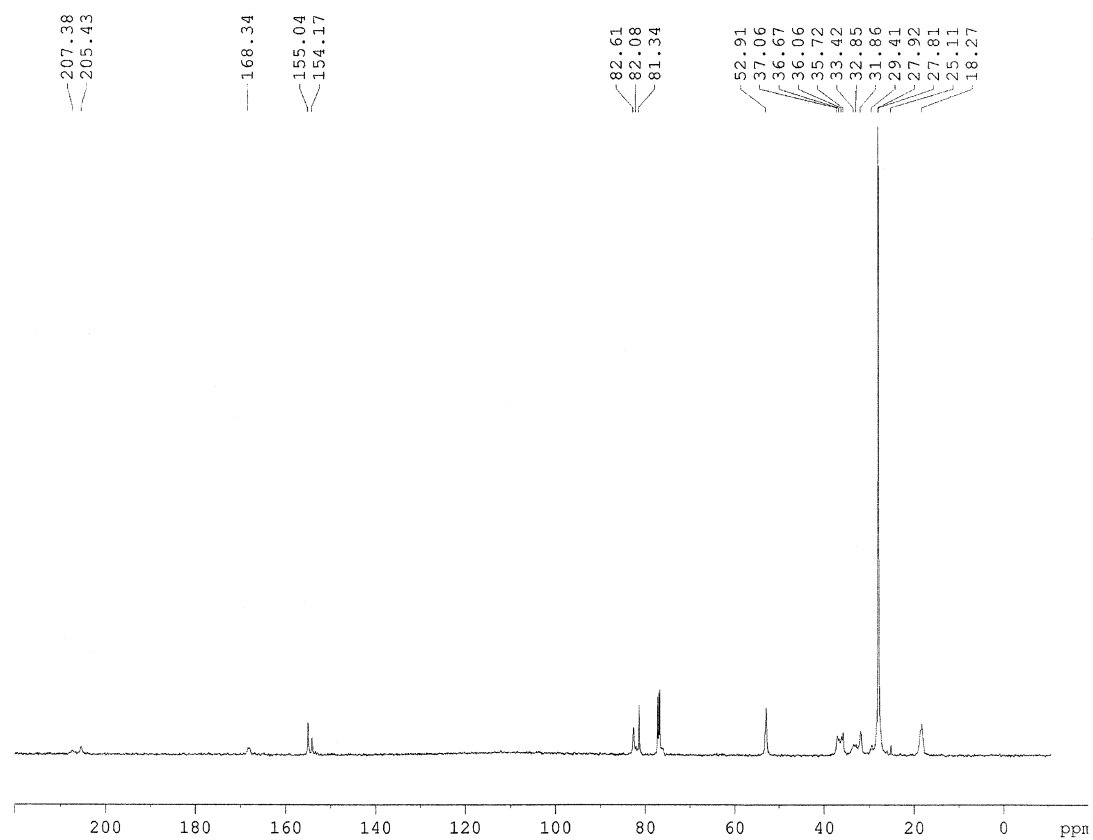

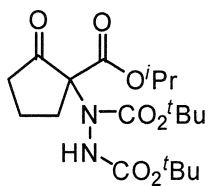

6d

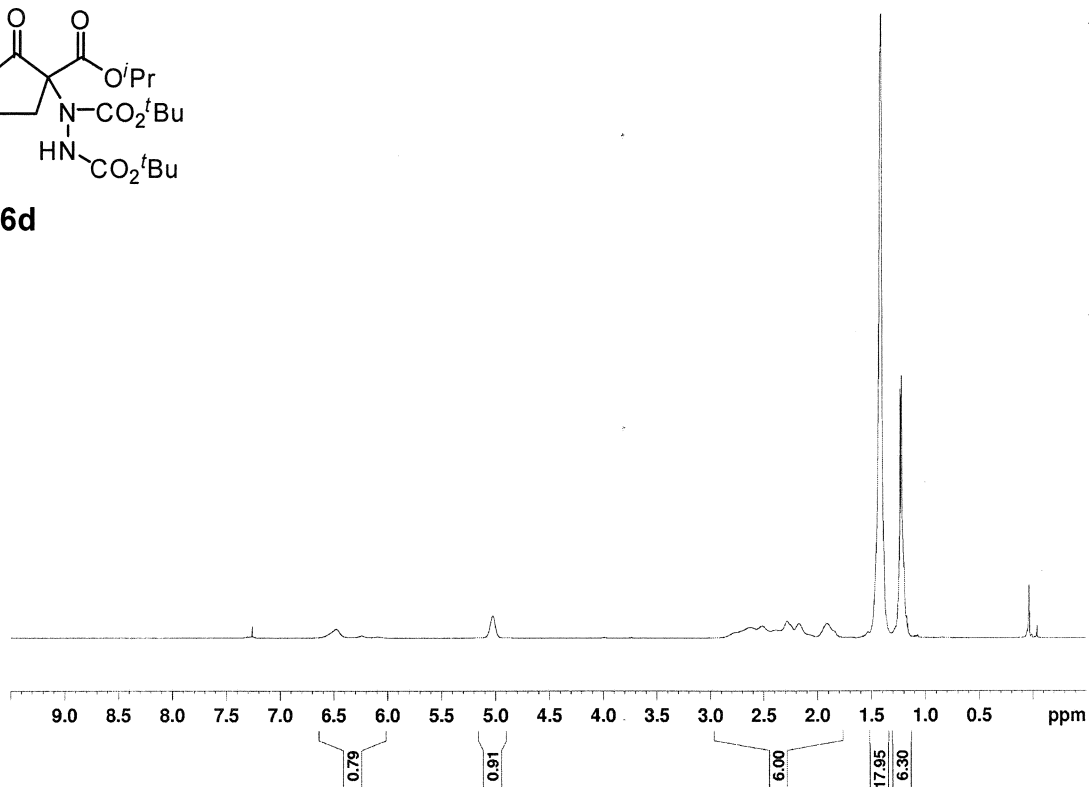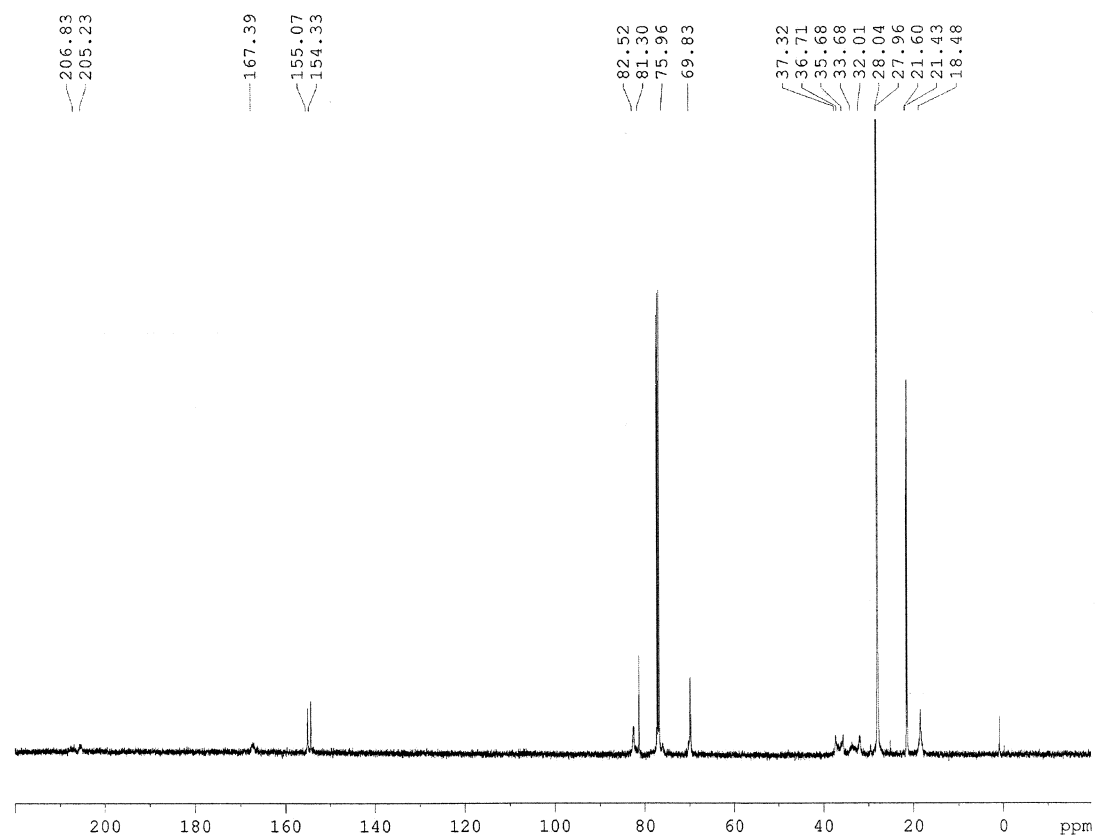

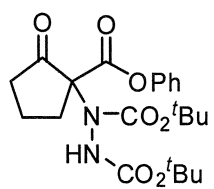

6f

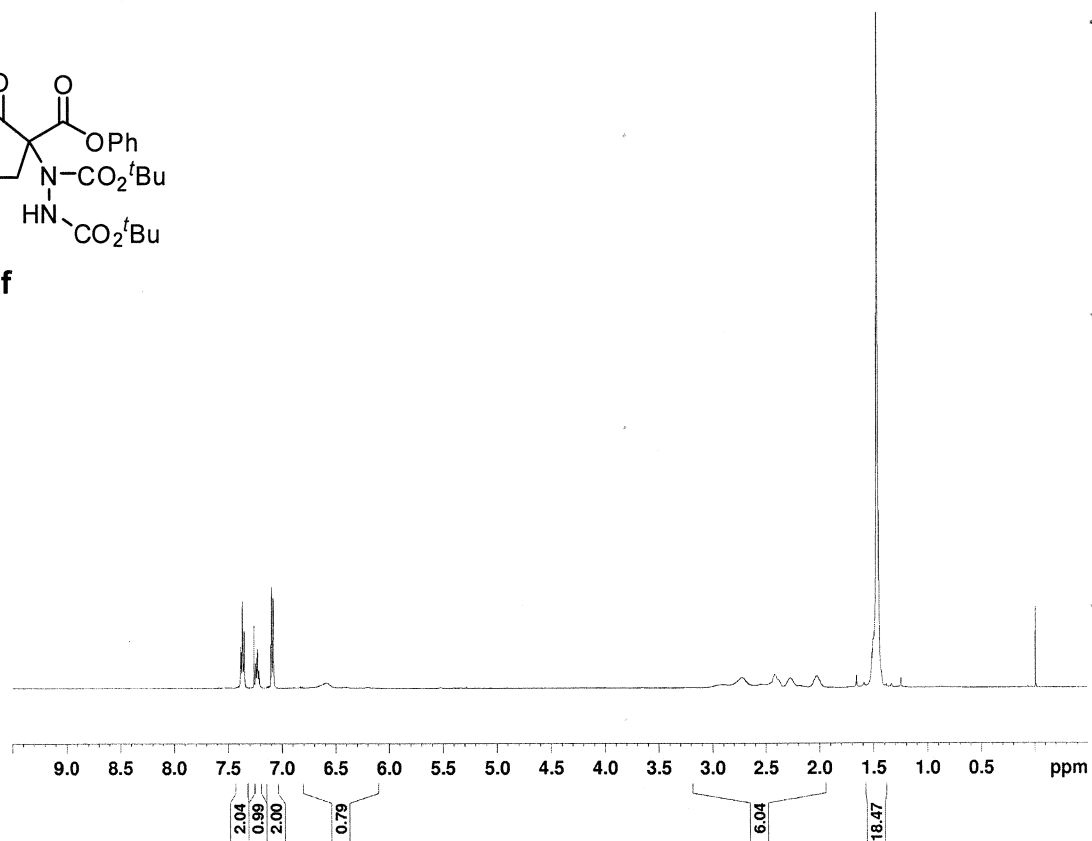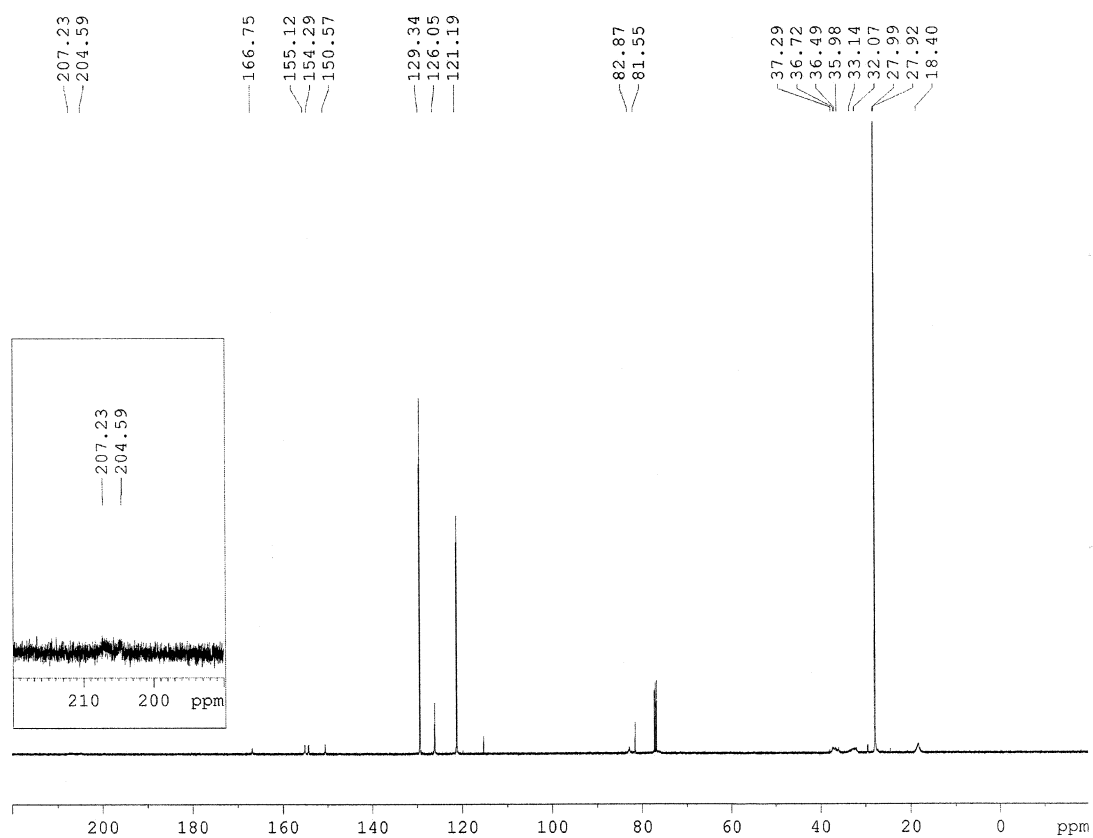

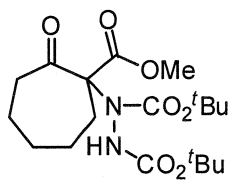

6g

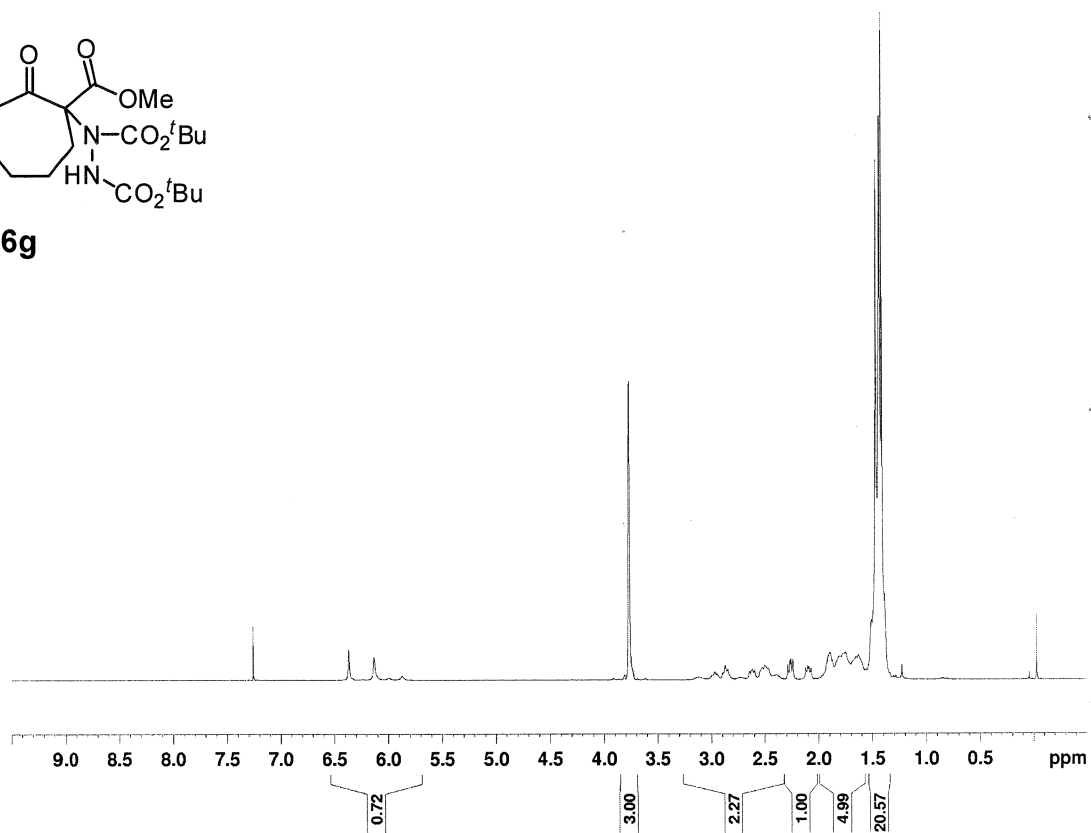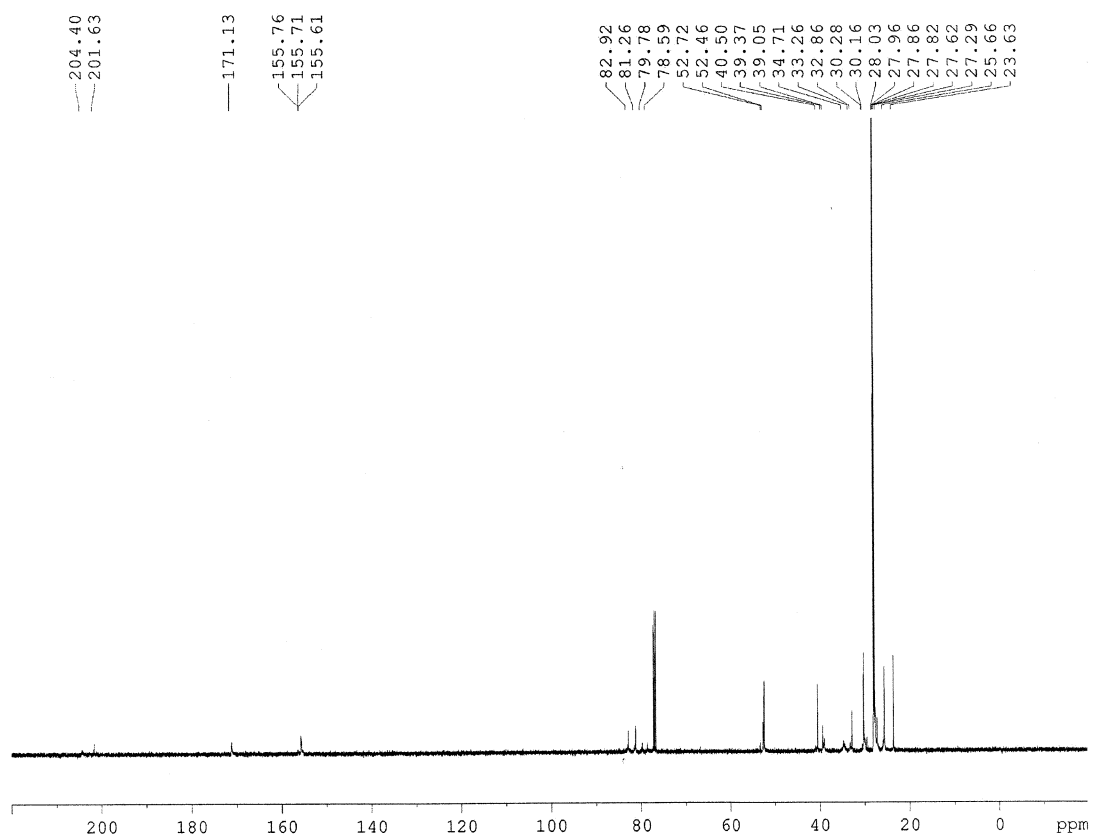

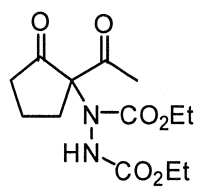

6h

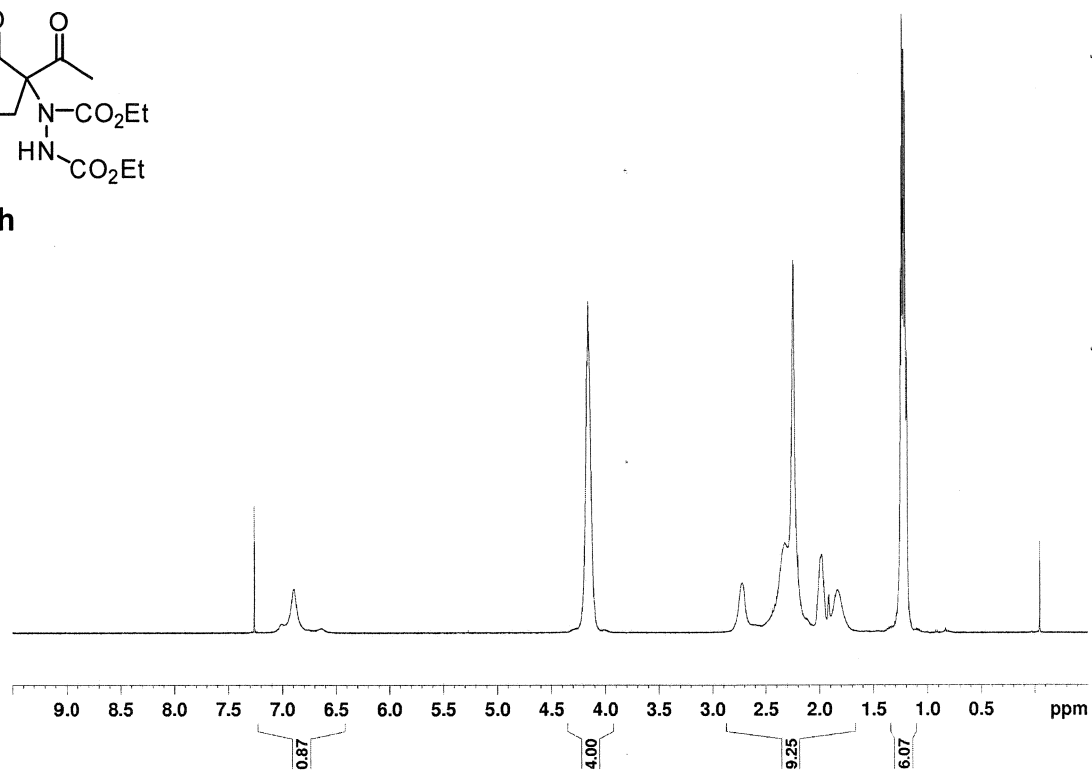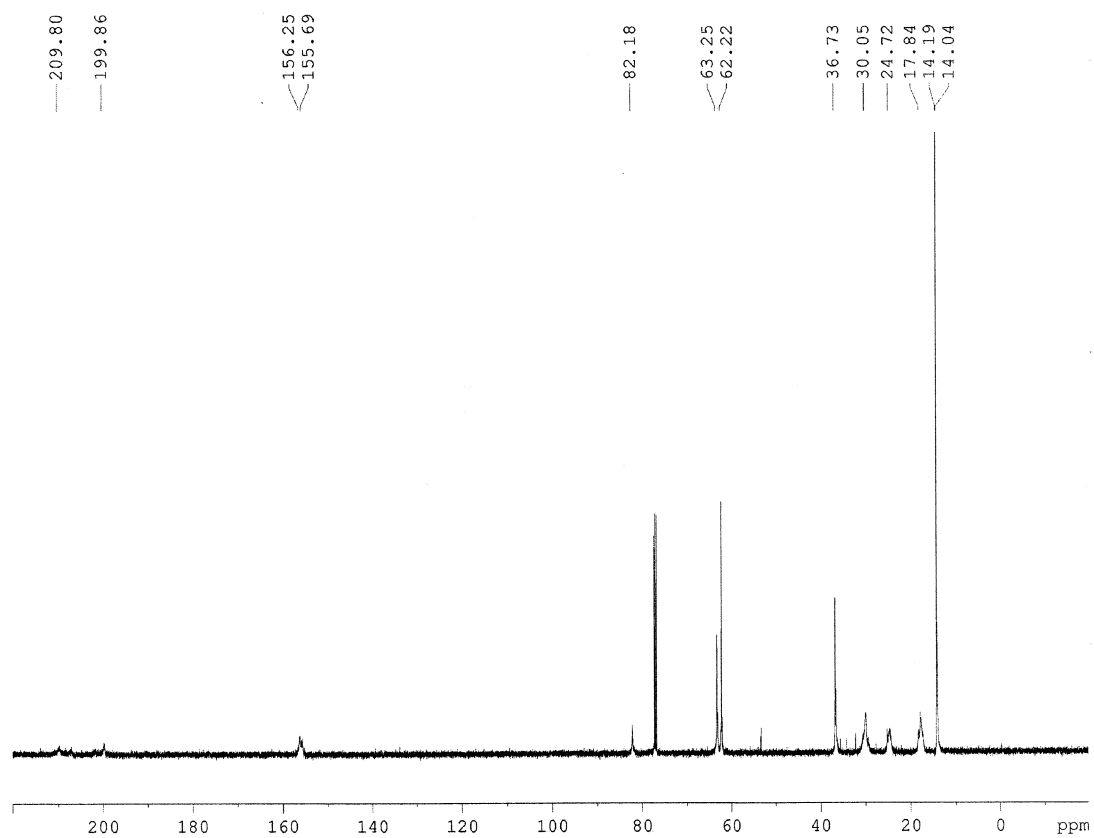

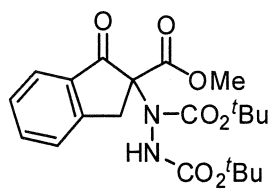

**6i**

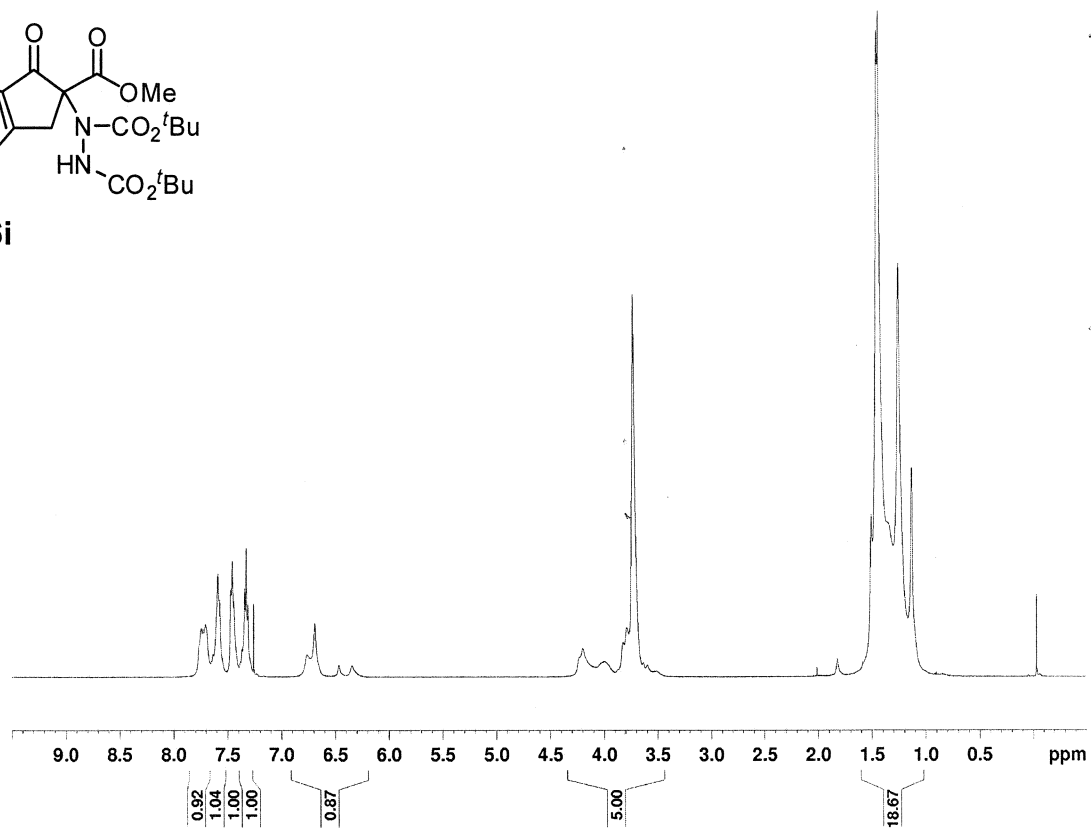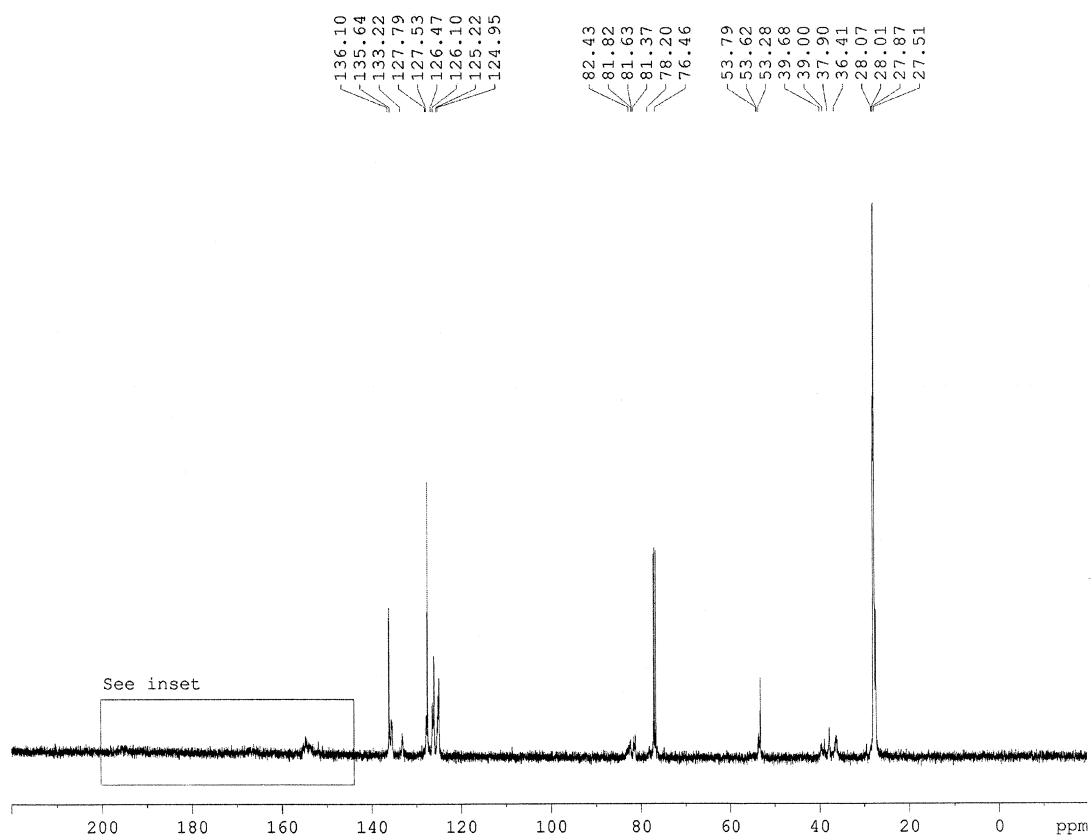

Inset for Compound **6i**

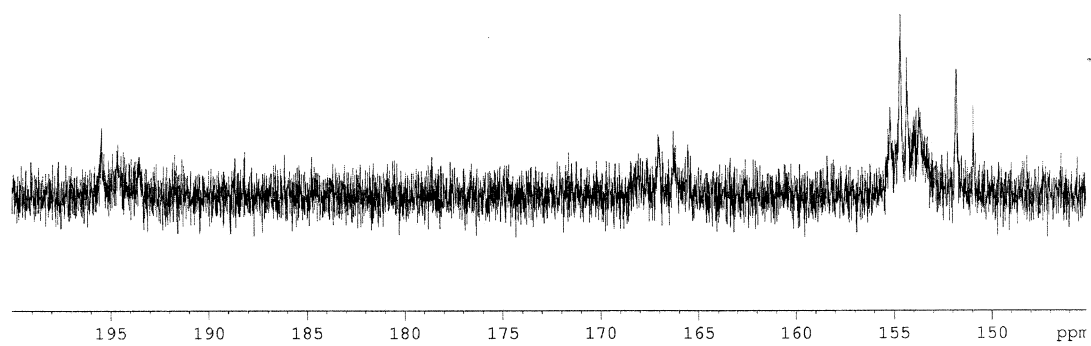

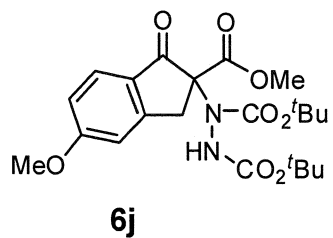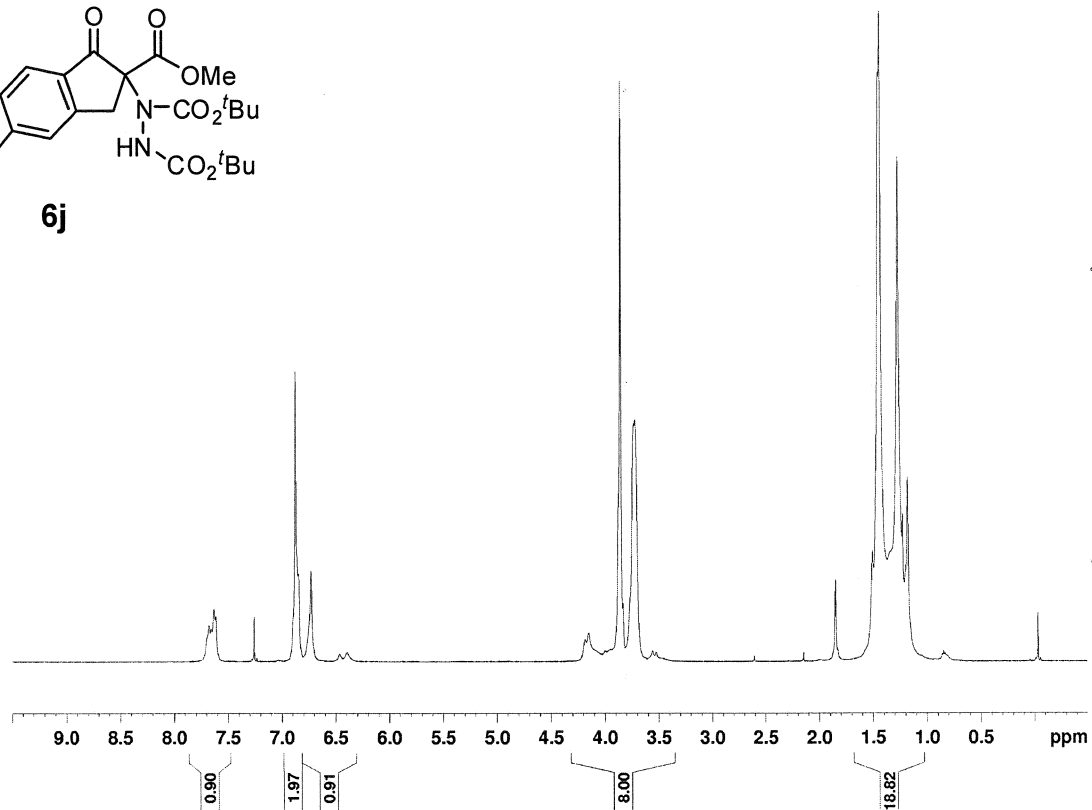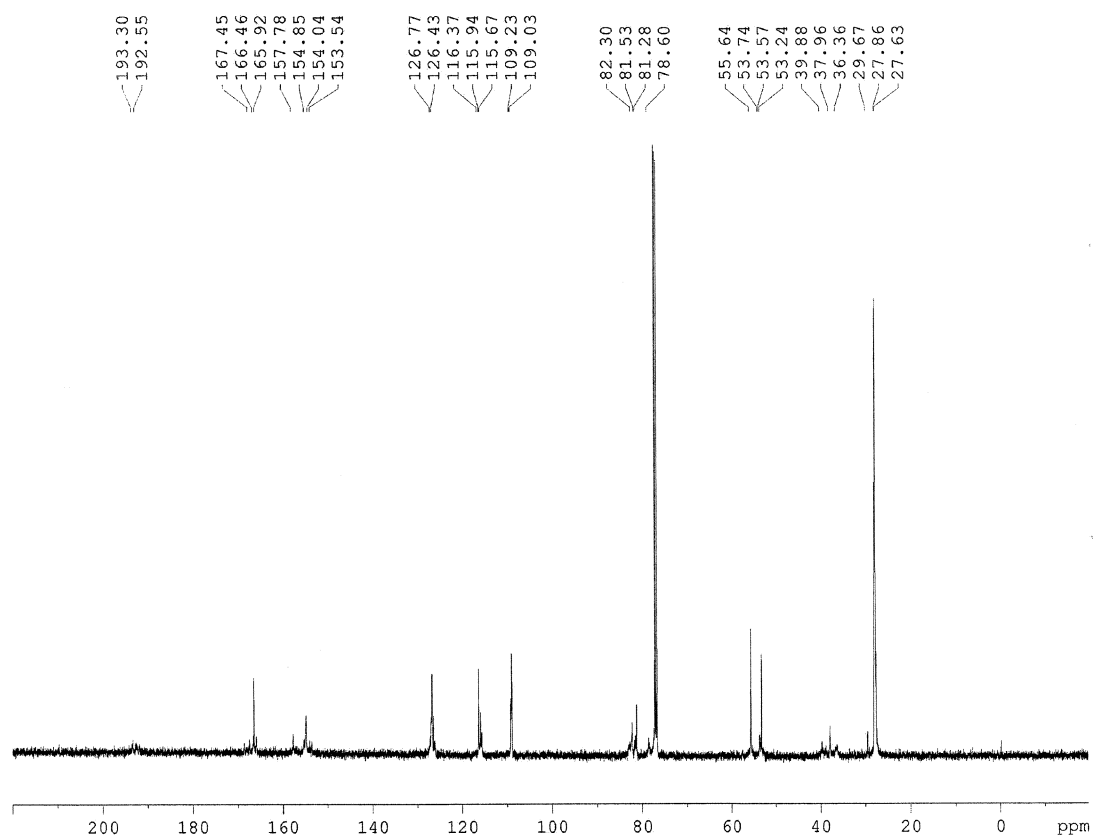

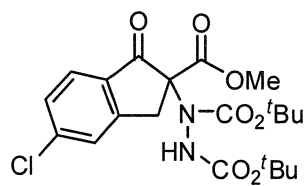

**6k**

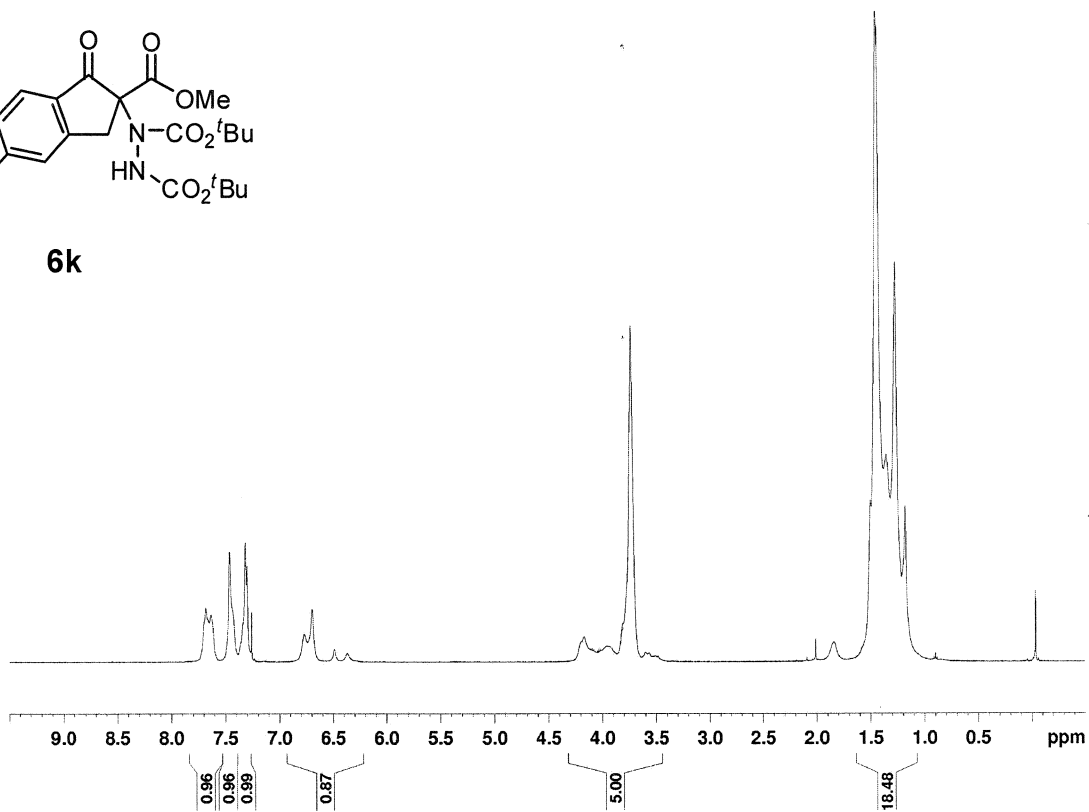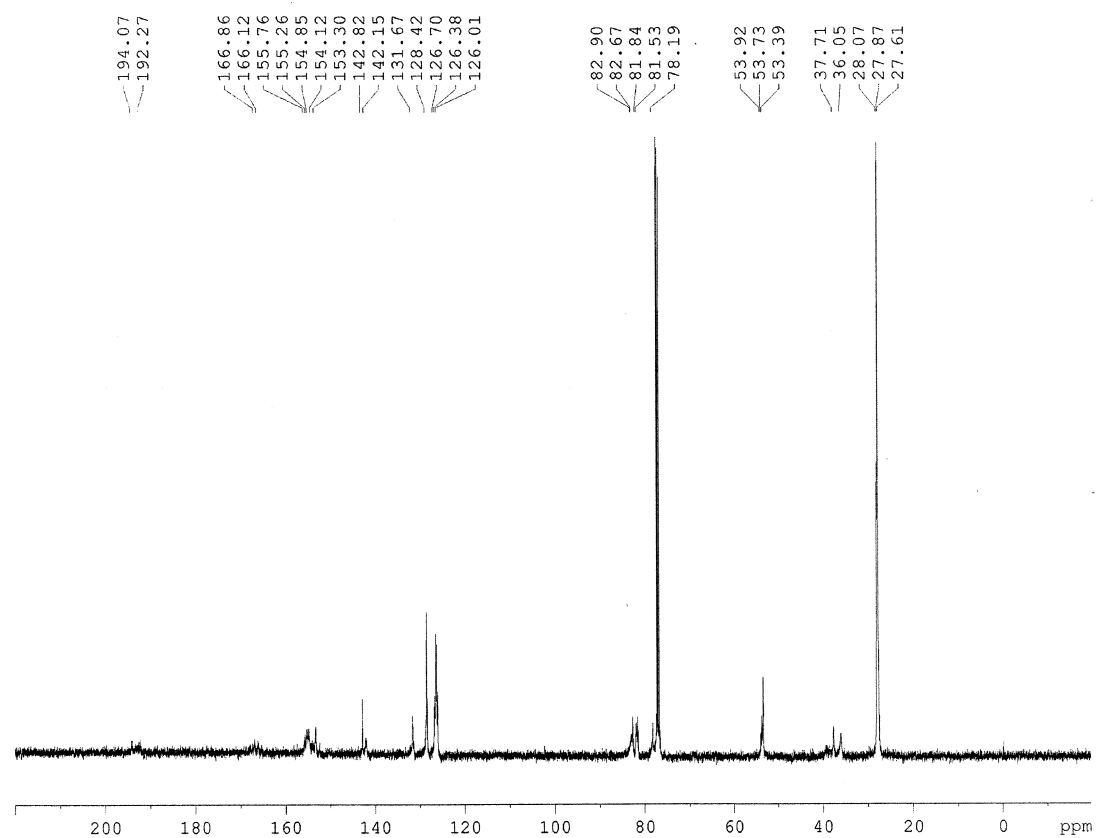

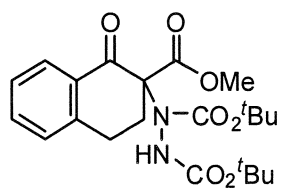

6l

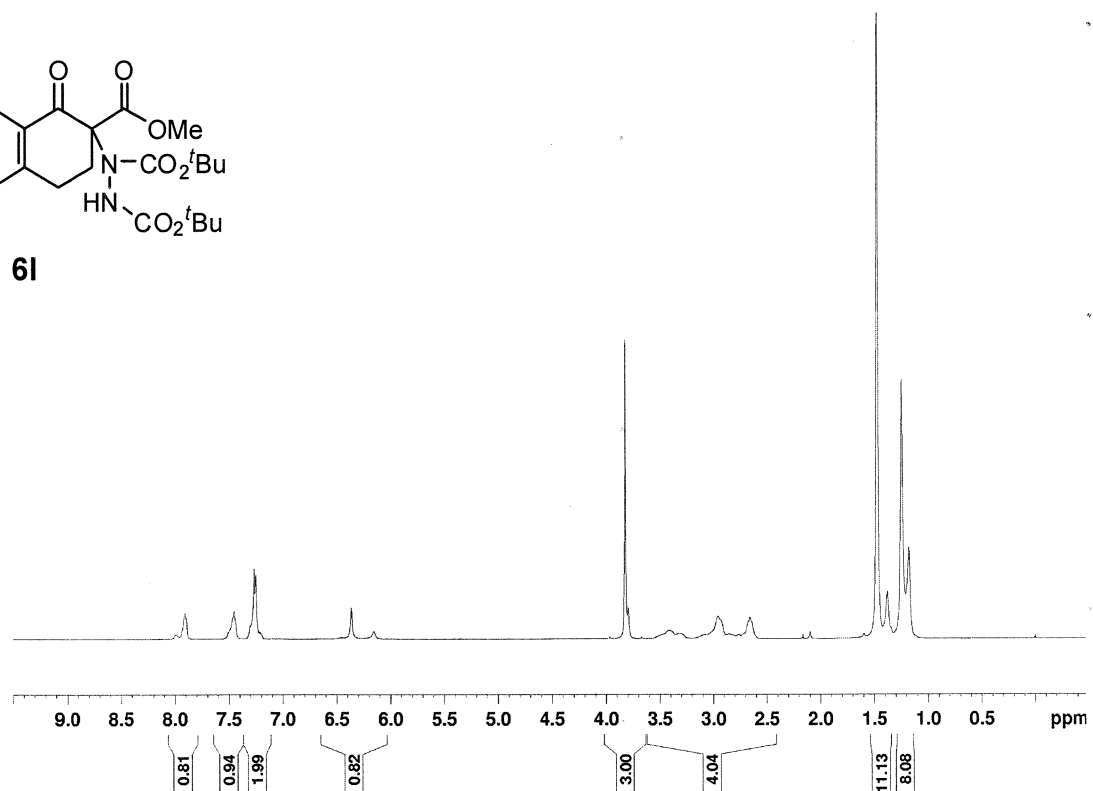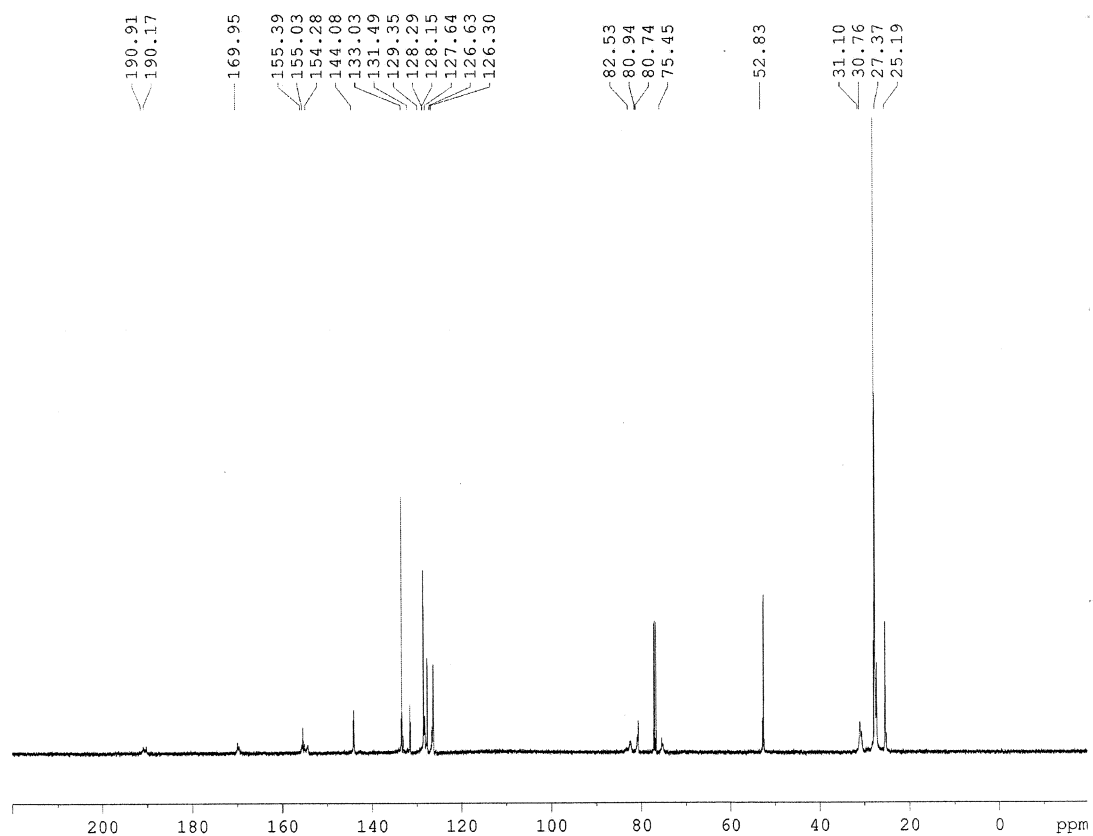

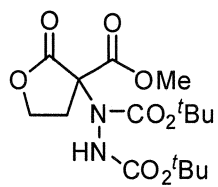

**6m**

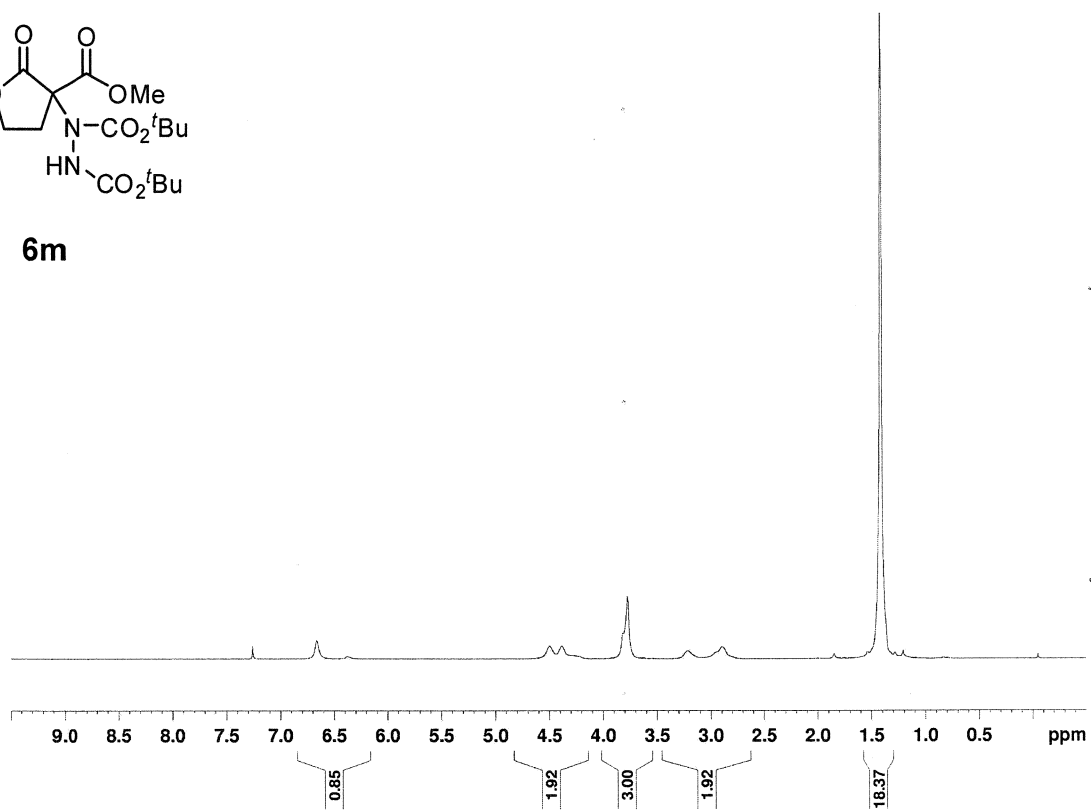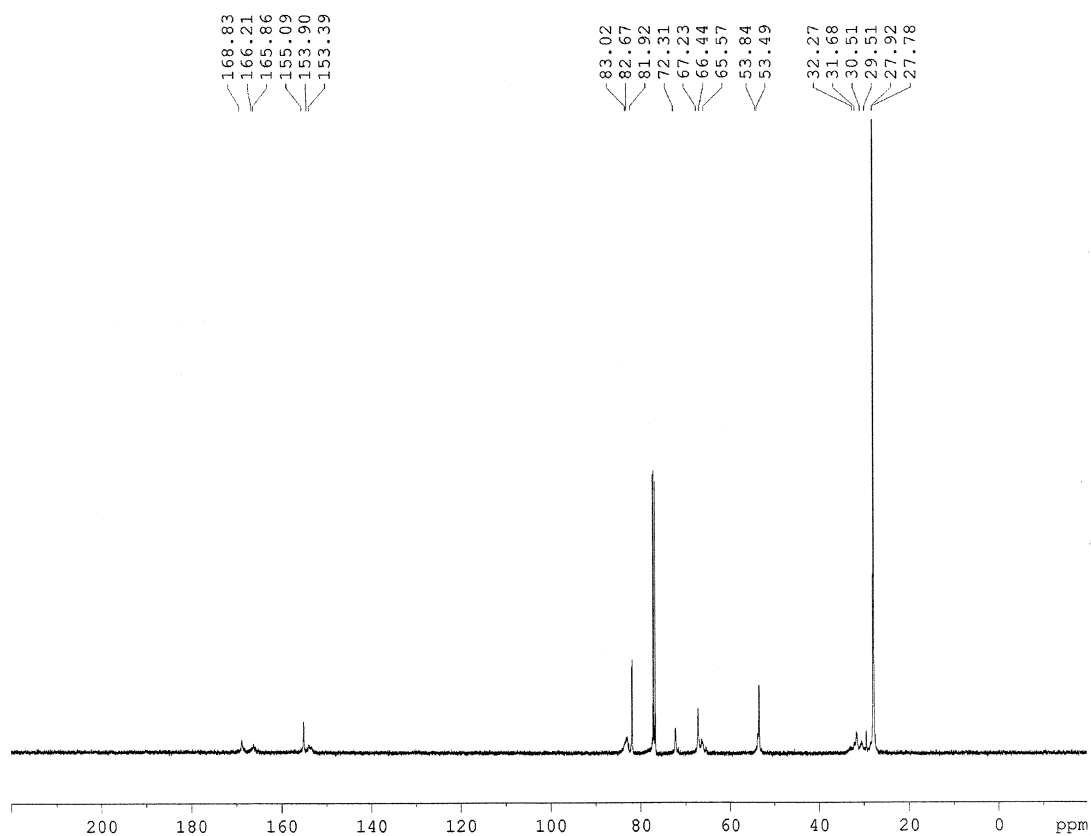

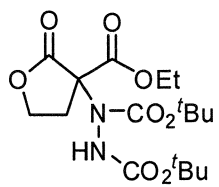

**6n**

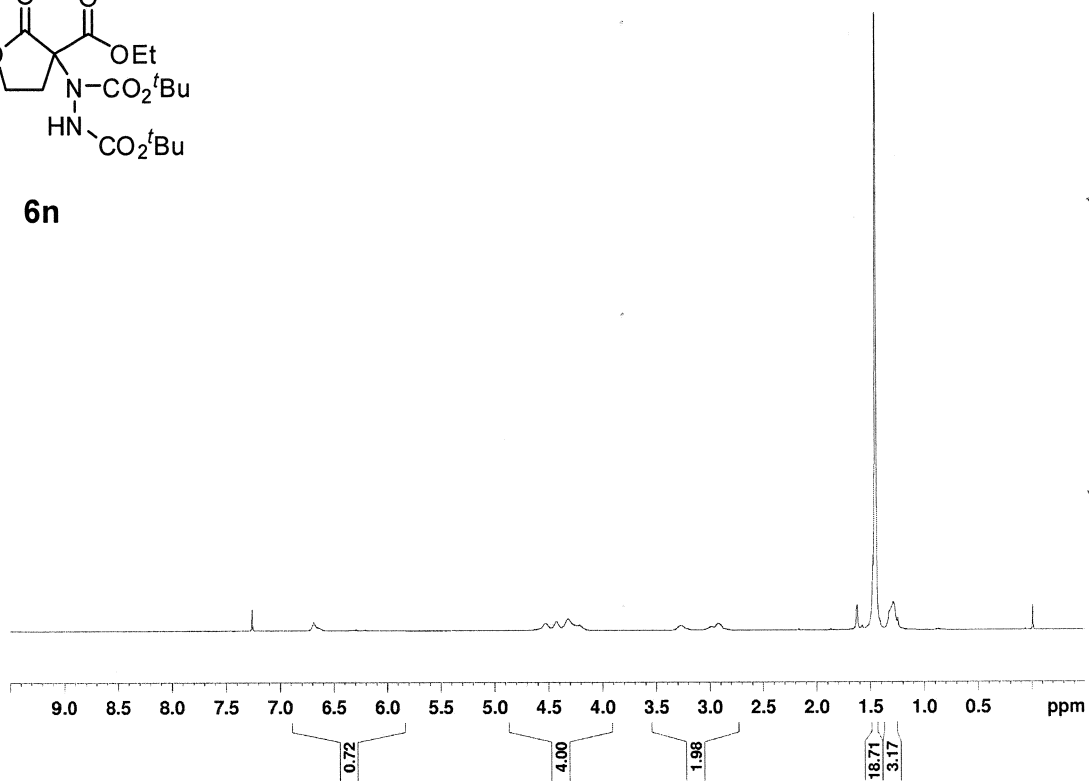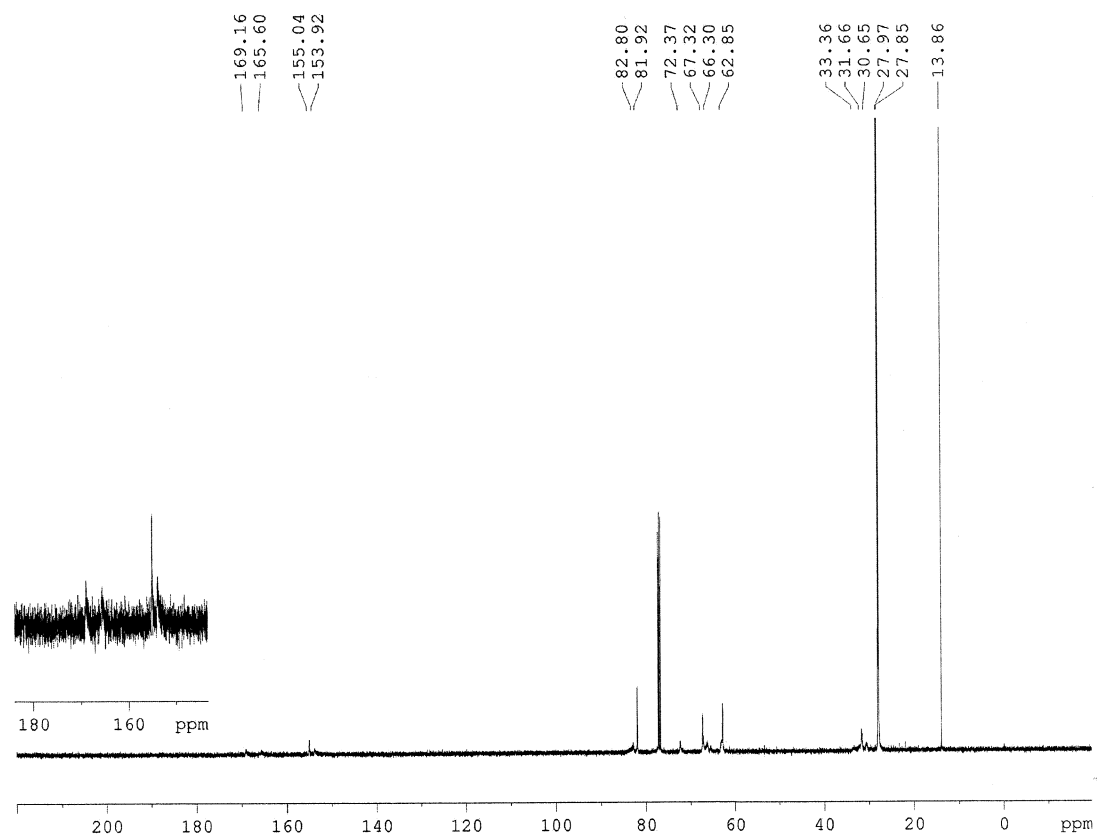

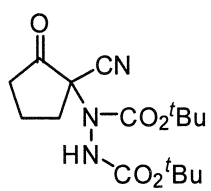

**60**

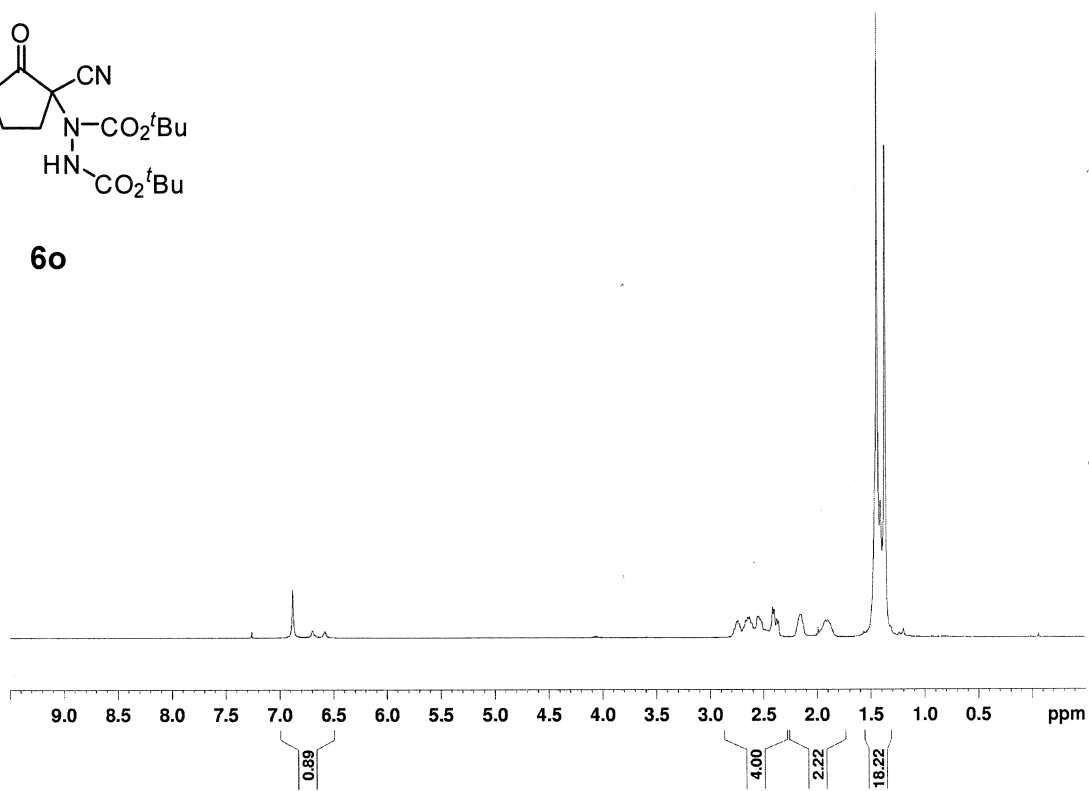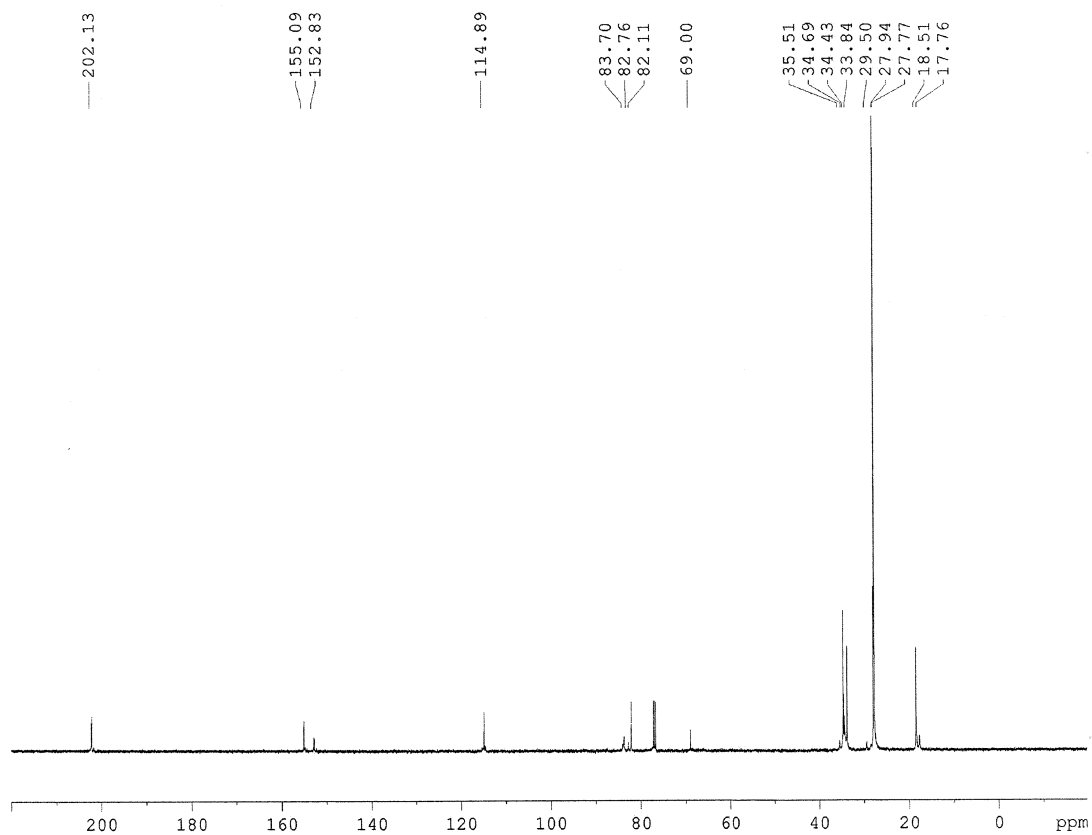

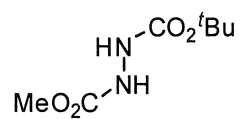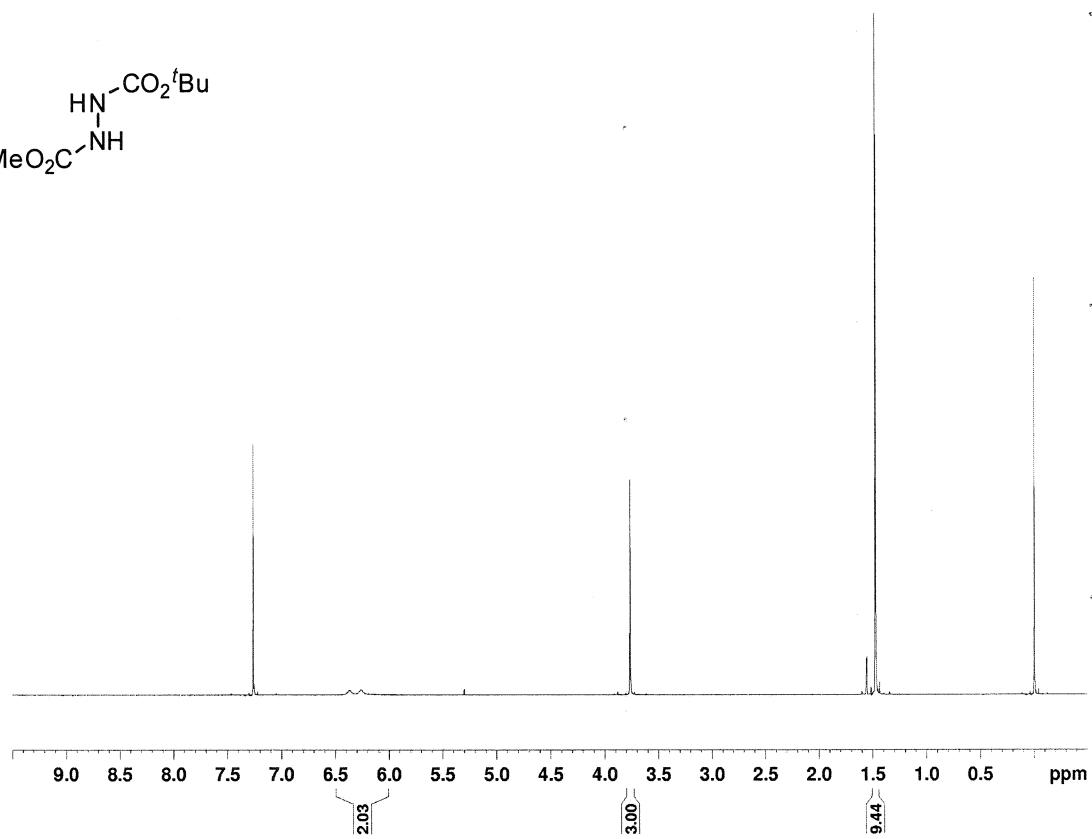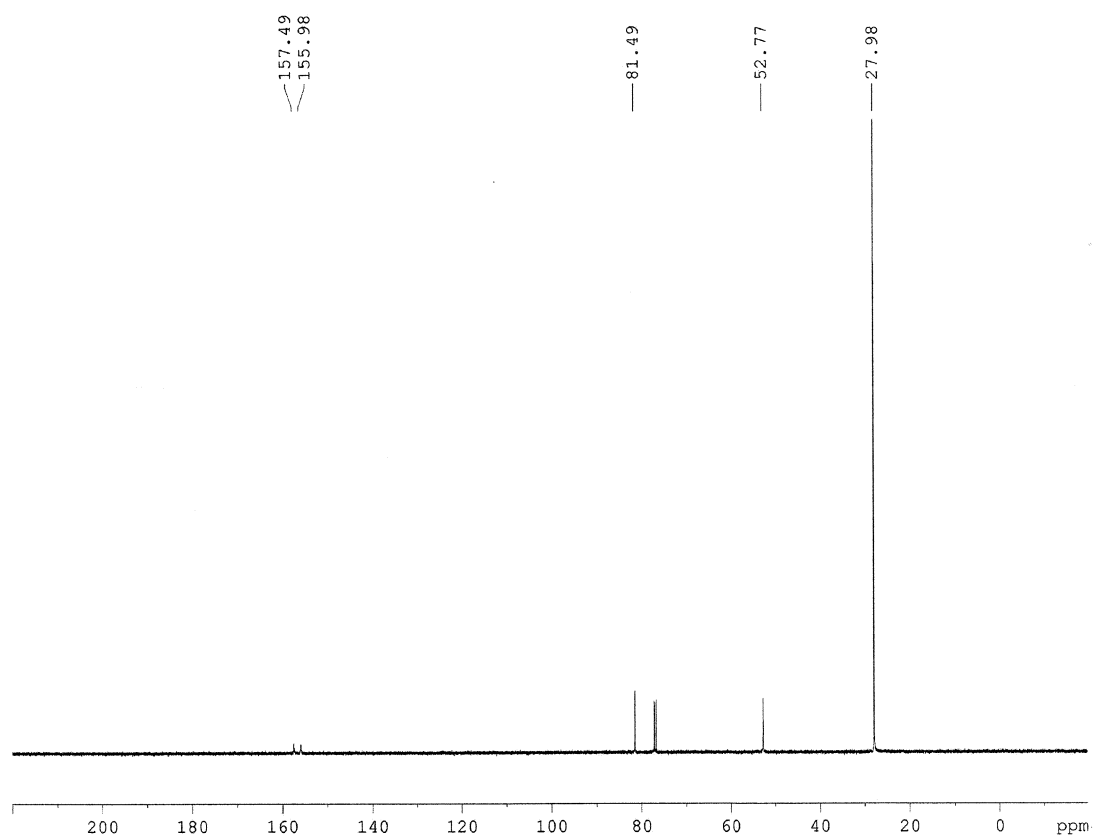

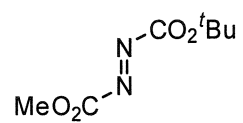

7

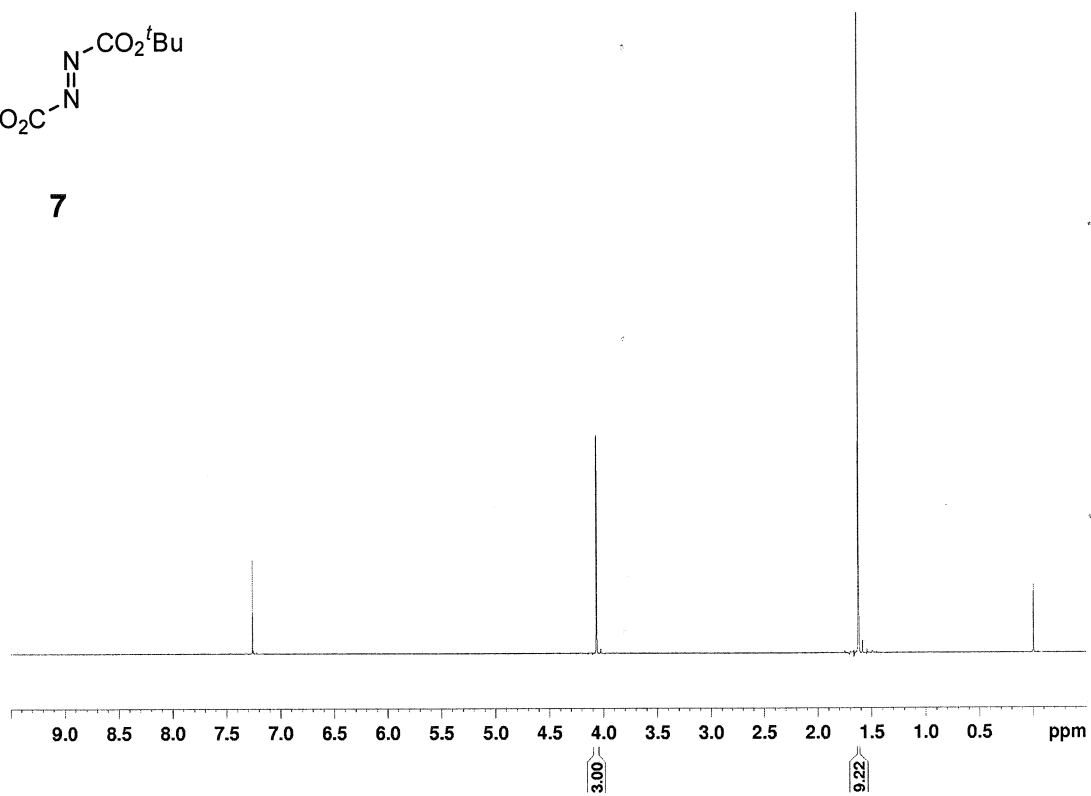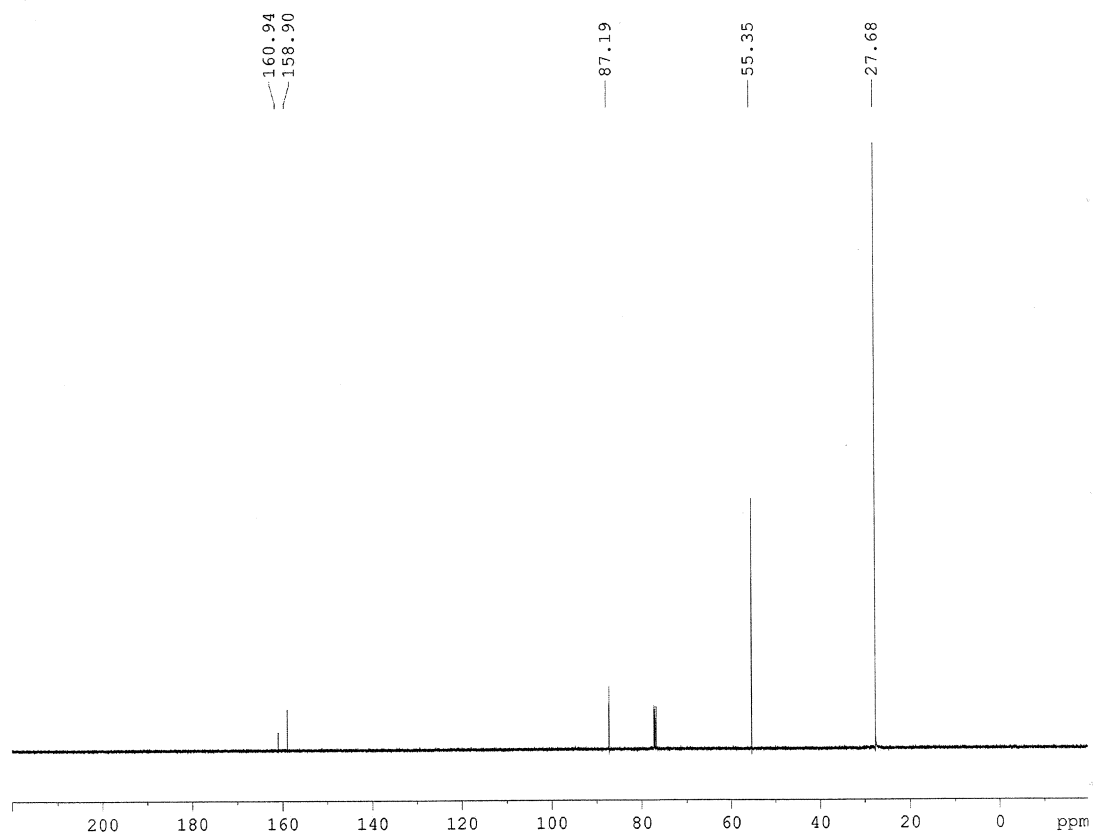

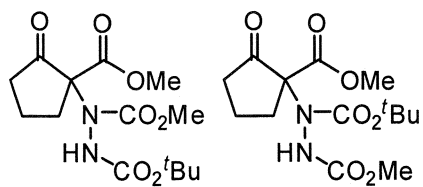

8

9

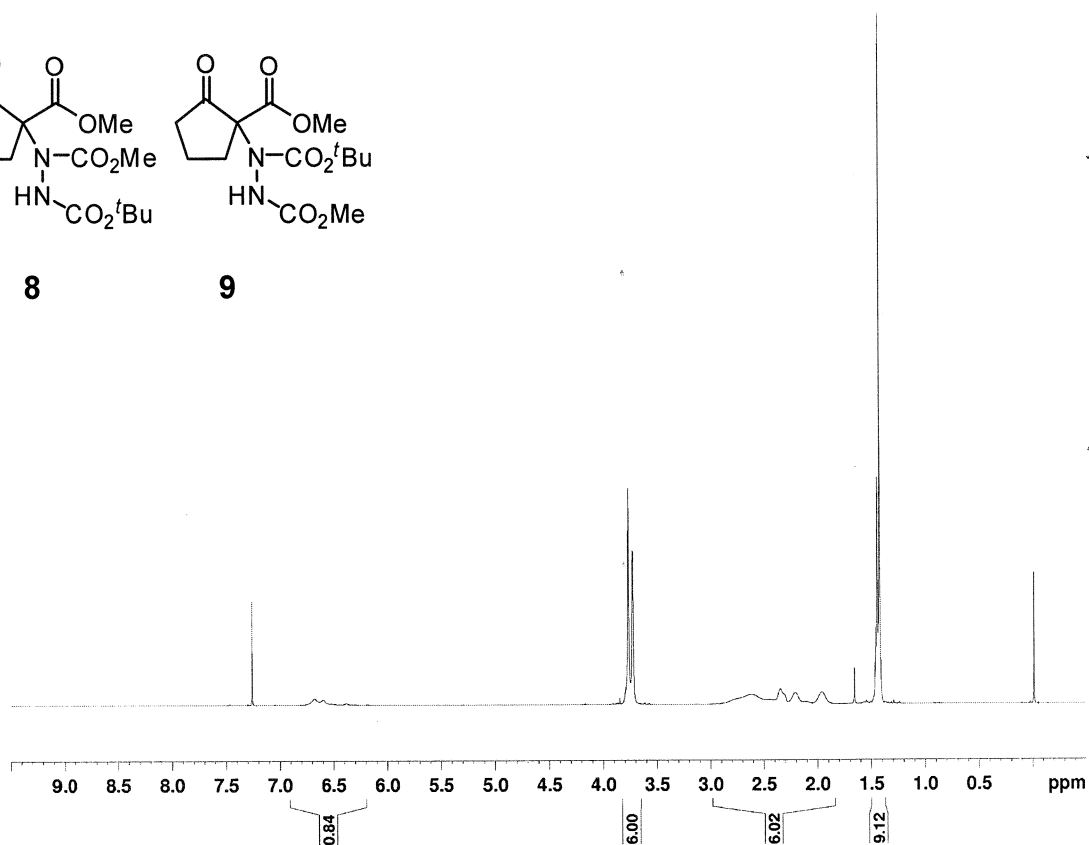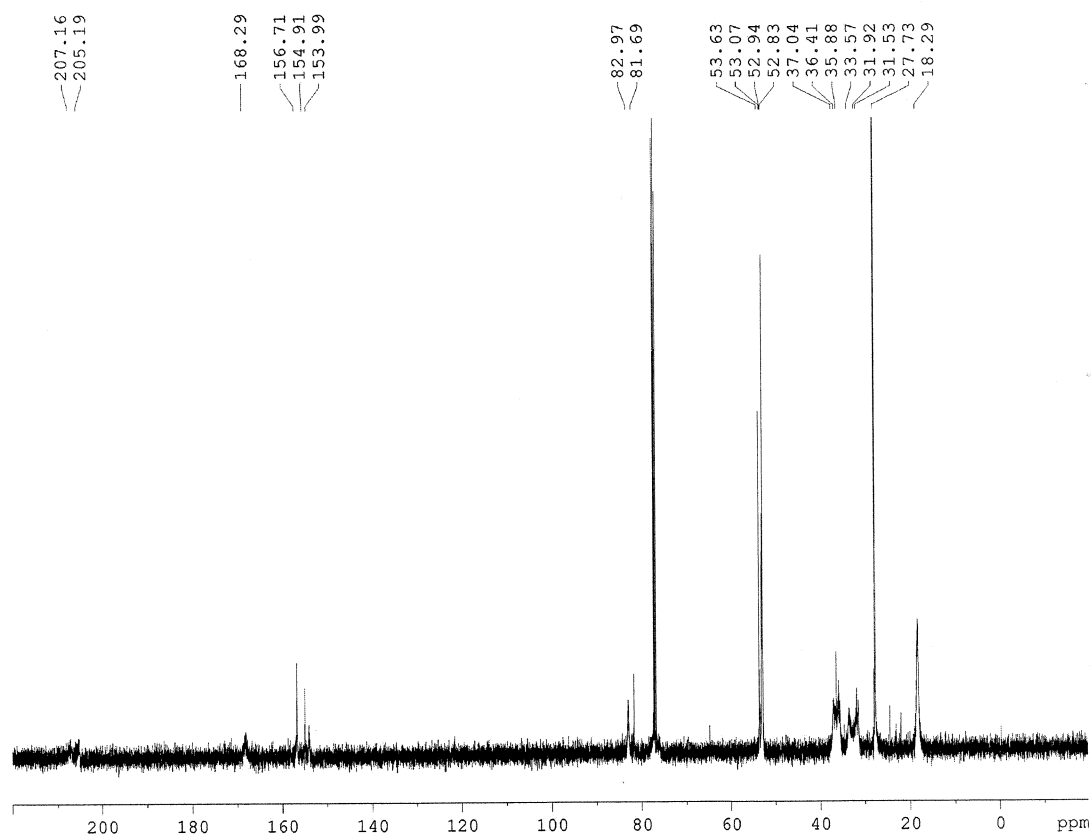

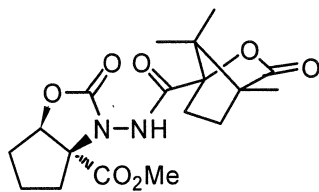

22

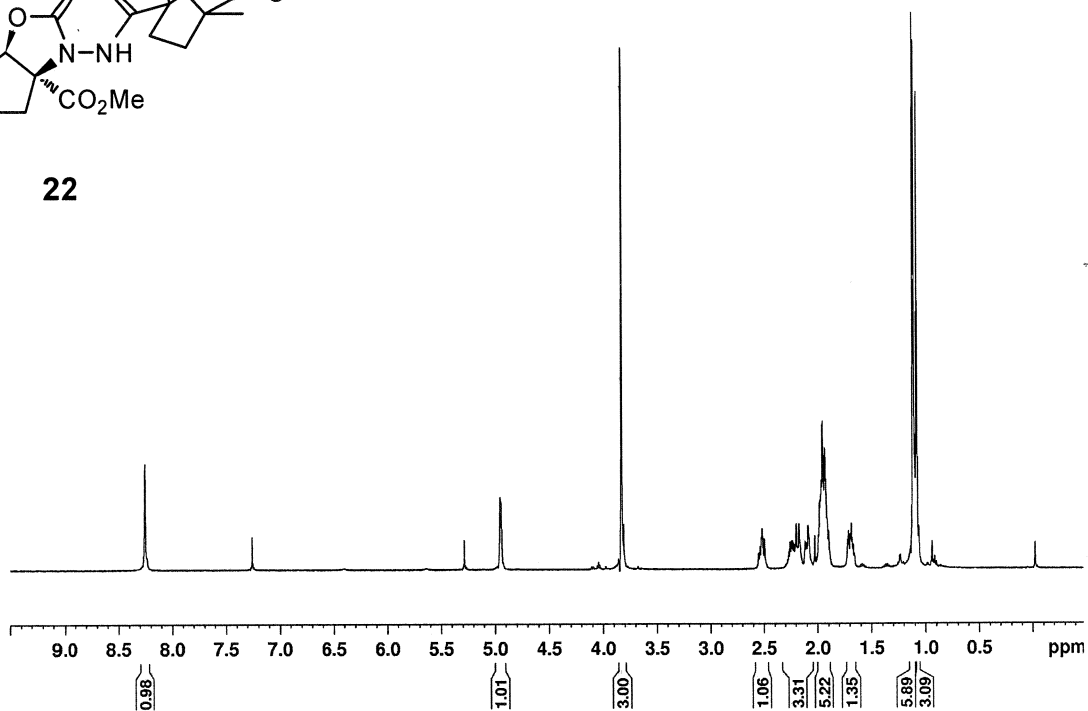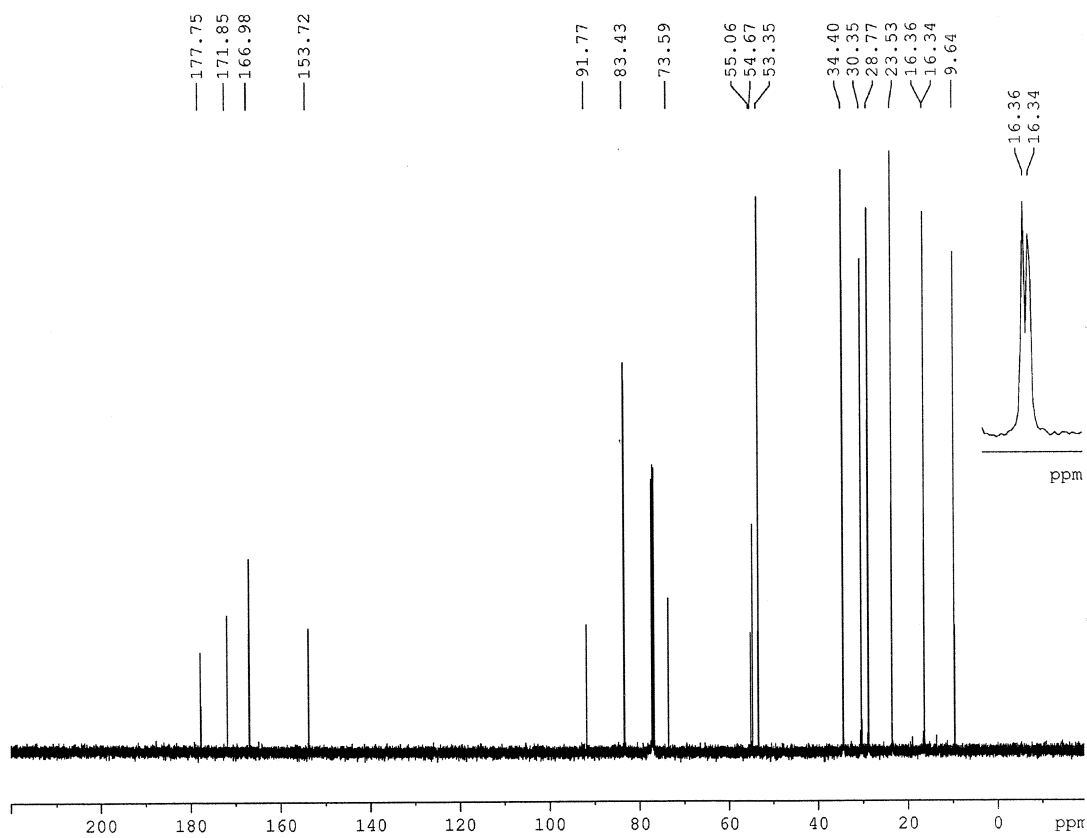

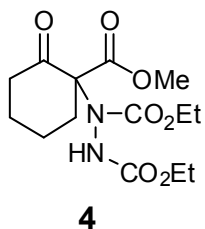

IA, hexanes/2-propanol = 95/5, flow rate 1.0 mL/min, 220 nm

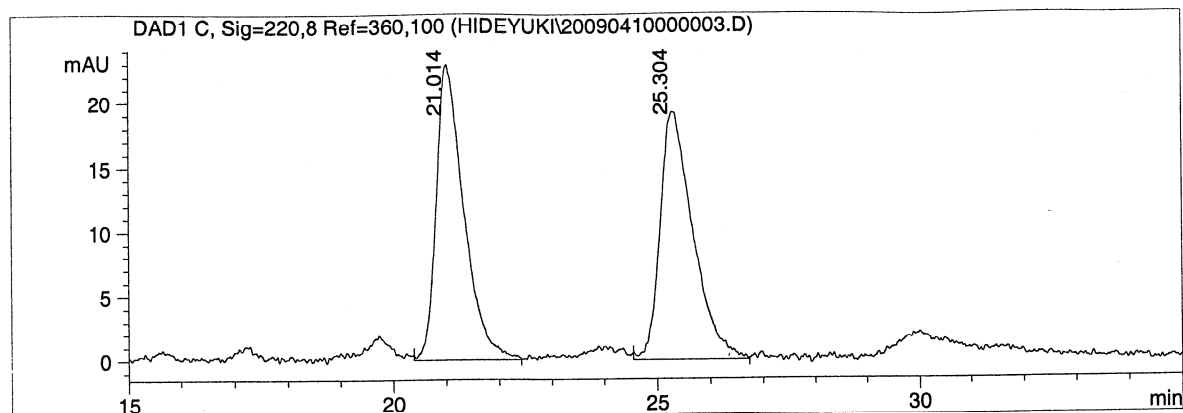

| # | RT (min) | Peak Area | Peak Area % |
|---|----------|-----------|-------------|
| 1 | 21.014   | 834.101   | 50.015      |
| 2 | 25.304   | 833.603   | 49.985      |

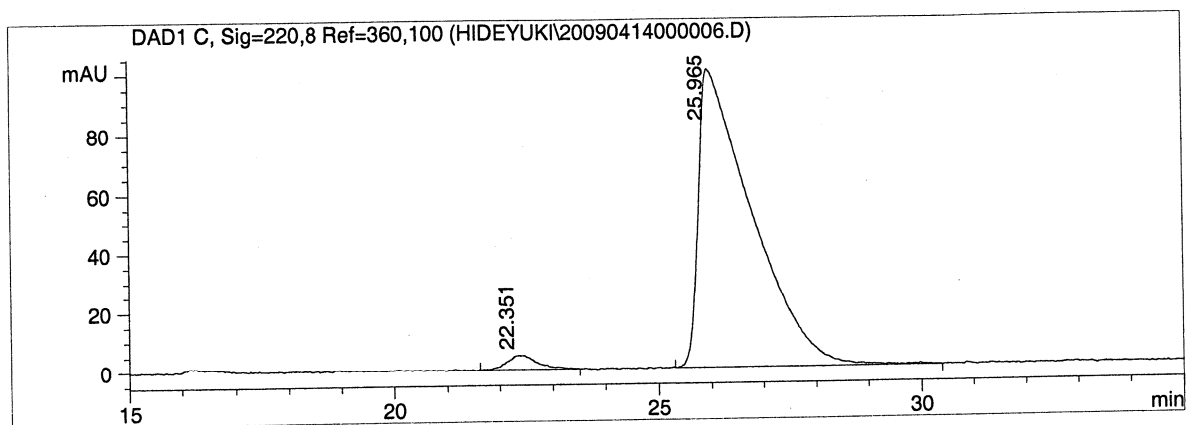

| # | RT (min) | Peak Area | Peak Area % |
|---|----------|-----------|-------------|
| 1 | 22.351   | 188.483   | 2.584       |
| 2 | 25.965   | 7104.512  | 97.416      |

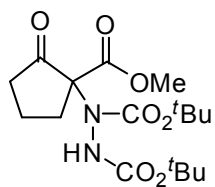

**6b**

IA, hexanes/ethanol = 95/5, flow rate 1.0 mL/min, 210 nm

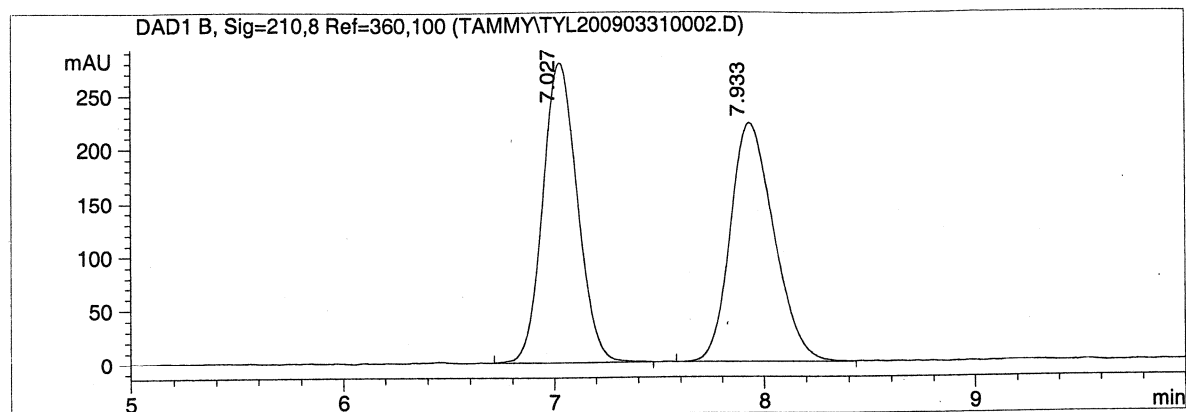

| # | RT (min) | Peak Area | Peak Area % |
|---|----------|-----------|-------------|
| 1 | 7.027    | 3216.136  | 49.980      |
| 2 | 7.933    | 3218.664  | 50.020      |

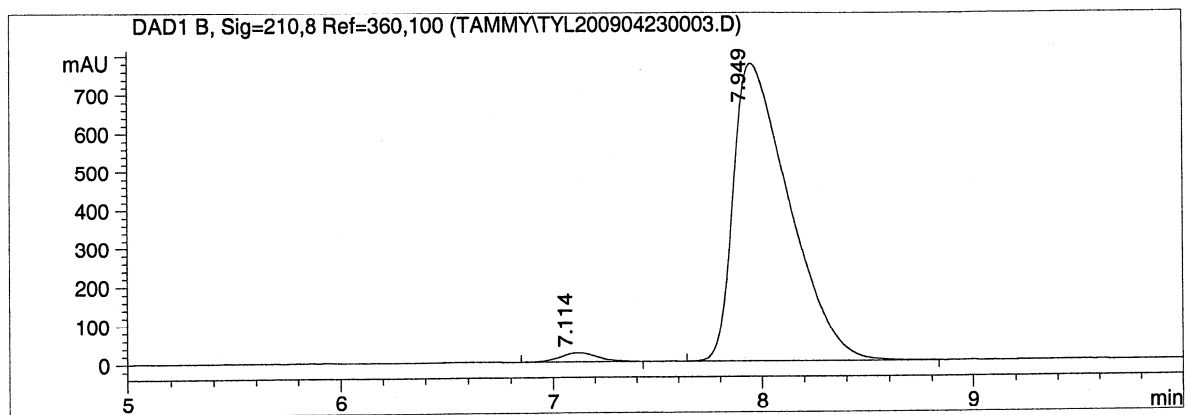

| # | RT (min) | Peak Area | Peak Area % |
|---|----------|-----------|-------------|
| 1 | 7.114    | 299.066   | 2.049       |
| 2 | 7.949    | 14297.740 | 97.951      |

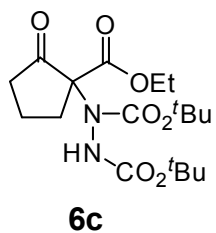

IA, hexanes/ethanol = 95/5, flow rate 1.0 mL/min, 210 nm

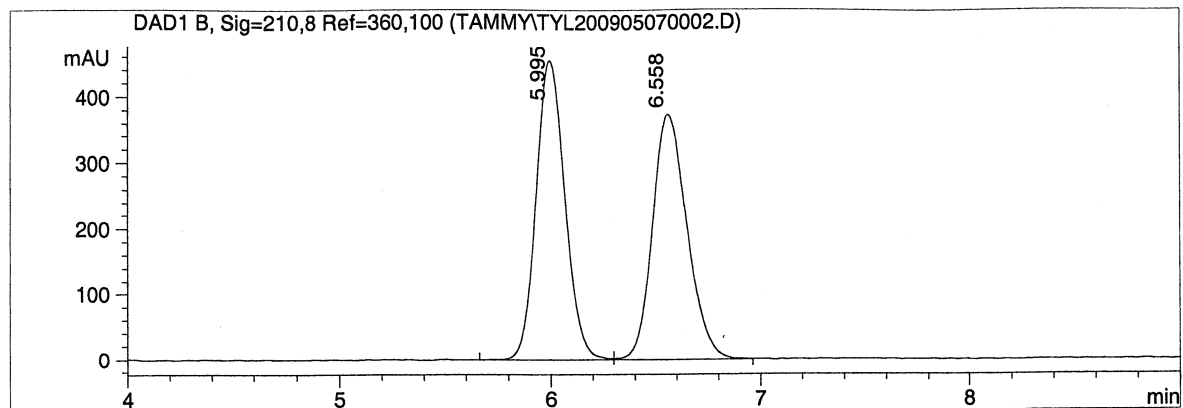

| # | RT (min) | Peak Area | Peak Area % |
|---|----------|-----------|-------------|
| 1 | 5.995    | 4284.202  | 49.831      |
| 2 | 6.558    | 4313.176  | 50.169      |

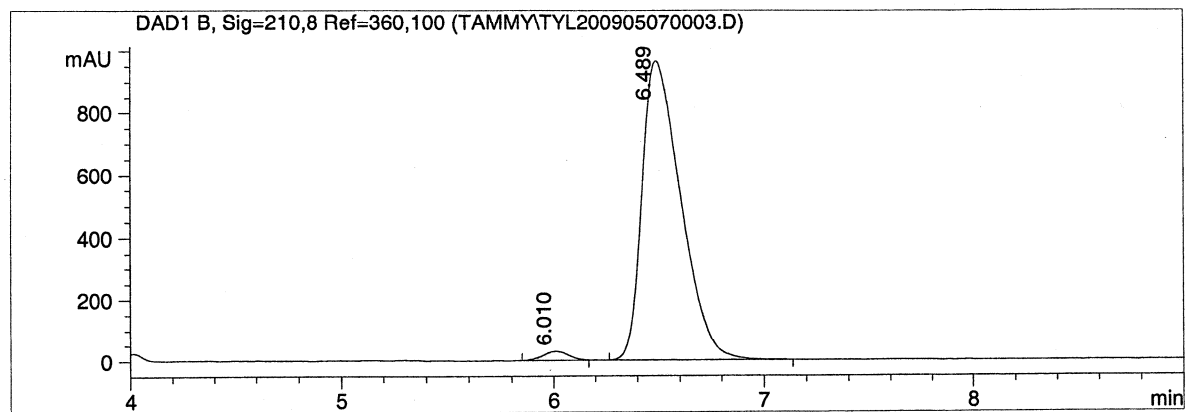

| # | RT (min) | Peak Area | Peak Area % |
|---|----------|-----------|-------------|
| 1 | 6.010    | 264.794   | 2.094       |
| 2 | 6.489    | 12381.440 | 97.906      |

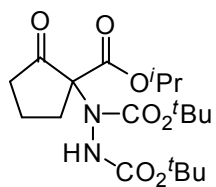

**6d**

IA, hexanes/2-propanol = 95/5, flow rate 1.0 mL/min, 210 nm

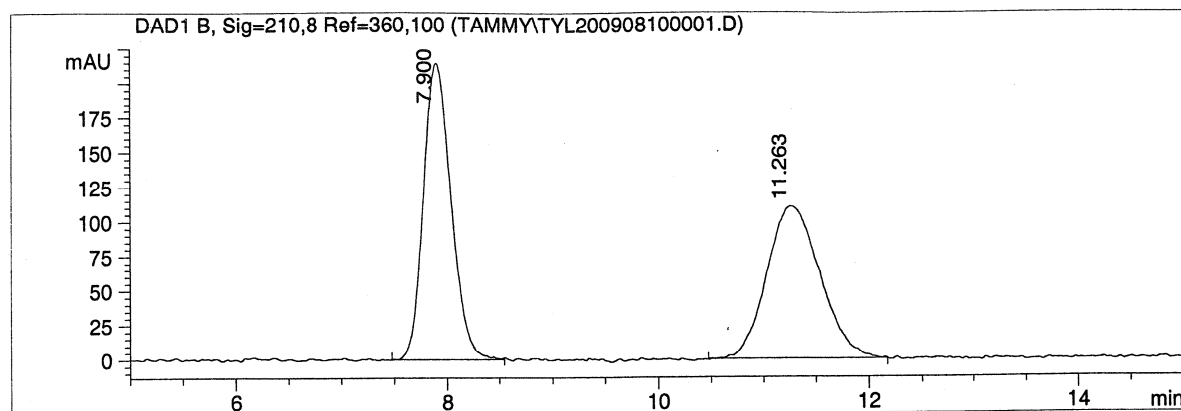

| # | RT (min) | Peak Area | Peak Area % |
|---|----------|-----------|-------------|
| 1 | 7.900    | 3911.406  | 50.101      |
| 2 | 11.263   | 3895.644  | 49.899      |

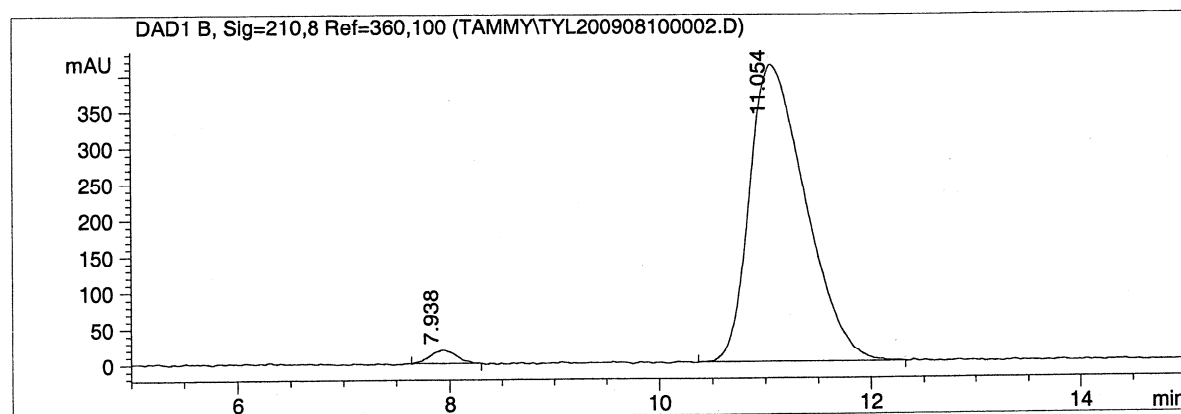

| # | RT (min) | Peak Area | Peak Area % |
|---|----------|-----------|-------------|
| 1 | 7.938    | 329.818   | 2.119       |
| 2 | 11.054   | 15233.700 | 97.881      |

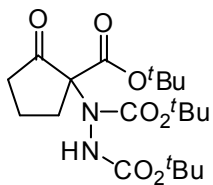

**6e**

IA, hexanes/2-propanol = 98/2, flow rate 1.0 mL/min, 210 nm

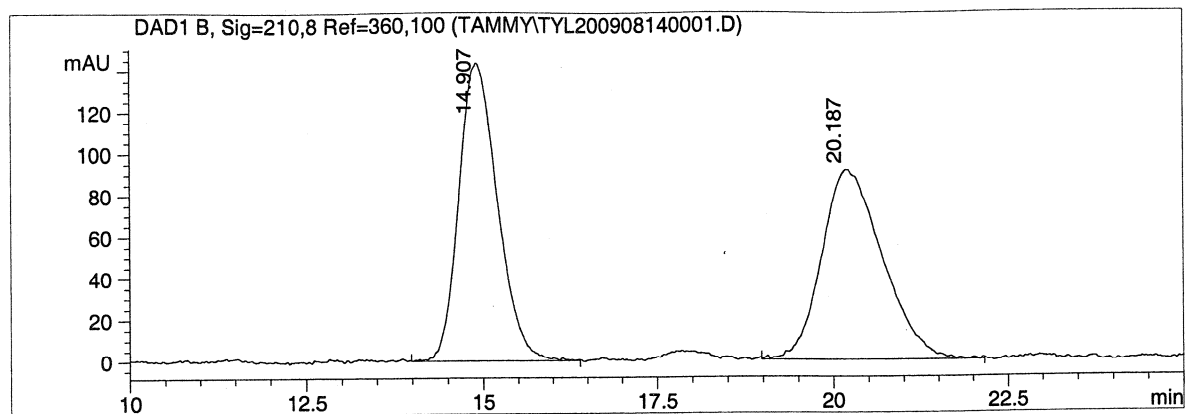

| # | RT (min) | Peak Area | Peak Area % |
|---|----------|-----------|-------------|
| 1 | 14.907   | 5497.500  | 49.743      |
| 2 | 20.187   | 5554.371  | 50.257      |

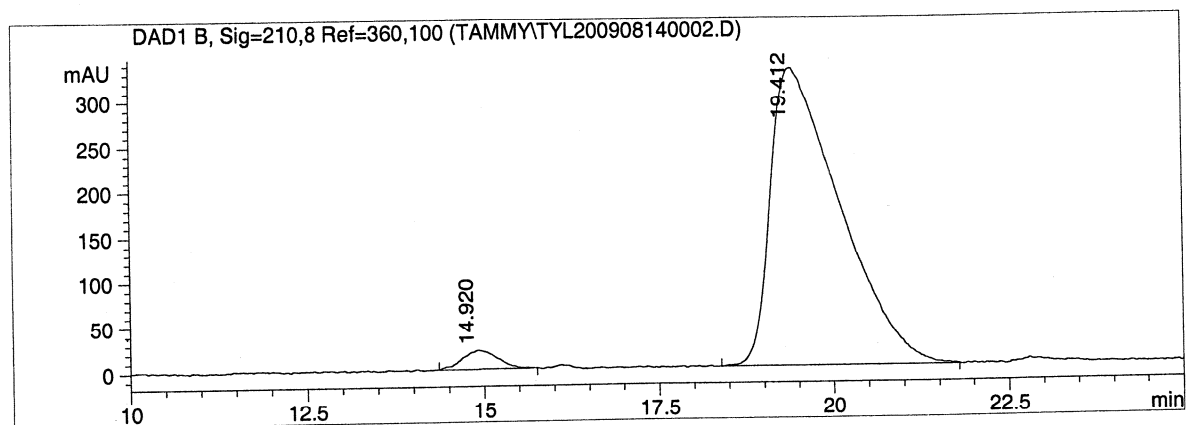

| # | RT (min) | Peak Area | Peak Area % |
|---|----------|-----------|-------------|
| 1 | 14.920   | 718.585   | 3.044       |
| 2 | 19.412   | 22891.068 | 96.956      |

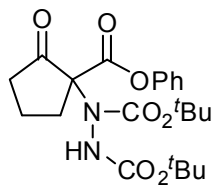

**6f**

IA, hexanes/2-propanol = 97/3, flow rate 1.0 mL/min, 210 nm

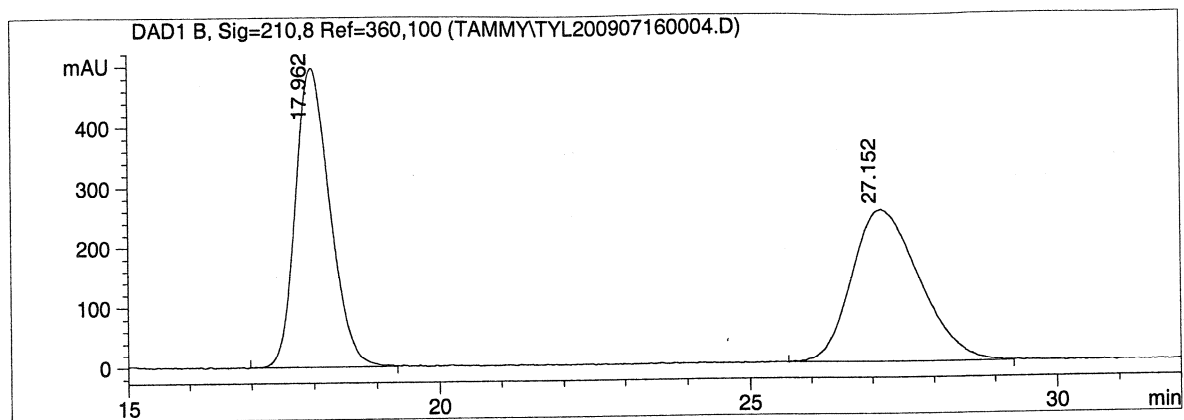

| # | RT (min) | Peak Area | Peak Area % |
|---|----------|-----------|-------------|
| 1 | 17.962   | 19084.936 | 49.556      |
| 2 | 27.152   | 19426.564 | 50.444      |

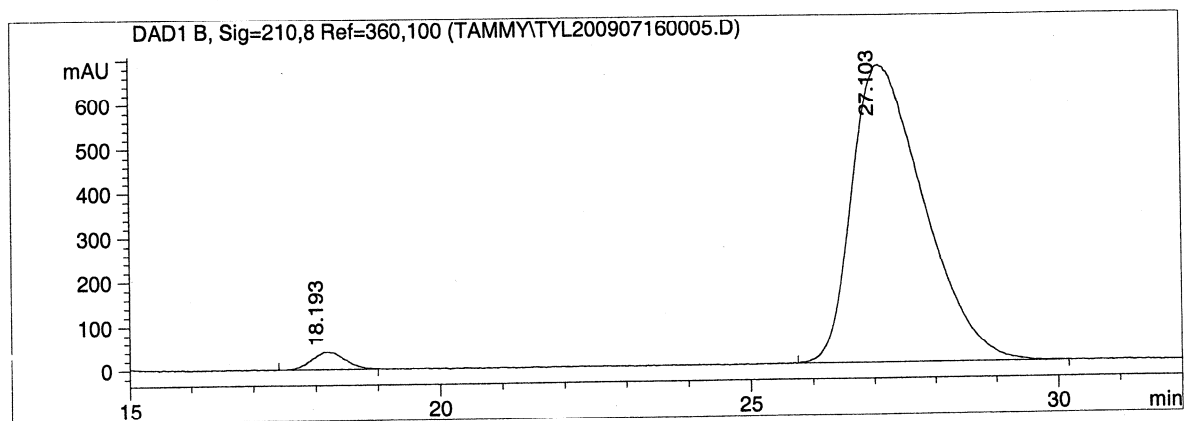

| # | RT (min) | Peak Area | Peak Area % |
|---|----------|-----------|-------------|
| 1 | 18.193   | 1461.093  | 2.571       |
| 2 | 27.103   | 55360.926 | 97.429      |

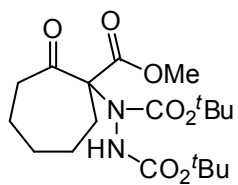

**6g**

OD-H, hexanes/2-propanol = 97/3, flow rate 1.0 mL/min, 210 nm

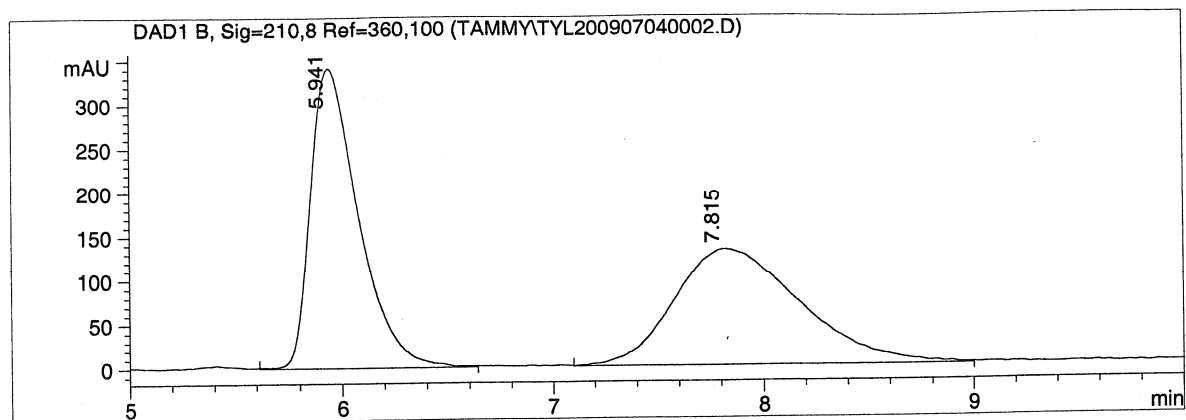

| # | RT (min) | Peak Area | Peak Area % |
|---|----------|-----------|-------------|
| 1 | 5.941    | 5414.586  | 49.612      |
| 2 | 7.815    | 5499.339  | 50.388      |

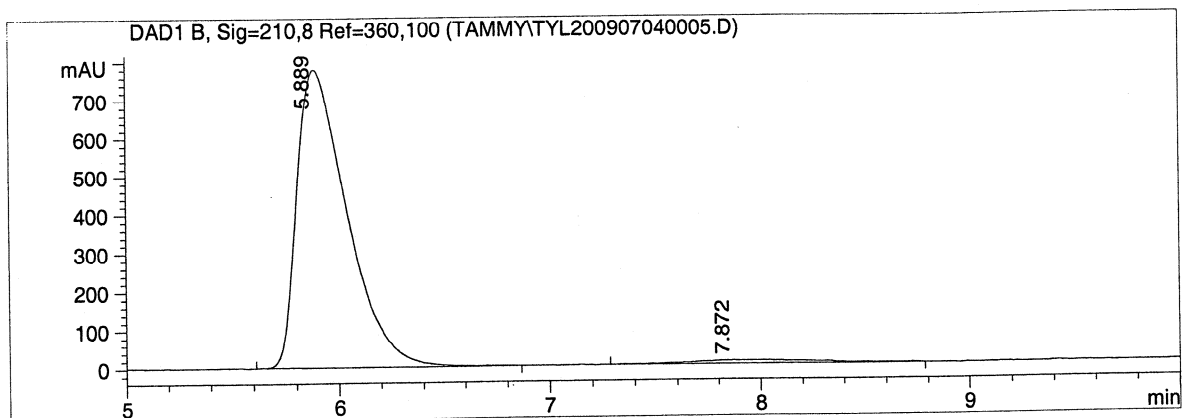

| # | RT (min) | Peak Area | Peak Area % |
|---|----------|-----------|-------------|
| 1 | 5.889    | 12835.195 | 97.206      |
| 2 | 7.872    | 368.864   | 2.794       |

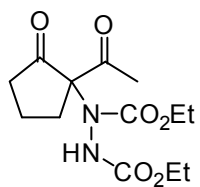

**6h**

OD-H, hexanes/ethanol = 95/5, flow rate 1.0 mL/min, 210 nm

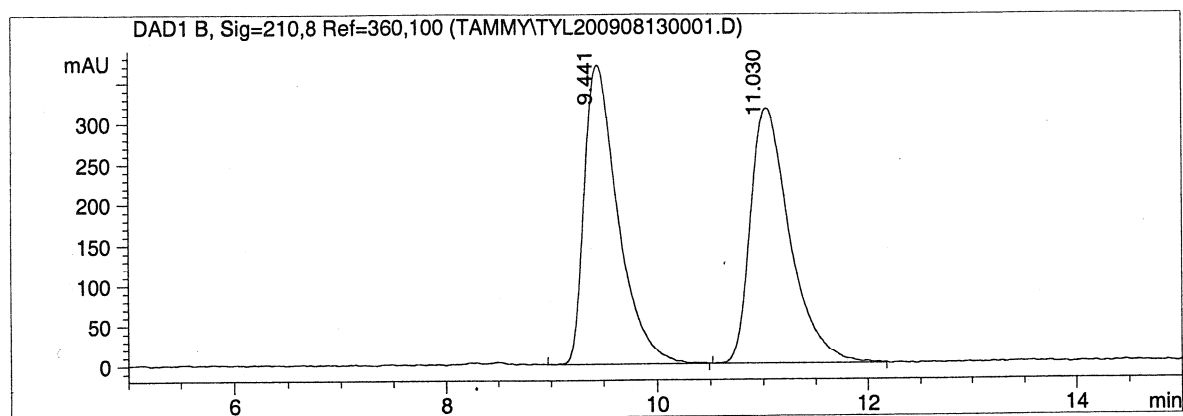

| # | RT (min) | Peak Area | Peak Area % |
|---|----------|-----------|-------------|
| 1 | 9.441    | 8217.245  | 49.814      |
| 2 | 11.030   | 8278.474  | 50.186      |

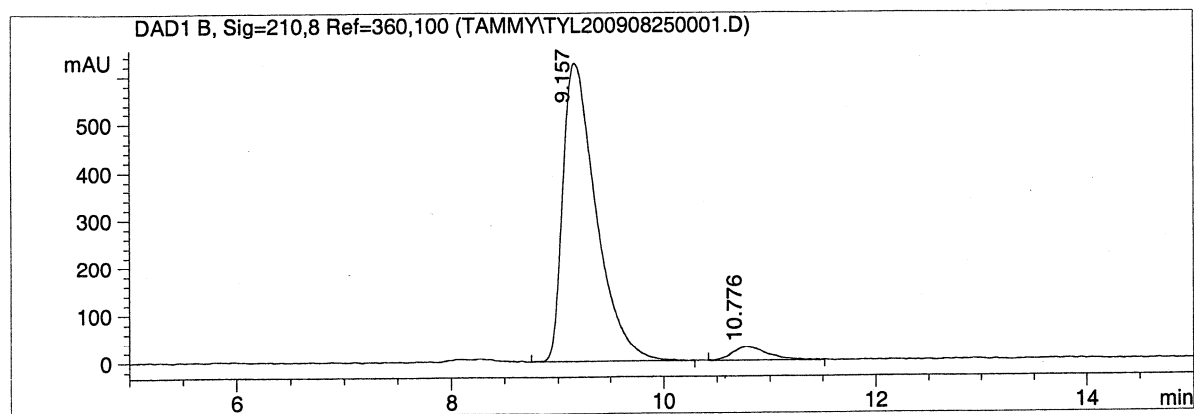

| # | RT (min) | Peak Area | Peak Area % |
|---|----------|-----------|-------------|
| 1 | 9.157    | 13863.753 | 95.510      |
| 2 | 10.776   | 651.711   | 4.490       |

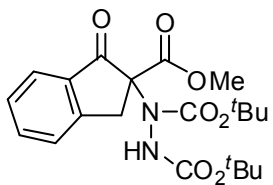

6i

IA, hexanes/2-propanol = 90/10, flow rate 1.0 mL/min, 220 nm

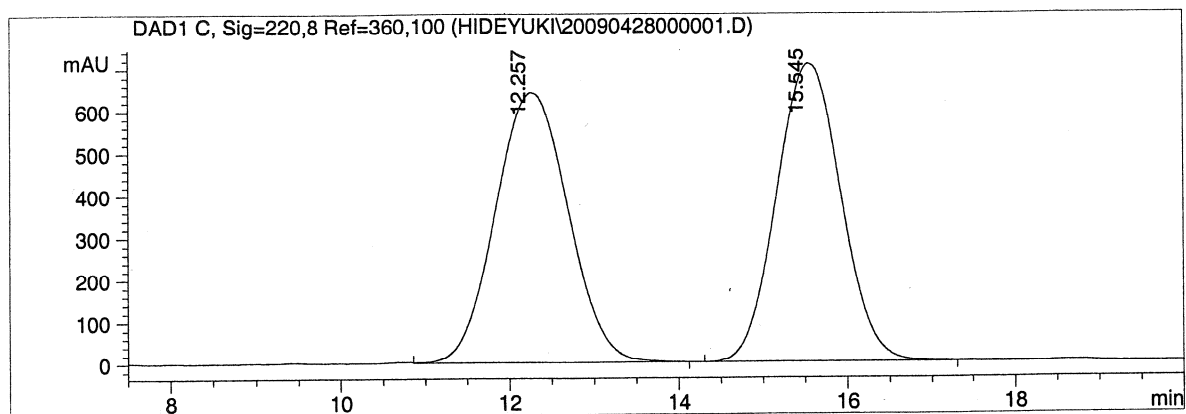

| # | RT (min) | Peak Area | Peak Area % |
|---|----------|-----------|-------------|
| 1 | 12.257   | 38427.844 | 50.415      |
| 2 | 15.545   | 37795.027 | 49.585      |

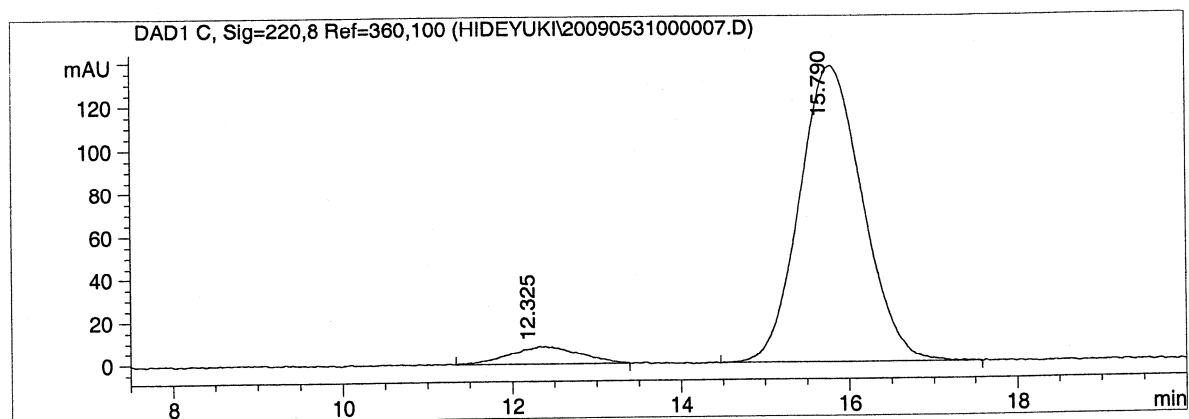

| # | RT (min) | Peak Area | Peak Area % |
|---|----------|-----------|-------------|
| 1 | 12.325   | 473.780   | 6.145       |
| 2 | 15.790   | 7236.606  | 93.855      |

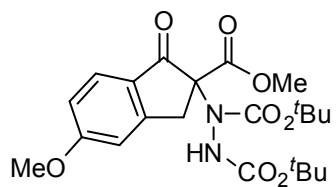

6j

IA, hexanes/2-propanol = 90/10, flow rate 0.5 mL/min, 220 nm

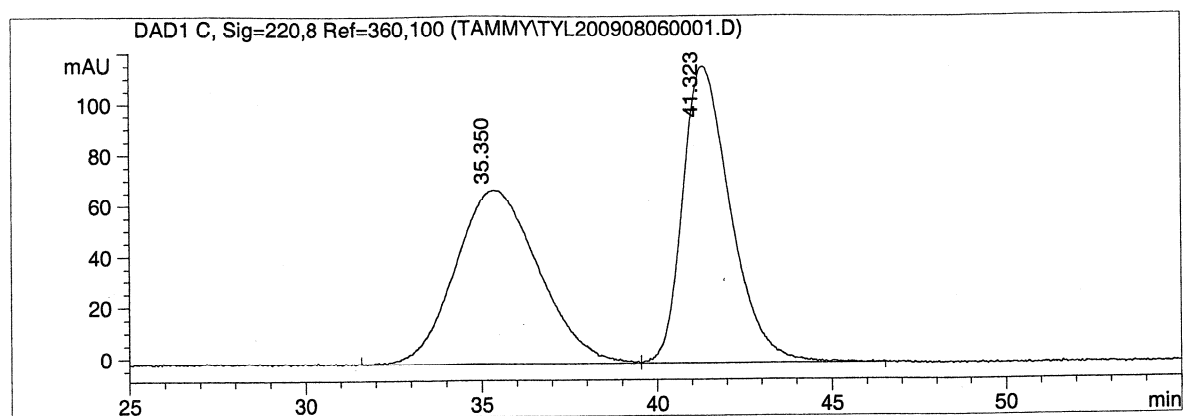

| # | RT (min) | Peak Area | Peak Area % |
|---|----------|-----------|-------------|
| 1 | 35.350   | 11187.977 | 50.048      |
| 2 | 41.323   | 11166.677 | 49.952      |

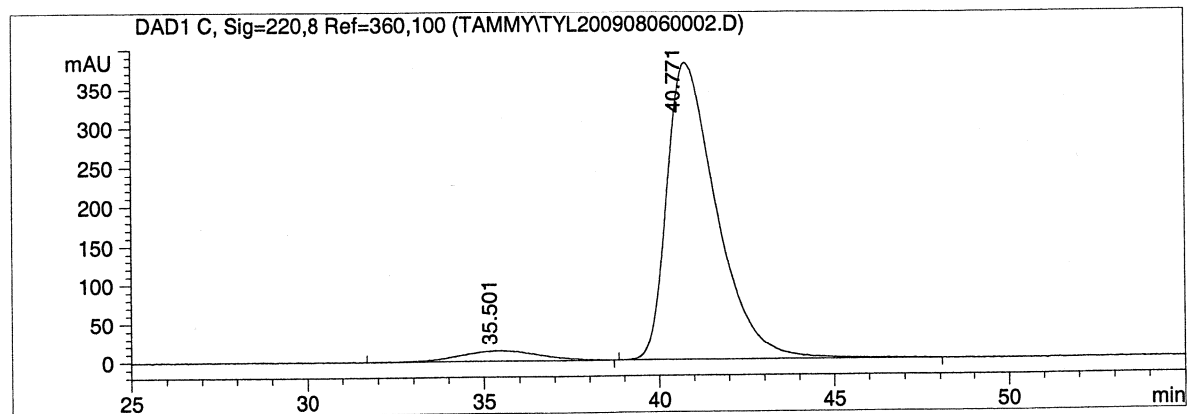

| # | RT (min) | Peak Area | Peak Area % |
|---|----------|-----------|-------------|
| 1 | 35.501   | 2024.990  | 5.090       |
| 2 | 40.771   | 37755.855 | 94.910      |

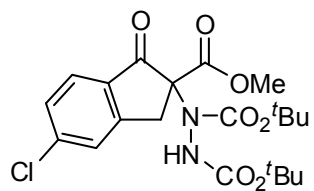

**6k**

IA, hexanes/2-propanol = 97/3, flow rate 0.8 mL/min, 220 nm

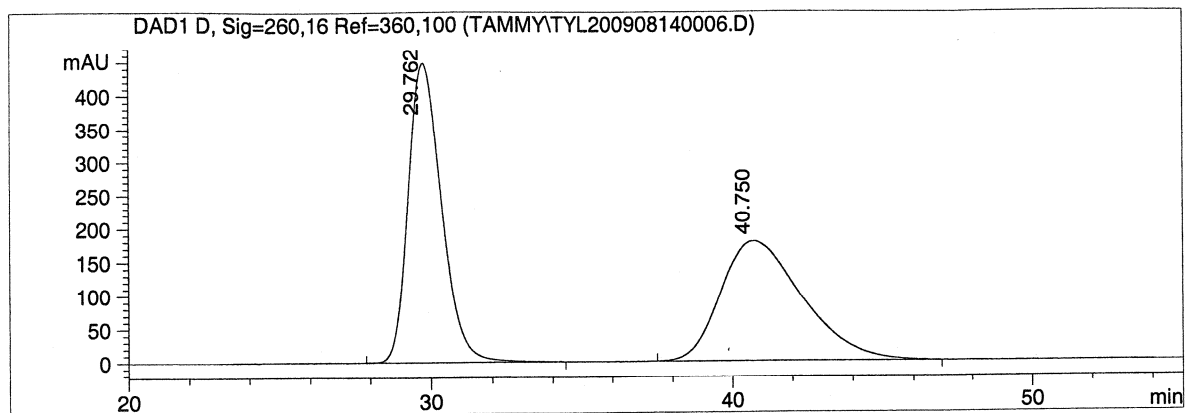

| # | RT (min) | Peak Area | Peak Area % |
|---|----------|-----------|-------------|
| 1 | 29.762   | 33991.820 | 49.918      |
| 2 | 40.750   | 34103.551 | 50.082      |

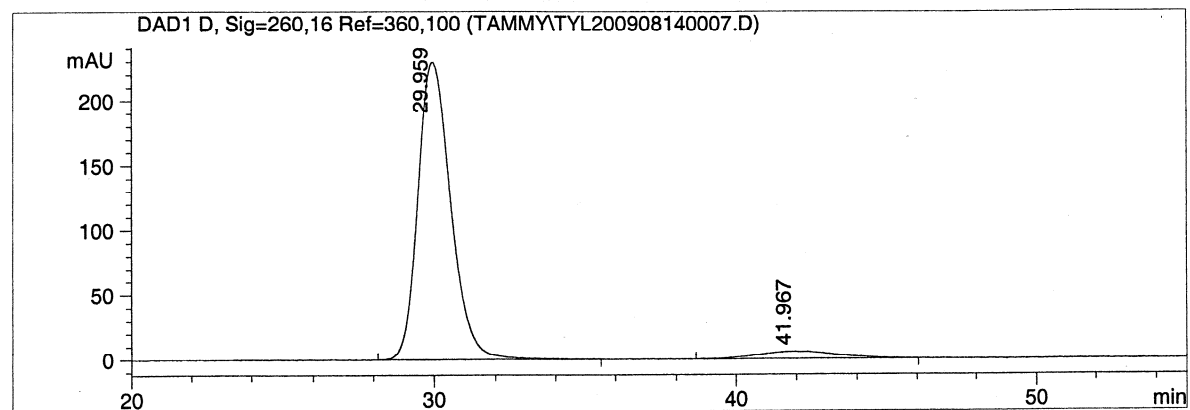

| # | RT (min) | Peak Area | Peak Area % |
|---|----------|-----------|-------------|
| 1 | 29.959   | 17347.281 | 93.993      |
| 2 | 41.967   | 1108.562  | 6.007       |

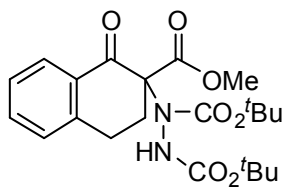

6I

IA, hexanes/2-propanol = 80/20, flow rate 1.0 mL/min, 220 nm

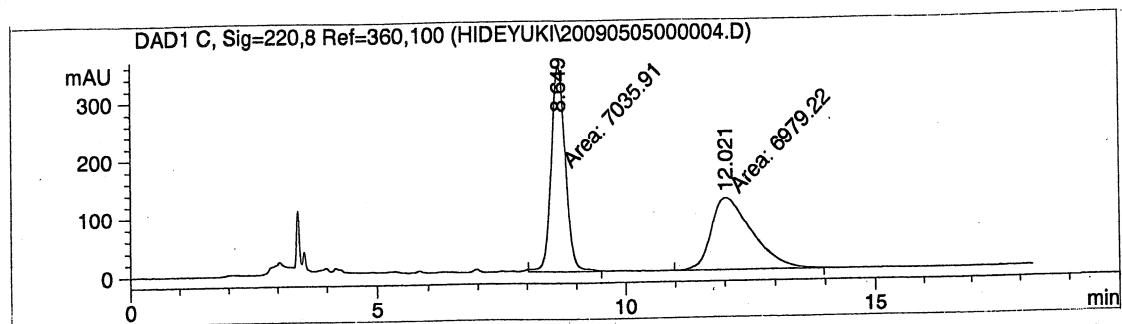

| Peak # | RetTime [min] | Type | Width [min] | Area [mAU*s] | Height [mAU] | Area %  |
|--------|---------------|------|-------------|--------------|--------------|---------|
| 1      | 8.649         | MM   | 0.3331      | 7035.91455   | 351.99857    | 50.2023 |
| 2      | 12.021        | MM   | 0.9407      | 6979.21875   | 123.65813    | 49.7977 |

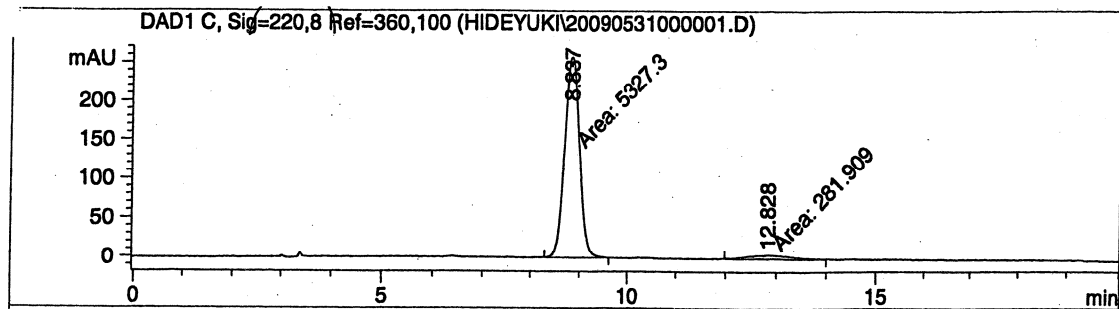

| Peak # | RetTime [min] | Type | Width [min] | Area [mAU*s] | Height [mAU] | Area %  |
|--------|---------------|------|-------------|--------------|--------------|---------|
| 1      | 8.837         | MM   | 0.3446      | 5327.29688   | 257.66333    | 94.9742 |
| 2      | 12.828        | MM   | 0.9123      | 281.90860    | 5.15015      | 5.0258  |

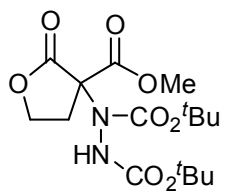

**6m**

OD-H, hexanes/2-propanol = 97/3, flow rate 0.5 mL/min, 220 nm

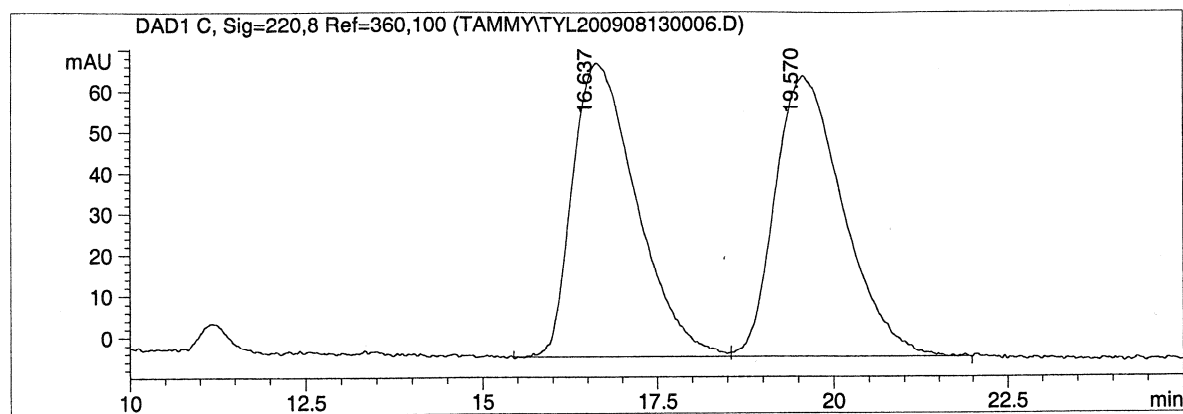

| # | RT (min) | Peak Area | Peak Area % |
|---|----------|-----------|-------------|
| 1 | 16.637   | 4593.434  | 50.073      |
| 2 | 19.570   | 4580.126  | 49.927      |

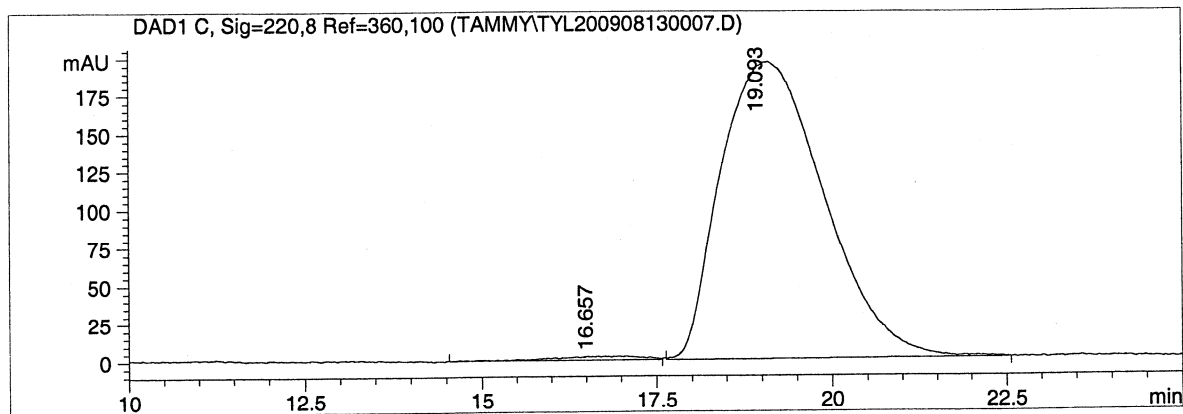

| # | RT (min) | Peak Area | Peak Area % |
|---|----------|-----------|-------------|
| 1 | 16.657   | 220.668   | 1.091       |
| 2 | 19.093   | 20012.615 | 98.909      |

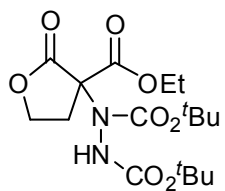

**6n**

IA, hexanes/2-propanol = 97/3, flow rate 1.0 mL/min, 220 nm

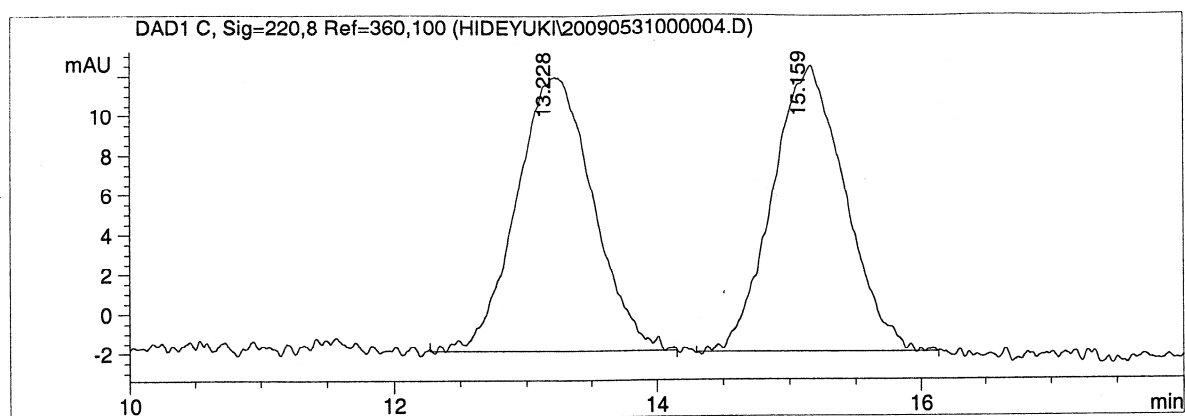

| # | RT (min) | Peak Area | Peak Area % |
|---|----------|-----------|-------------|
| 1 | 13.228   | 568.257   | 50.665      |
| 2 | 15.159   | 553.341   | 49.335      |

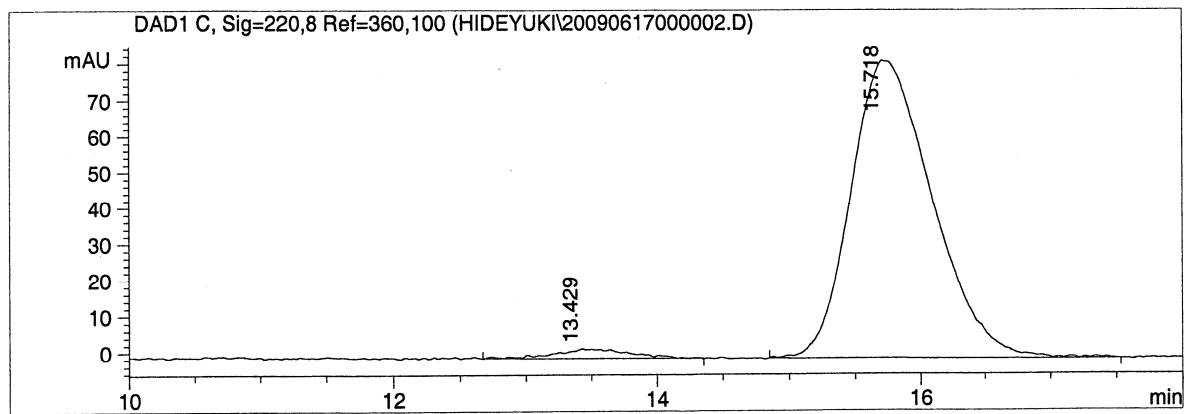

| # | RT (min) | Peak Area | Peak Area % |
|---|----------|-----------|-------------|
| 1 | 13.429   | 99.612    | 2.724       |
| 2 | 15.718   | 3557.051  | 97.276      |

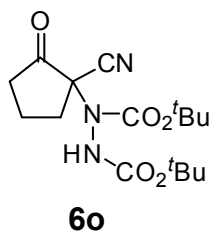

IA, hexanes/2-propanol = 90/10, flow rate 1.0 mL/min, 220 nm

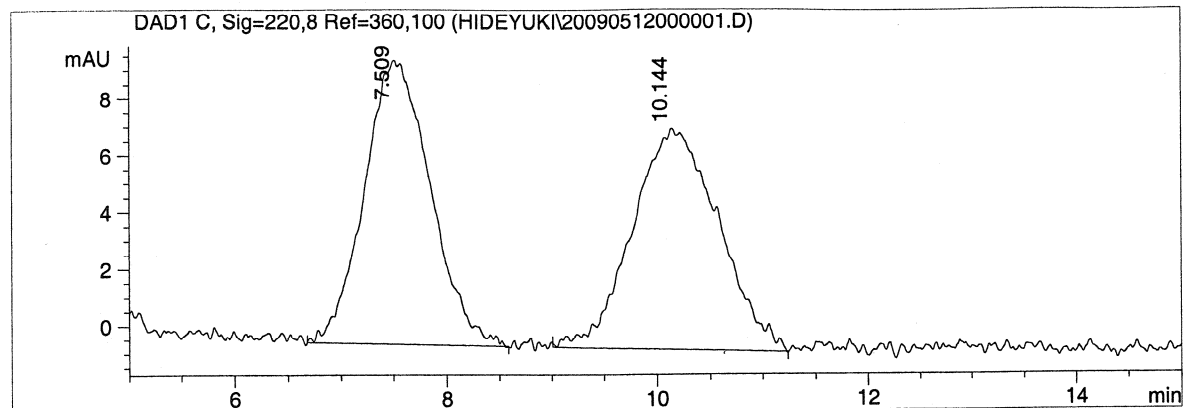

| # | RT (min) | Peak Area | Peak Area % |
|---|----------|-----------|-------------|
| 1 | 7.509    | 434.034   | 49.734      |
| 2 | 10.144   | 438.680   | 50.266      |

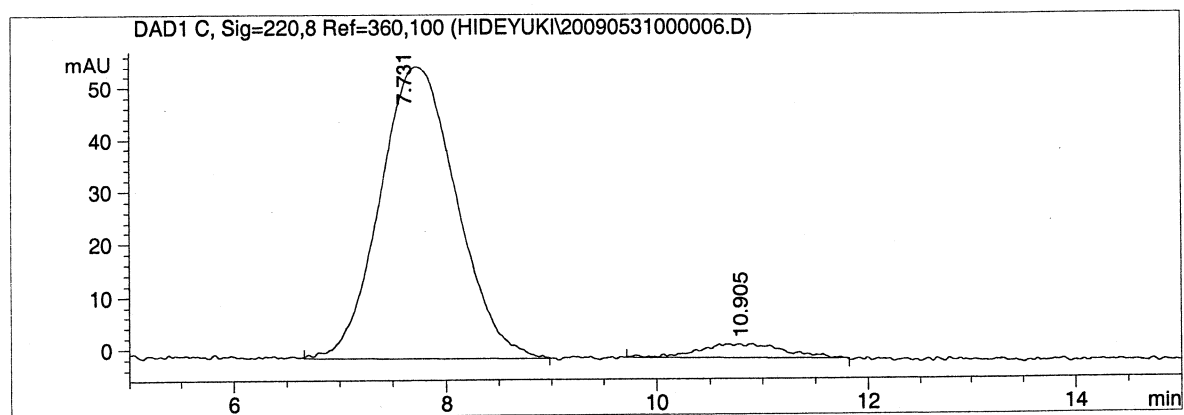

| # | RT (min) | Peak Area | Peak Area % |
|---|----------|-----------|-------------|
| 1 | 7.731    | 2781.927  | 95.124      |
| 2 | 10.905   | 142.608   | 4.876       |

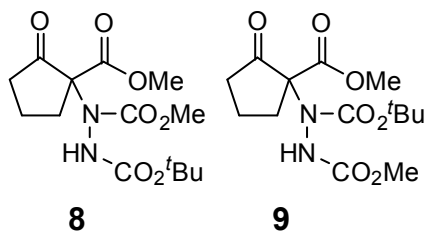

IA, hexanes/2-propanol = 90/10, flow rate 1.0 mL/min, 210 nm

#### Regioisomeric Ratio

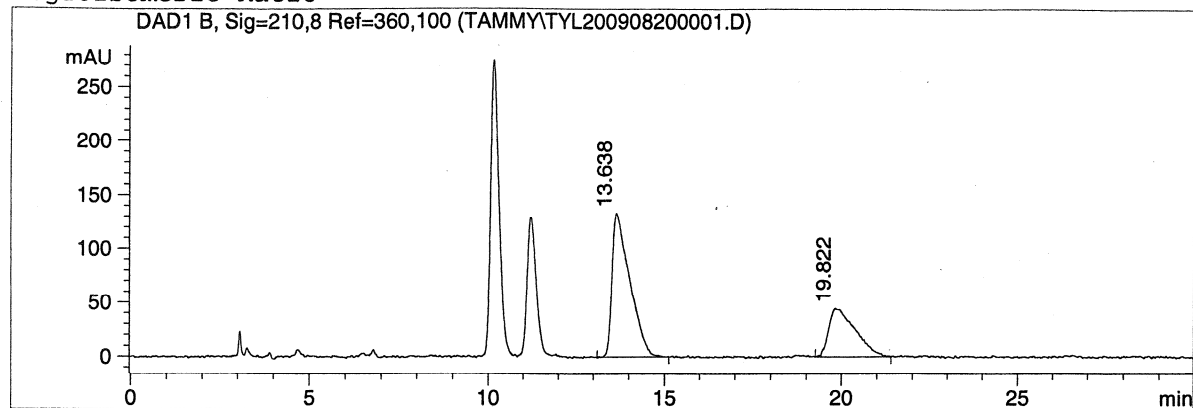

| # | RT (min) | Peak Area | Peak Area % |
|---|----------|-----------|-------------|
| 1 | 13.638   | 4598.940  | 66.375      |
| 2 | 19.822   | 2329.814  | 33.625      |

#### Regioisomeric Ratio

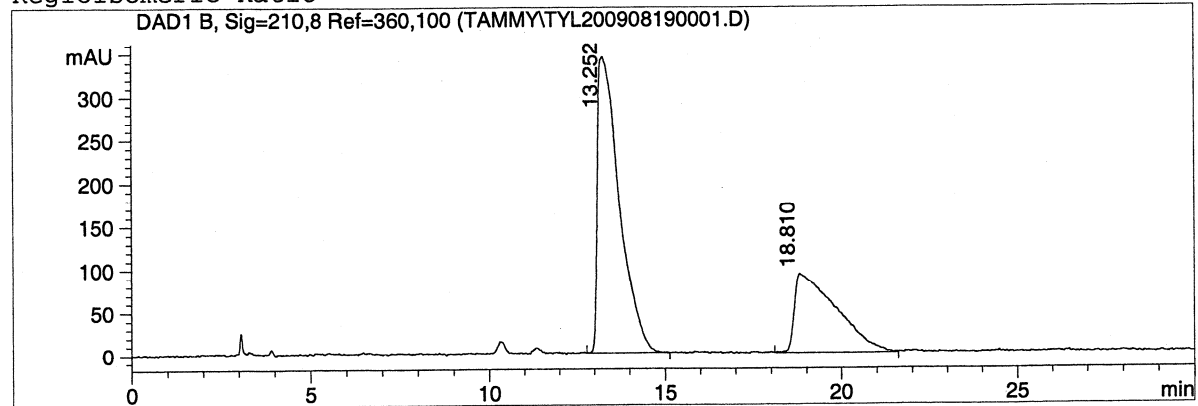

| # | RT (min) | Peak Area | Peak Area % |
|---|----------|-----------|-------------|
| 1 | 13.252   | 14881.391 | 66.199      |
| 2 | 18.810   | 7598.236  | 33.801      |



IA, hexanes/2-propanol = 90/10, flow rate 1.0 mL/min, 210 nm

Major Isomer

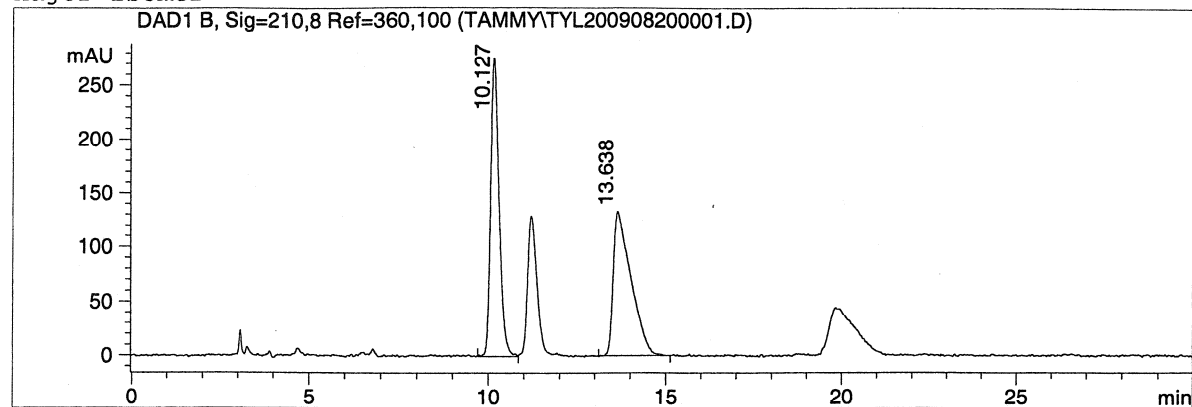

| # | RT (min) | Peak Area | Peak Area % |
|---|----------|-----------|-------------|
| 1 | 10.127   | 4595.646  | 49.982      |
| 2 | 13.638   | 4598.940  | 50.018      |

Major Isomer

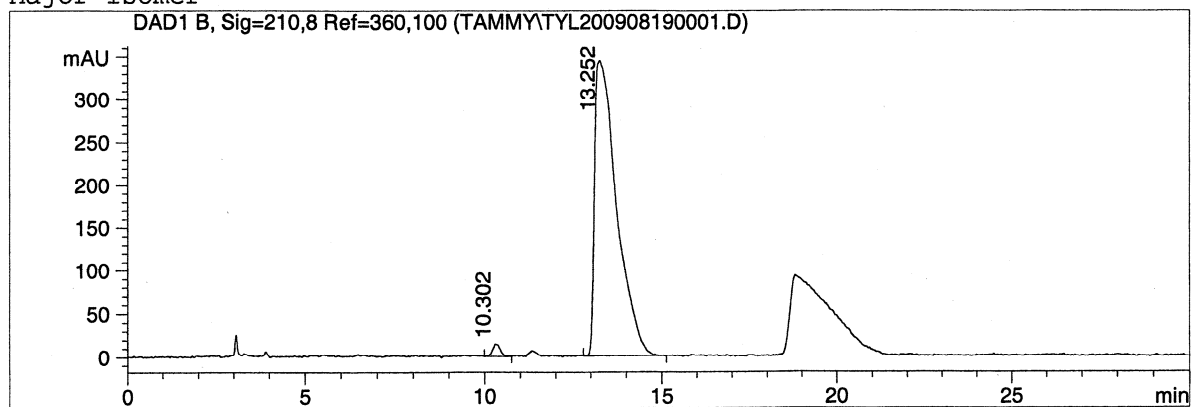

| # | RT (min) | Peak Area | Peak Area % |
|---|----------|-----------|-------------|
| 1 | 10.302   | 232.164   | 1.536       |
| 2 | 13.252   | 14881.391 | 98.464      |



IA, hexanes/2-propanol = 90/10, flow rate 1.0 mL/min, 210 nm

Minor Isomer

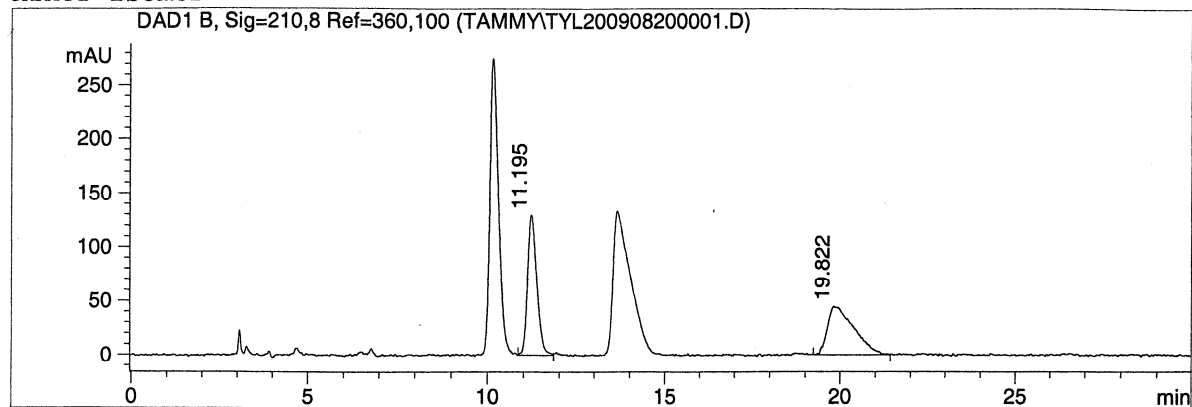

| # | RT (min) | Peak Area | Peak Area % |
|---|----------|-----------|-------------|
| 1 | 11.195   | 2356.082  | 50.271      |
| 2 | 19.822   | 2330.722  | 49.729      |

Minor Isomer

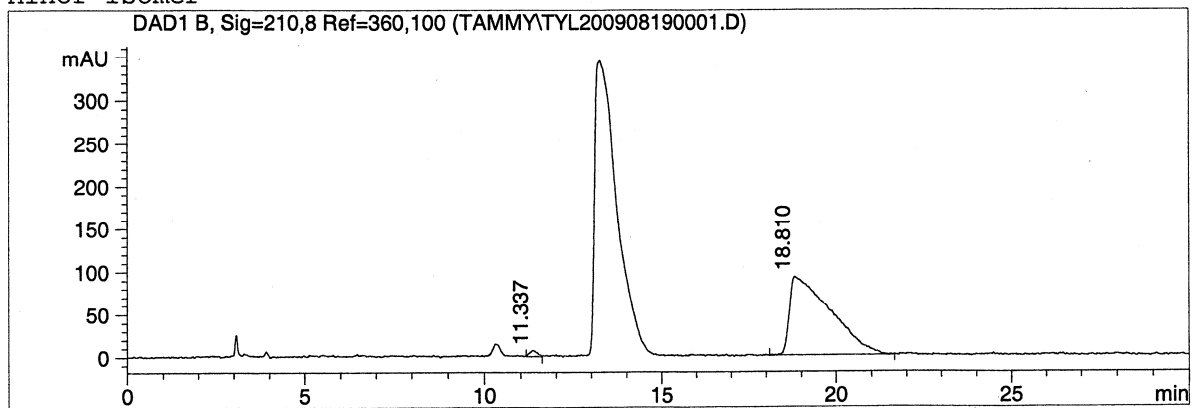

| # | RT (min) | Peak Area | Peak Area % |
|---|----------|-----------|-------------|
| 1 | 11.337   | 108.247   | 1.429       |
| 2 | 18.810   | 7464.358  | 98.571      |

Table 1. Crystal and structure refinement for **22**.

|                                          |                                                                                                               |                           |
|------------------------------------------|---------------------------------------------------------------------------------------------------------------|---------------------------|
| Identification Code                      | Lam02                                                                                                         |                           |
| Empirical formula                        | C <sub>18</sub> H <sub>24</sub> N <sub>2</sub> O <sub>7</sub>                                                 |                           |
| Formula weight                           | 380.39                                                                                                        |                           |
| Temperature                              | 100 K                                                                                                         |                           |
| Wavelength                               | 0.71073 Å                                                                                                     |                           |
| Crystal system                           | Monoclinic                                                                                                    |                           |
| Space Group                              | P2 <sub>1</sub>                                                                                               |                           |
| Unit cell dimensions                     | $a = 8.8090(16)$ Å                                                                                            | $\alpha = 90.0^\circ$     |
|                                          | $b = 9.2002(17)$ Å                                                                                            | $\beta = 92.499(3)^\circ$ |
|                                          | $c = 11.103(2)$ Å                                                                                             | $\gamma = 90.0^\circ$     |
| Volume                                   | 899.0(3) Å <sup>3</sup>                                                                                       |                           |
| Z                                        | 2                                                                                                             |                           |
| Density (calculated)                     | 1.405 Mg/m <sup>3</sup>                                                                                       |                           |
| Absorption coefficient                   | 0.109 mm <sup>-1</sup>                                                                                        |                           |
| F(000)                                   | 404                                                                                                           |                           |
| Crystal size, color, habit               | 0.40 x 0.40 x 0.40mm, clear, irregular                                                                        |                           |
| Theta range for data collection          | 1.84 – 28.29 °                                                                                                |                           |
| Index ranges                             | -11 ≤ h ≤ 11, -12 ≤ k ≤ 11, -14 ≤ l ≤ 14                                                                      |                           |
| Reflections collected                    | 10,783                                                                                                        |                           |
| Independent reflections                  | 3,966 (R <sub>int</sub> = 0.0238)                                                                             |                           |
| Reflections with I > 4σ(F <sub>o</sub> ) | 4,237                                                                                                         |                           |
| Flack parameter                          | indeterminate                                                                                                 |                           |
| Absorption correction                    | SADABS based on redundant diffractions                                                                        |                           |
| Max. and min. transmission               | 1.0, 0.749                                                                                                    |                           |
| Refinement method                        | Full-matrix least squares on F <sup>2</sup>                                                                   |                           |
| Weighting scheme                         | $w = q [\sigma^2 (F_o^2) + (aP)^2 + bP]^{-1}$ where:<br>$P = (F_o^2 + 2F_c^2)/3$ , a = 0.0655, b = 0.0, q = 1 |                           |
| Data / restraints / parameters           | 4237 / 0 / 248                                                                                                |                           |
| Goodness-of-fit on F <sup>2</sup>        | 0.925                                                                                                         |                           |
| Final R indices [I > 2 sigma(I)]         | R1 = 0.0389, wR2 = 0.0934                                                                                     |                           |
| R indices (all data)                     | R1 = 0.0411, wR2 = 0.0947                                                                                     |                           |
| Largest diff. peak and hole              | 0.308, -0.201 eÅ <sup>-3</sup>                                                                                |                           |

Table 2. Atomic coordinates [ $\times 10^4$ ] and equivalent isotropic displacement parameters [ $\text{\AA}^2 \times 10^3$ ] for **22**. U(eq) is defined as one third of the trace of the orthogonalized  $U_{ij}$  tensor.

|        | x        | y         | z         | U (eq) | SOF |
|--------|----------|-----------|-----------|--------|-----|
| C (1)  | 8008 (2) | 10379 (2) | 5910 (2)  | 23 (1) |     |
| C (2)  | 5374 (2) | 10663 (2) | 6263 (1)  | 15 (1) |     |
| C (3)  | 3753 (2) | 10185 (2) | 5874 (1)  | 15 (1) |     |
| C (4)  | 3600 (2) | 9080 (2)  | 4842 (2)  | 18 (1) |     |
| C (5)  | 2097 (2) | 9472 (2)  | 4164 (2)  | 21 (1) |     |
| C (6)  | 2140 (2) | 11138 (2) | 4185 (2)  | 22 (1) |     |
| C (7)  | 2731 (2) | 11511 (2) | 5459 (1)  | 17 (1) |     |
| C (8)  | 1660 (2) | 10483 (2) | 7132 (1)  | 17 (1) |     |
| C (9)  | 2476 (2) | 7309 (2)  | 7383 (1)  | 16 (1) |     |
| C (10) | 2839 (2) | 6015 (2)  | 8185 (1)  | 15 (1) |     |
| C (11) | 2762 (2) | 4531 (2)  | 7563 (2)  | 20 (1) |     |
| C (12) | 2798 (2) | 3472 (2)  | 8645 (2)  | 20 (1) |     |
| C (13) | 2860 (2) | 4511 (2)  | 9756 (1)  | 16 (1) |     |
| C (14) | 4416 (2) | 5198 (2)  | 9697 (1)  | 17 (1) |     |
| C (15) | 197 (2)  | 5455 (2)  | 8991 (2)  | 20 (1) |     |
| C (16) | 1862 (2) | 5821 (2)  | 9309 (1)  | 16 (1) |     |
| C (17) | 1929 (2) | 7120 (2)  | 10170 (2) | 19 (1) |     |
| C (18) | 2553 (2) | 3813 (2)  | 10956 (2) | 20 (1) |     |
| N (1)  | 2982 (2) | 9764 (2)  | 6948 (1)  | 16 (1) |     |
| N (2)  | 3363 (2) | 8513 (1)  | 7576 (1)  | 15 (1) |     |
| O (1)  | 6423 (1) | 10014 (1) | 5616 (1)  | 21 (1) |     |
| O (2)  | 5636 (1) | 11525 (1) | 7056 (1)  | 24 (1) |     |
| O (3)  | 1486 (1) | 11534 (1) | 6278 (1)  | 19 (1) |     |
| O (4)  | 778 (1)  | 10277 (1) | 7907 (1)  | 22 (1) |     |
| O (5)  | 1446 (1) | 7254 (1)  | 6618 (1)  | 20 (1) |     |
| O (6)  | 4377 (1) | 6137 (1)  | 8735 (1)  | 17 (1) |     |
| O (7)  | 5561 (1) | 5011 (1)  | 10303 (1) | 22 (1) |     |

Table 3. Bond lengths [Å] and angles [°] for **22**.

|                  |            |                   |            |
|------------------|------------|-------------------|------------|
| C(1)–O(1)        | 1.4595(19) | C(9)–N(2)         | 1.367(2)   |
| C(2)–O(2)        | 1.200(2)   | C(9)–C(10)        | 1.512(2)   |
| C(2)–O(1)        | 1.335(2)   | C(10)–O(6)        | 1.4658(18) |
| C(2)–C(3)        | 1.538(2)   | C(10)–C(11)       | 1.531(2)   |
| C(3)–N(1)        | 1.451(2)   | C(10)–C(16)       | 1.556(2)   |
| C(3)–C(4)        | 1.533(2)   | C(11)–C(12)       | 1.546(2)   |
| C(3)–C(7)        | 1.573(2)   | C(12)–C(13)       | 1.559(2)   |
| C(4)–C(5)        | 1.537(2)   | C(13)–C(14)       | 1.513(2)   |
| C(5)–C(6)        | 1.534(3)   | C(13)–C(18)       | 1.514(2)   |
| C(6)–C(7)        | 1.525(2)   | C(13)–C(16)       | 1.560(2)   |
| C(7)–O(3)        | 1.454(2)   | C(14)–O(7)        | 1.2003(18) |
| C(8)–O(4)        | 1.199(2)   | C(14)–O(6)        | 1.373(2)   |
| C(8)–O(3)        | 1.358(2)   | C(15)–C(16)       | 1.532(2)   |
| C(8)–N(1)        | 1.363(2)   | C(16)–C(17)       | 1.530(2)   |
| C(9)–O(5)        | 1.2172(19) | N(1)–N(2)         | 1.3789(19) |
| O(2)–C(2)–O(1)   | 125.09(14) | C(11)–C(10)–C(16) | 104.12(13) |
| O(2)–C(2)–C(3)   | 122.76(15) | C(10)–C(11)–C(12) | 102.28(13) |
| O(1)–C(2)–C(3)   | 112.15(13) | C(11)–C(12)–C(13) | 103.11(13) |
| N(1)–C(3)–C(4)   | 114.10(13) | C(14)–C(13)–C(18) | 114.37(14) |
| N(1)–C(3)–C(2)   | 107.90(12) | C(14)–C(13)–C(12) | 102.86(13) |
| C(4)–C(3)–C(2)   | 116.71(13) | C(18)–C(13)–C(12) | 115.74(14) |
| N(1)–C(3)–C(7)   | 99.52(12)  | C(14)–C(13)–C(16) | 99.35(13)  |
| C(4)–C(3)–C(7)   | 105.38(12) | C(18)–C(13)–C(16) | 119.17(14) |
| C(2)–C(3)–C(7)   | 111.92(13) | C(12)–C(13)–C(16) | 102.84(12) |
| C(3)–C(4)–C(5)   | 104.84(13) | O(7)–C(14)–O(6)   | 121.24(14) |
| C(6)–C(5)–C(4)   | 101.94(14) | O(7)–C(14)–C(13)  | 131.01(15) |
| C(7)–C(6)–C(5)   | 104.24(14) | O(6)–C(14)–C(13)  | 107.72(13) |
| O(3)–C(7)–C(6)   | 110.33(13) | C(17)–C(16)–C(15) | 109.04(13) |
| O(3)–C(7)–C(3)   | 105.42(12) | C(17)–C(16)–C(10) | 113.78(13) |
| C(6)–C(7)–C(3)   | 105.34(13) | C(15)–C(16)–C(10) | 113.43(13) |
| O(4)–C(8)–O(3)   | 123.81(15) | C(17)–C(16)–C(13) | 113.54(13) |
| O(4)–C(8)–N(1)   | 127.96(16) | C(15)–C(16)–C(13) | 115.12(13) |
| O(3)–C(8)–N(1)   | 108.22(14) | C(10)–C(16)–C(13) | 91.17(12)  |
| O(5)–C(9)–N(2)   | 123.18(15) | C(8)–N(1)–N(2)    | 121.38(14) |
| O(5)–C(9)–C(10)  | 120.65(14) | C(8)–N(1)–C(3)    | 115.25(13) |
| N(2)–C(9)–C(10)  | 116.17(13) | N(2)–N(1)–C(3)    | 121.74(13) |
| O(6)–C(10)–C(9)  | 110.65(12) | C(9)–N(2)–N(1)    | 118.18(13) |
| O(6)–C(10)–C(11) | 106.13(13) | C(2)–O(1)–C(1)    | 117.03(13) |
| C(9)–C(10)–C(11) | 115.62(12) | C(8)–O(3)–C(7)    | 111.15(12) |
| O(6)–C(10)–C(16) | 102.01(11) | C(14)–O(6)–C(10)  | 105.52(12) |
| C(9)–C(10)–C(16) | 116.93(13) |                   |            |

Table 4. Anisotropic displacement parameters [ $\text{\AA}^2 \times 10^3$ ] for **22**. The anisotropic displacement factor exponent takes the form:  
 $-2\pi^2[h^2a^{*2}U_{11}+ \dots + 2hka^*b^*U_{12}]$

|        | $U_{11}$ | $U_{22}$ | $U_{33}$ | $U_{23}$ | $U_{13}$ | $U_{12}$ |
|--------|----------|----------|----------|----------|----------|----------|
| C (1)  | 11 (1)   | 30 (1)   | 26 (1)   | 3 (1)    | 0 (1)    | -1 (1)   |
| C (2)  | 15 (1)   | 15 (1)   | 14 (1)   | 4 (1)    | 0 (1)    | 0 (1)    |
| C (3)  | 14 (1)   | 15 (1)   | 15 (1)   | 1 (1)    | 1 (1)    | 0 (1)    |
| C (4)  | 18 (1)   | 19 (1)   | 16 (1)   | -2 (1)   | 1 (1)    | 0 (1)    |
| C (5)  | 18 (1)   | 26 (1)   | 18 (1)   | -3 (1)   | -2 (1)   | 0 (1)    |
| C (6)  | 21 (1)   | 26 (1)   | 18 (1)   | 3 (1)    | -3 (1)   | 2 (1)    |
| C (7)  | 17 (1)   | 16 (1)   | 18 (1)   | 3 (1)    | 0 (1)    | 1 (1)    |
| C (8)  | 16 (1)   | 17 (1)   | 17 (1)   | -4 (1)   | -3 (1)   | -1 (1)   |
| C (9)  | 15 (1)   | 19 (1)   | 14 (1)   | 0 (1)    | 4 (1)    | -2 (1)   |
| C (10) | 15 (1)   | 16 (1)   | 15 (1)   | -1 (1)   | -1 (1)   | -1 (1)   |
| C (11) | 24 (1)   | 18 (1)   | 18 (1)   | -3 (1)   | 2 (1)    | 0 (1)    |
| C (12) | 24 (1)   | 15 (1)   | 20 (1)   | -1 (1)   | 2 (1)    | 0 (1)    |
| C (13) | 17 (1)   | 14 (1)   | 17 (1)   | -2 (1)   | 1 (1)    | 0 (1)    |
| C (14) | 19 (1)   | 15 (1)   | 16 (1)   | 0 (1)    | 2 (1)    | 2 (1)    |
| C (15) | 18 (1)   | 21 (1)   | 21 (1)   | 2 (1)    | 1 (1)    | -1 (1)   |
| C (16) | 18 (1)   | 14 (1)   | 15 (1)   | 1 (1)    | 1 (1)    | 0 (1)    |
| C (17) | 24 (1)   | 17 (1)   | 18 (1)   | -2 (1)   | 3 (1)    | 2 (1)    |
| C (18) | 23 (1)   | 18 (1)   | 18 (1)   | 3 (1)    | 1 (1)    | 0 (1)    |
| N (1)  | 16 (1)   | 15 (1)   | 16 (1)   | 2 (1)    | 2 (1)    | 0 (1)    |
| N (2)  | 16 (1)   | 15 (1)   | 15 (1)   | 4 (1)    | -3 (1)   | -1 (1)   |
| O (1)  | 13 (1)   | 26 (1)   | 24 (1)   | -3 (1)   | 0 (1)    | 1 (1)    |
| O (2)  | 21 (1)   | 26 (1)   | 23 (1)   | -5 (1)   | 0 (1)    | -4 (1)   |
| O (3)  | 16 (1)   | 20 (1)   | 22 (1)   | 0 (1)    | 1 (1)    | 4 (1)    |
| O (4)  | 18 (1)   | 28 (1)   | 21 (1)   | -3 (1)   | 5 (1)    | -2 (1)   |
| O (5)  | 20 (1)   | 22 (1)   | 17 (1)   | 2 (1)    | -3 (1)   | -5 (1)   |
| O (6)  | 15 (1)   | 20 (1)   | 17 (1)   | 3 (1)    | 0 (1)    | -2 (1)   |
| O (7)  | 20 (1)   | 24 (1)   | 23 (1)   | 4 (1)    | -3 (1)   | 1 (1)    |

Table 5. Hydrogen coordinates [ $\times 10^4$ ] and isotropic displacement parameters [ $\text{\AA}^2 \times 10^3$ ] for **22**.

|         | x    | y     | z     | U (eq) |
|---------|------|-------|-------|--------|
| H (1A)  | 8423 | 10926 | 5242  | 34     |
| H (1B)  | 8595 | 9484  | 6043  | 34     |
| H (1C)  | 8071 | 10973 | 6643  | 34     |
| H (4A)  | 3566 | 8076  | 5160  | 21     |
| H (4B)  | 4463 | 9163  | 4304  | 21     |
| H (5A)  | 2066 | 9094  | 3328  | 25     |
| H (5B)  | 1213 | 9093  | 4586  | 25     |
| H (6A)  | 2831 | 11517 | 3579  | 26     |
| H (6B)  | 1113 | 11549 | 4021  | 26     |
| H (7)   | 3314 | 12444 | 5483  | 21     |
| H (11A) | 3644 | 4378  | 7055  | 24     |
| H (11B) | 1812 | 4423  | 7060  | 24     |
| H (12A) | 3706 | 2838  | 8645  | 23     |
| H (12B) | 1874 | 2858  | 8634  | 23     |
| H (15A) | -344 | 5301  | 9733  | 30     |
| H (15B) | 143  | 4568  | 8501  | 30     |
| H (15C) | -275 | 6260  | 8535  | 30     |
| H (17A) | 1471 | 7970  | 9765  | 29     |
| H (17B) | 2991 | 7332  | 10406 | 29     |
| H (17C) | 1369 | 6890  | 10889 | 29     |
| H (18A) | 3181 | 2940  | 11064 | 30     |
| H (18B) | 1477 | 3546  | 10972 | 30     |
| H (18C) | 2801 | 4502  | 11608 | 30     |
| H (2)   | 4156 | 8490  | 8086  | 18     |

Table 6. Torsion angles [ $^{\circ}$ ] for **22**.

|                         |             |                         |             |
|-------------------------|-------------|-------------------------|-------------|
| O(2)-C(2)-C(3)-N(1)     | -50.3(2)    | O(6)-C(10)-C(16)-C(15)  | -172.07(13) |
| O(1)-C(2)-C(3)-N(1)     | 129.97(14)  | C(9)-C(10)-C(16)-C(15)  | 67.09(18)   |
| O(2)-C(2)-C(3)-C(4)     | 179.71(14)  | C(11)-C(10)-C(16)-C(15) | -61.81(16)  |
| O(1)-C(2)-C(3)-C(4)     | -0.03(19)   | O(6)-C(10)-C(16)-C(13)  | -53.93(13)  |
| O(2)-C(2)-C(3)-C(7)     | 58.2(2)     | C(9)-C(10)-C(16)-C(13)  | -174.77(13) |
| O(1)-C(2)-C(3)-C(7)     | -121.53(14) | C(11)-C(10)-C(16)-C(13) | 56.33(13)   |
| N(1)-C(3)-C(4)-C(5)     | 85.92(15)   | C(14)-C(13)-C(16)-C(17) | -65.56(16)  |
| C(2)-C(3)-C(4)-C(5)     | -147.08(14) | C(18)-C(13)-C(16)-C(17) | 59.25(19)   |
| C(7)-C(3)-C(4)-C(5)     | -22.20(16)  | C(12)-C(13)-C(16)-C(17) | -171.15(13) |
| C(3)-C(4)-C(5)-C(6)     | 39.63(16)   | C(14)-C(13)-C(16)-C(15) | 167.77(13)  |
| C(4)-C(5)-C(6)-C(7)     | -42.06(17)  | C(18)-C(13)-C(16)-C(15) | -67.42(19)  |
| C(5)-C(6)-C(7)-O(3)     | -84.93(16)  | C(12)-C(13)-C(16)-C(15) | 62.18(17)   |
| C(5)-C(6)-C(7)-C(3)     | 28.38(17)   | C(14)-C(13)-C(16)-C(10) | 51.11(13)   |
| N(1)-C(3)-C(7)-O(3)     | -5.47(15)   | C(18)-C(13)-C(16)-C(10) | 175.92(14)  |
| C(4)-C(3)-C(7)-O(3)     | 112.93(13)  | C(12)-C(13)-C(16)-C(10) | -54.49(13)  |
| C(2)-C(3)-C(7)-O(3)     | -119.25(13) | O(4)-C(8)-N(1)-N(2)     | 9.7(3)      |
| N(1)-C(3)-C(7)-C(6)     | -122.18(14) | O(3)-C(8)-N(1)-N(2)     | -171.22(13) |
| C(4)-C(3)-C(7)-C(6)     | -3.78(17)   | O(4)-C(8)-N(1)-C(3)     | 175.36(16)  |
| C(2)-C(3)-C(7)-C(6)     | 124.04(14)  | O(3)-C(8)-N(1)-C(3)     | -5.56(18)   |
| O(5)-C(9)-C(10)-O(6)    | 161.13(14)  | C(4)-C(3)-N(1)-C(8)     | -104.85(16) |
| N(2)-C(9)-C(10)-O(6)    | -18.97(19)  | C(2)-C(3)-N(1)-C(8)     | 123.70(15)  |
| O(5)-C(9)-C(10)-C(11)   | 40.5(2)     | C(7)-C(3)-N(1)-C(8)     | 6.84(17)    |
| N(2)-C(9)-C(10)-C(11)   | -139.64(15) | C(4)-C(3)-N(1)-N(2)     | 60.75(18)   |
| O(5)-C(9)-C(10)-C(16)   | -82.71(19)  | C(2)-C(3)-N(1)-N(2)     | -70.69(18)  |
| N(2)-C(9)-C(10)-C(16)   | 97.19(17)   | C(7)-C(3)-N(1)-N(2)     | 172.44(13)  |
| O(6)-C(10)-C(11)-C(12)  | 69.95(15)   | O(5)-C(9)-N(2)-N(1)     | 6.1(2)      |
| C(9)-C(10)-C(11)-C(12)  | -166.97(13) | C(10)-C(9)-N(2)-N(1)    | -173.78(13) |
| C(16)-C(10)-C(11)-C(12) | -37.27(15)  | C(8)-N(1)-N(2)-C(9)     | 65.20(19)   |
| C(10)-C(11)-C(12)-C(13) | 1.05(16)    | C(3)-N(1)-N(2)-C(9)     | -99.52(17)  |
| C(11)-C(12)-C(13)-C(14) | -67.75(15)  | O(2)-C(2)-O(1)-C(1)     | 0.6(2)      |
| C(11)-C(12)-C(13)-C(18) | 166.80(14)  | C(3)-C(2)-O(1)-C(1)     | -179.70(13) |
| C(11)-C(12)-C(13)-C(16) | 35.13(16)   | O(4)-C(8)-O(3)-C(7)     | -179.62(15) |
| C(18)-C(13)-C(14)-O(7)  | 19.8(3)     | N(1)-C(8)-O(3)-C(7)     | 1.26(17)    |
| C(12)-C(13)-C(14)-O(7)  | -106.6(2)   | C(6)-C(7)-O(3)-C(8)     | 116.16(15)  |
| C(16)-C(13)-C(14)-O(7)  | 147.85(18)  | C(3)-C(7)-O(3)-C(8)     | 2.91(16)    |
| C(18)-C(13)-C(14)-O(6)  | -162.25(13) | O(7)-C(14)-O(6)-C(10)   | 176.96(15)  |
| C(12)-C(13)-C(14)-O(6)  | 71.42(15)   | C(13)-C(14)-O(6)-C(10)  | -1.26(16)   |
| C(16)-C(13)-C(14)-O(6)  | -34.16(15)  | C(9)-C(10)-O(6)-C(14)   | 161.80(12)  |
| O(6)-C(10)-C(16)-C(17)  | 62.52(16)   | C(11)-C(10)-O(6)-C(14)  | -72.04(15)  |
| C(9)-C(10)-C(16)-C(17)  | -58.31(17)  | C(16)-C(10)-O(6)-C(14)  | 36.70(15)   |
| C(11)-C(10)-C(16)-C(17) | 172.78(13)  |                         |             |
